# Supplementary material
Source: publisher figshare collection journal article supplement (https://gsajournals.figshare.com/ndownloader/files/13173416)
Supplement: Supplementary file 1 [file 13173416]

	date	experiment	round	assay	condition	control	plate	row	col	strain	trait	phenotype
1	20140429	RIAILs	1	b	carmustine	halfpercDMSO	2	A	1	QX318	cv.EXT	-0.0359215829267604
2	20140512	RIAILs	1	e	carmustine	halfpercDMSO	2	A	1	QX89	cv.EXT	-0.0793873881685896
3	20140513	RIAILs	1	f	carmustine	halfpercDMSO	2	A	1	QX184	cv.EXT	0.0991126898212403
4	20140520	RIAILs	1	h	carmustine	halfpercDMSO	2	A	1	QX297	cv.EXT	-0.118917691916017
5	20140527	RIAILs	1	j	carmustine	halfpercDMSO	2	A	1	QX218	cv.EXT	-0.00363820860834462
6	20140603	RIAILs	1	k	carmustine	halfpercDMSO	2	A	1	QX137	cv.EXT	-0.108175462513494
7	20140623	RIAILs	1	l	carmustine	halfpercDMSO	2	A	1	QX364	cv.EXT	-0.0489861284198959
8	20140429	RIAILs	1	b	carmustine	halfpercDMSO	2	A	1	QX318	cv.TOF	-0.0229183043187187
9	20140512	RIAILs	1	e	carmustine	halfpercDMSO	2	A	1	QX89	cv.TOF	-0.0269840739440342
10	20140513	RIAILs	1	f	carmustine	halfpercDMSO	2	A	1	QX184	cv.TOF	0.0609082209487272
11	20140520	RIAILs	1	h	carmustine	halfpercDMSO	2	A	1	QX297	cv.TOF	-0.0763507129689204
12	20140527	RIAILs	1	j	carmustine	halfpercDMSO	2	A	1	QX218	cv.TOF	-0.0474067787811021
13	20140603	RIAILs	1	k	carmustine	halfpercDMSO	2	A	1	QX137	cv.TOF	-0.0464519948088114
14	20140623	RIAILs	1	l	carmustine	halfpercDMSO	2	A	1	QX364	cv.TOF	-0.048598140104895
15	20140429	RIAILs	1	b	carmustine	halfpercDMSO	2	A	1	QX318	mean.EXT	-127.476809027148
16	20140512	RIAILs	1	e	carmustine	halfpercDMSO	2	A	1	QX89	mean.EXT	95.3406049901606
17	20140513	RIAILs	1	f	carmustine	halfpercDMSO	2	A	1	QX184	mean.EXT	-134.484060378849
18	20140520	RIAILs	1	h	carmustine	halfpercDMSO	2	A	1	QX297	mean.EXT	29.7073389503966
19	20140527	RIAILs	1	j	carmustine	halfpercDMSO	2	A	1	QX218	mean.EXT	-25.0383459100353
20	20140603	RIAILs	1	k	carmustine	halfpercDMSO	2	A	1	QX137	mean.EXT	130.459737571694
21	20140623	RIAILs	1	l	carmustine	halfpercDMSO	2	A	1	QX364	mean.EXT	30.8297758787344
22	20140429	RIAILs	1	b	carmustine	halfpercDMSO	2	A	1	QX318	mean.norm.EXT	-0.0293165506718484
23	20140512	RIAILs	1	e	carmustine	halfpercDMSO	2	A	1	QX89	mean.norm.EXT	0.11935089083484
24	20140513	RIAILs	1	f	carmustine	halfpercDMSO	2	A	1	QX184	mean.norm.EXT	0.0523355856063878
25	20140520	RIAILs	1	h	carmustine	halfpercDMSO	2	A	1	QX297	mean.norm.EXT	0.151218980883191
26	20140527	RIAILs	1	j	carmustine	halfpercDMSO	2	A	1	QX218	mean.norm.EXT	0.0201795599975187
27	20140603	RIAILs	1	k	carmustine	halfpercDMSO	2	A	1	QX137	mean.norm.EXT	0.265843053540411
28	20140623	RIAILs	1	l	carmustine	halfpercDMSO	2	A	1	QX364	mean.norm.EXT	0.179921898776347
29	20140429	RIAILs	1	b	carmustine	halfpercDMSO	2	A	1	QX318	mean.TOF	-35.755665283938
30	20140512	RIAILs	1	e	carmustine	halfpercDMSO	2	A	1	QX89	mean.TOF	21.8087731595958
31	20140513	RIAILs	1	f	carmustine	halfpercDMSO	2	A	1	QX184	mean.TOF	-53.299329455128
32	20140520	RIAILs	1	h	carmustine	halfpercDMSO	2	A	1	QX297	mean.TOF	-1.07925006846034
33	20140527	RIAILs	1	j	carmustine	halfpercDMSO	2	A	1	QX218	mean.TOF	-11.6321718046823
34	20140603	RIAILs	1	k	carmustine	halfpercDMSO	2	A	1	QX137	mean.TOF	0.0379376314756676
35	20140623	RIAILs	1	l	carmustine	halfpercDMSO	2	A	1	QX364	mean.TOF	-13.9577394037565
36	20140429	RIAILs	1	b	carmustine	halfpercDMSO	2	A	1	QX318	median.EXT	-101.662719807091
37	20140512	RIAILs	1	e	carmustine	halfpercDMSO	2	A	1	QX89	median.EXT	66.7938654710196
38	20140513	RIAILs	1	f	carmustine	halfpercDMSO	2	A	1	QX184	median.EXT	-127.453477545285
39	20140520	RIAILs	1	h	carmustine	halfpercDMSO	2	A	1	QX297	median.EXT	37.4626340293472
40	20140527	RIAILs	1	j	carmustine	halfpercDMSO	2	A	1	QX218	median.EXT	5.74666197243734
41	20140603	RIAILs	1	k	carmustine	halfpercDMSO	2	A	1	QX137	median.EXT	-6.77244548656485
42	20140623	RIAILs	1	l	carmustine	halfpercDMSO	2	A	1	QX364	median.EXT	41.207350030869
43	20140429	RIAILs	1	b	carmustine	halfpercDMSO	2	A	1	QX318	median.norm.EXT	-0.0119312494762747
44	20140512	RIAILs	1	e	carmustine	halfpercDMSO	2	A	1	QX89	median.norm.EXT	0.25509622194352
45	20140513	RIAILs	1	f	carmustine	halfpercDMSO	2	A	1	QX184	median.norm.EXT	-0.0156358028117481
46	20140520	RIAILs	1	h	carmustine	halfpercDMSO	2	A	1	QX297	median.norm.EXT	0.292873330725451
47	20140527	RIAILs	1	j	carmustine	halfpercDMSO	2	A	1	QX218	median.norm.EXT	-0.0470622181082345
48	20140603	RIAILs	1	k	carmustine	halfpercDMSO	2	A	1	QX137	median.norm.EXT	0.339152380447836
49	20140623	RIAILs	1	l	carmustine	halfpercDMSO	2	A	1	QX364	median.norm.EXT	0.183395445651575
50	20140429	RIAILs	1	b	carmustine	halfpercDMSO	2	A	1	QX318	median.TOF	-44.7878125782338
51	20140512	RIAILs	1	e	carmustine	halfpercDMSO	2	A	1	QX89	median.TOF	23.9461218627211
52	20140513	RIAILs	1	f	carmustine	halfpercDMSO	2	A	1	QX184	median.TOF	-63.7755651965696
53	20140520	RIAILs	1	h	carmustine	halfpercDMSO	2	A	1	QX297	median.TOF	18.558571692359
54	20140527	RIAILs	1	j	carmustine	halfpercDMSO	2	A	1	QX218	median.TOF	-4.20466044668724
55	20140603	RIAILs	1	k	carmustine	halfpercDMSO	2	A	1	QX137	median.TOF	20.5904447818936
56	20140623	RIAILs	1	l	carmustine	halfpercDMSO	2	A	1	QX364	median.TOF	-3.16323315905223
57	20140429	RIAILs	1	b	carmustine	halfpercDMSO	2	A	1	QX318	n	74.6721597024271
58	20140512	RIAILs	1	e	carmustine	halfpercDMSO	2	A	1	QX89	n	2.00121169655612
59	20140513	RIAILs	1	f	carmustine	halfpercDMSO	2	A	1	QX184	n	-5.45905497802394
60	20140520	RIAILs	1	h	carmustine	halfpercDMSO	2	A	1	QX297	n	54.4874002973332
61	20140527	RIAILs	1	j	carmustine	halfpercDMSO	2	A	1	QX218	n	-92.7052846097307
62	20140603	RIAILs	1	k	carmustine	halfpercDMSO	2	A	1	QX137	n	-6.20658672730253
63	20140623	RIAILs	1	l	carmustine	halfpercDMSO	2	A	1	QX364	n	-15.126689335238
64	20140429	RIAILs	1	b	carmustine	halfpercDMSO	2	A	1	QX318	norm.n	25.5411006310812
65	20140512	RIAILs	1	e	carmustine	halfpercDMSO	2	A	1	QX89	norm.n	0.730505203216983
66	20140513	RIAILs	1	f	carmustine	halfpercDMSO	2	A	1	QX184	norm.n	-1.10660044638849
67	20140520	RIAILs	1	h	carmustine	halfpercDMSO	2	A	1	QX297	norm.n	18.4924927771859
68	20140527	RIAILs	1	j	carmustine	halfpercDMSO	2	A	1	QX218	norm.n	-31.1105507245875
69	20140603	RIAILs	1	k	carmustine	halfpercDMSO	2	A	1	QX137	norm.n	-2.05802266194526
70	20140623	RIAILs	1	l	carmustine	halfpercDMSO	2	A	1	QX364	norm.n	-4.99802101535949
71	20140429	RIAILs	1	b	carmustine	halfpercDMSO	2	A	1	QX318	q10.EXT	-6.28898831520696
72	20140512	RIAILs	1	e	carmustine	halfpercDMSO	2	A	1	QX89	q10.EXT	16.6953512131686
73	20140513	RIAILs	1	f	carmustine	halfpercDMSO	2	A	1	QX184	q10.EXT	-2.46806049186597
74	20140520	RIAILs	1	h	carmustine	halfpercDMSO	2	A	1	QX297	q10.EXT	6.78224725157408
75	20140527	RIAILs	1	j	carmustine	halfpercDMSO	2	A	1	QX218	q10.EXT	-4.97678302380649
76	20140603	RIAILs	1	k	carmustine	halfpercDMSO	2	A	1	QX137	q10.EXT	-5.81078543479004
77	20140623	RIAILs	1	l	carmustine	halfpercDMSO	2	A	1	QX364	q10.EXT	-6.47819171105979
78	20140429	RIAILs	1	b	carmustine	halfpercDMSO	2	A	1	QX318	q10.norm.EXT	-0.0115329273157024
79	20140512	RIAILs	1	e	carmustine	halfpercDMSO	2	A	1	QX89	q10.norm.EXT	-0.062223738678142
80	20140513	RIAILs	1	f	carmustine	halfpercDMSO	2	A	1	QX184	q10.norm.EXT	-0.00574673780795483
81	20140520	RIAILs	1	h	carmustine	halfpercDMSO	2	A	1	QX297	q10.norm.EXT	0.0649954598402297
82	20140527	RIAILs	1	j	carmustine	halfpercDMSO	2	A	1	QX218	q10.norm.EXT	0.0117912351256983
83	20140603	RIAILs	1	k	carmustine	halfpercDMSO	2	A	1	QX137	q10.norm.EXT	0.00812627671422237
84	20140623	RIAILs	1	l	carmustine	halfpercDMSO	2	A	1	QX364	q10.norm.EXT	0.0380461794380293
85	20140429	RIAILs	1	b	carmustine	halfpercDMSO	2	A	1	QX318	q10.TOF	-4.36780108481021
86	20140512	RIAILs	1	e	carmustine	halfpercDMSO	2	A	1	QX89	q10.TOF	7.54743786820272
87	20140513	RIAILs	1	f	carmustine	halfpercDMSO	2	A	1	QX184	q10.TOF	-7.6807541952201
88	20140520	RIAILs	1	h	carmustine	halfpercDMSO	2	A	1	QX297	q10.TOF	1.36920018193885
89	20140527	RIAILs	1	j	carmustine	halfpercDMSO	2	A	1	QX218	q10.TOF	-6.28425356102771
90	20140603	RIAILs	1	k	carmustine	halfpercDMSO	2	A	1	QX137	q10.TOF	-3.14031755849821
91	20140623	RIAILs	1	l	carmustine	halfpercDMSO	2	A	1	QX364	q10.TOF	-7.46509206351502
92	20140429	RIAILs	1	b	carmustine	halfpercDMSO	2	A	1	QX318	q25.EXT	-23.9281754147092
93	20140512	RIAILs	1	e	carmustine	halfpercDMSO	2	A	1	QX89	q25.EXT	29.987876081704
94	20140513	RIAILs	1	f	carmustine	halfpercDMSO	2	A	1	QX184	q25.EXT	-65.1182176987641
95	20140520	RIAILs	1	h	carmustine	halfpercDMSO	2	A	1	QX297	q25.EXT	95.0290843194249
96	20140527	RIAILs	1	j	carmustine	halfpercDMSO	2	A	1	QX218	q25.EXT	-12.8932985300979
97	20140603	RIAILs	1	k	carmustine	halfpercDMSO	2	A	1	QX137	q25.EXT	-22.6463850501517
98	20140623	RIAILs	1	l	carmustine	halfpercDMSO	2	A	1	QX364	q25.EXT	6.16860616955467
99	20140429	RIAILs	1	b	carmustine	halfpercDMSO	2	A	1	QX318	q25.norm.EXT	0.0037873022314394
100	20140512	RIAILs	1	e	carmustine	halfpercDMSO	2	A	1	QX89	q25.norm.EXT	0.089550537538536
101	20140513	RIAILs	1	f	carmustine	halfpercDMSO	2	A	1	QX184	q25.norm.EXT	-0.0753822261058138
102	20140520	RIAILs	1	h	carmustine	halfpercDMSO	2	A	1	QX297	q25.norm.EXT	0.0931874442547188
103	20140527	RIAILs	1	j	carmustine	halfpercDMSO	2	A	1	QX218	q25.norm.EXT	0.0292964640434874
104	20140603	RIAILs	1	k	carmustine	halfpercDMSO	2	A	1	QX137	q25.norm.EXT	0.158255521992126
105	20140623	RIAILs	1	l	carmustine	halfpercDMSO	2	A	1	QX364	q25.norm.EXT	0.0370233134708179
106	20140429	RIAILs	1	b	carmustine	halfpercDMSO	2	A	1	QX318	q25.TOF	-8.93745758848664
107	20140512	RIAILs	1	e	carmustine	halfpercDMSO	2	A	1	QX89	q25.TOF	11.2059278377404
108	20140513	RIAILs	1	f	carmustine	halfpercDMSO	2	A	1	QX184	q25.TOF	-26.7634747366729
109	20140520	RIAILs	1	h	carmustine	halfpercDMSO	2	A	1	QX297	q25.TOF	7.3735386560669
110	20140527	RIAILs	1	j	carmustine	halfpercDMSO	2	A	1	QX218	q25.TOF	-6.07604518402056
111	20140603	RIAILs	1	k	carmustine	halfpercDMSO	2	A	1	QX137	q25.TOF	-8.54661619724348
112	20140623	RIAILs	1	l	carmustine	halfpercDMSO	2	A	1	QX364	q25.TOF	2.66449506216572
113	20140429	RIAILs	1	b	carmustine	halfpercDMSO	2	A	1	QX318	q75.EXT	-143.227094361723
114	20140512	RIAILs	1	e	carmustine	halfpercDMSO	2	A	1	QX89	q75.EXT	187.793845482156
115	20140513	RIAILs	1	f	carmustine	halfpercDMSO	2	A	1	QX184	q75.EXT	-212.605981172558
116	20140520	RIAILs	1	h	carmustine	halfpercDMSO	2	A	1	QX297	q75.EXT	67.9696857042274
117	20140527	RIAILs	1	j	carmustine	halfpercDMSO	2	A	1	QX218	q75.EXT	88.1700709799733
118	20140603	RIAILs	1	k	carmustine	halfpercDMSO	2	A	1	QX137	q75.EXT	489.348494082104
119	20140623	RIAILs	1	l	carmustine	halfpercDMSO	2	A	1	QX364	q75.EXT	151.741544466141
120	20140429	RIAILs	1	b	carmustine	halfpercDMSO	2	A	1	QX318	q75.norm.EXT	-0.00419341968621143
121	20140512	RIAILs	1	e	carmustine	halfpercDMSO	2	A	1	QX89	q75.norm.EXT	0.120745483318982
122	20140513	RIAILs	1	f	carmustine	halfpercDMSO	2	A	1	QX184	q75.norm.EXT	0.0398729267433543
123	20140520	RIAILs	1	h	carmustine	halfpercDMSO	2	A	1	QX297	q75.norm.EXT	0.144501657620366
124	20140527	RIAILs	1	j	carmustine	halfpercDMSO	2	A	1	QX218	q75.norm.EXT	-0.0144325290423792
125	20140603	RIAILs	1	k	carmustine	halfpercDMSO	2	A	1	QX137	q75.norm.EXT	0.396487198291123
126	20140623	RIAILs	1	l	carmustine	halfpercDMSO	2	A	1	QX364	q75.norm.EXT	0.254207134587561
127	20140429	RIAILs	1	b	carmustine	halfpercDMSO	2	A	1	QX318	q75.TOF	-34.4937966792428
128	20140512	RIAILs	1	e	carmustine	halfpercDMSO	2	A	1	QX89	q75.TOF	50.3299889897735
129	20140513	RIAILs	1	f	carmustine	halfpercDMSO	2	A	1	QX184	q75.TOF	-112.813649314956
130	20140520	RIAILs	1	h	carmustine	halfpercDMSO	2	A	1	QX297	q75.TOF	9.41934155652978
131	20140527	RIAILs	1	j	carmustine	halfpercDMSO	2	A	1	QX218	q75.TOF	7.48346294473289
132	20140603	RIAILs	1	k	carmustine	halfpercDMSO	2	A	1	QX137	q75.TOF	18.1668563984551
133	20140623	RIAILs	1	l	carmustine	halfpercDMSO	2	A	1	QX364	q75.TOF	-7.46271229385687
134	20140429	RIAILs	1	b	carmustine	halfpercDMSO	2	A	1	QX318	q90.EXT	-164.528340294089
135	20140512	RIAILs	1	e	carmustine	halfpercDMSO	2	A	1	QX89	q90.EXT	164.242548872635
136	20140513	RIAILs	1	f	carmustine	halfpercDMSO	2	A	1	QX184	q90.EXT	-296.810950959208
137	20140520	RIAILs	1	h	carmustine	halfpercDMSO	2	A	1	QX297	q90.EXT	-80.9234482662601
138	20140527	RIAILs	1	j	carmustine	halfpercDMSO	2	A	1	QX218	q90.EXT	-81.1881438001684
139	20140603	RIAILs	1	k	carmustine	halfpercDMSO	2	A	1	QX137	q90.EXT	148.363621663687
140	20140623	RIAILs	1	l	carmustine	halfpercDMSO	2	A	1	QX364	q90.EXT	-35.3783056857385
141	20140429	RIAILs	1	b	carmustine	halfpercDMSO	2	A	1	QX318	q90.norm.EXT	-0.133098918674487
142	20140512	RIAILs	1	e	carmustine	halfpercDMSO	2	A	1	QX89	q90.norm.EXT	0.0735475856785028
143	20140513	RIAILs	1	f	carmustine	halfpercDMSO	2	A	1	QX184	q90.norm.EXT	0.348954074674536
144	20140520	RIAILs	1	h	carmustine	halfpercDMSO	2	A	1	QX297	q90.norm.EXT	0.095007880339769
145	20140527	RIAILs	1	j	carmustine	halfpercDMSO	2	A	1	QX218	q90.norm.EXT	-0.0940557812208974
146	20140603	RIAILs	1	k	carmustine	halfpercDMSO	2	A	1	QX137	q90.norm.EXT	0.491199792450964
147	20140623	RIAILs	1	l	carmustine	halfpercDMSO	2	A	1	QX364	q90.norm.EXT	0.505100743975081
148	20140429	RIAILs	1	b	carmustine	halfpercDMSO	2	A	1	QX318	q90.TOF	-54.5356067710351
149	20140512	RIAILs	1	e	carmustine	halfpercDMSO	2	A	1	QX89	q90.TOF	43.9924262598421
150	20140513	RIAILs	1	f	carmustine	halfpercDMSO	2	A	1	QX184	q90.TOF	-88.1865251352144
151	20140520	RIAILs	1	h	carmustine	halfpercDMSO	2	A	1	QX297	q90.TOF	-23.6318861346205
152	20140527	RIAILs	1	j	carmustine	halfpercDMSO	2	A	1	QX218	q90.TOF	-16.9086811242044
153	20140603	RIAILs	1	k	carmustine	halfpercDMSO	2	A	1	QX137	q90.TOF	-20.1955871782728
154	20140623	RIAILs	1	l	carmustine	halfpercDMSO	2	A	1	QX364	q90.TOF	-42.1440989452046
155	20140429	RIAILs	1	b	carmustine	halfpercDMSO	2	A	1	QX318	var.EXT	-227387.630475826
156	20140512	RIAILs	1	e	carmustine	halfpercDMSO	2	A	1	QX89	var.EXT	47118.6478723762
157	20140513	RIAILs	1	f	carmustine	halfpercDMSO	2	A	1	QX184	var.EXT	-98152.9010916411
158	20140520	RIAILs	1	h	carmustine	halfpercDMSO	2	A	1	QX297	var.EXT	-95110.8680742242
159	20140527	RIAILs	1	j	carmustine	halfpercDMSO	2	A	1	QX218	var.EXT	-36250.0048807925
160	20140603	RIAILs	1	k	carmustine	halfpercDMSO	2	A	1	QX137	var.EXT	37706.8037857182
161	20140623	RIAILs	1	l	carmustine	halfpercDMSO	2	A	1	QX364	var.EXT	-14966.8510420789
162	20140429	RIAILs	1	b	carmustine	halfpercDMSO	2	A	1	QX318	var.TOF	-9512.36132491661
163	20140512	RIAILs	1	e	carmustine	halfpercDMSO	2	A	1	QX89	var.TOF	3821.34982887425
164	20140513	RIAILs	1	f	carmustine	halfpercDMSO	2	A	1	QX184	var.TOF	-7747.2418646289
165	20140520	RIAILs	1	h	carmustine	halfpercDMSO	2	A	1	QX297	var.TOF	-6099.83706751534
166	20140527	RIAILs	1	j	carmustine	halfpercDMSO	2	A	1	QX218	var.TOF	-5656.33998636264
167	20140603	RIAILs	1	k	carmustine	halfpercDMSO	2	A	1	QX137	var.TOF	-4564.66539941179
168	20140623	RIAILs	1	l	carmustine	halfpercDMSO	2	A	1	QX364	var.TOF	-7191.27450352618
169	20140429	RIAILs	1	b	carmustine	halfpercDMSO	2	A	3	QX171	cv.EXT	0.0183110727254701
170	20140512	RIAILs	1	e	carmustine	halfpercDMSO	2	A	3	QX112	cv.EXT	-0.0827018742797949
171	20140513	RIAILs	1	f	carmustine	halfpercDMSO	2	A	3	QX250	cv.EXT	0.107855834082305
172	20140520	RIAILs	1	h	carmustine	halfpercDMSO	2	A	3	N2	cv.EXT	-0.0521064629317381
173	20140526	RIAILs	1	i	carmustine	halfpercDMSO	2	A	3	QX299	cv.EXT	0.0121243626971148
174	20140527	RIAILs	1	j	carmustine	halfpercDMSO	2	A	3	QX198	cv.EXT	-0.158670652907519
175	20140603	RIAILs	1	k	carmustine	halfpercDMSO	2	A	3	QX311	cv.EXT	-0.151193332662183
176	20140623	RIAILs	1	l	carmustine	halfpercDMSO	2	A	3	QX358	cv.EXT	0.0701620305375006
177	20140624	RIAILs	1	m	carmustine	halfpercDMSO	2	A	3	QX486	cv.EXT	-0.0488102273313278
178	20140429	RIAILs	1	b	carmustine	halfpercDMSO	2	A	3	QX171	cv.TOF	-0.00276003514352194
179	20140512	RIAILs	1	e	carmustine	halfpercDMSO	2	A	3	QX112	cv.TOF	-0.0202274347392159
180	20140513	RIAILs	1	f	carmustine	halfpercDMSO	2	A	3	QX250	cv.TOF	0.0550352853847927
181	20140520	RIAILs	1	h	carmustine	halfpercDMSO	2	A	3	N2	cv.TOF	-0.0283444200100803
182	20140526	RIAILs	1	i	carmustine	halfpercDMSO	2	A	3	QX299	cv.TOF	-0.00155970923541277
183	20140527	RIAILs	1	j	carmustine	halfpercDMSO	2	A	3	QX198	cv.TOF	-0.0604105655951014
184	20140603	RIAILs	1	k	carmustine	halfpercDMSO	2	A	3	QX311	cv.TOF	-0.0786483747524314
185	20140623	RIAILs	1	l	carmustine	halfpercDMSO	2	A	3	QX358	cv.TOF	0.0362750036472305
186	20140624	RIAILs	1	m	carmustine	halfpercDMSO	2	A	3	QX486	cv.TOF	-0.0231291712908243
187	20140429	RIAILs	1	b	carmustine	halfpercDMSO	2	A	3	QX171	mean.EXT	24.2152849456823
188	20140512	RIAILs	1	e	carmustine	halfpercDMSO	2	A	3	QX112	mean.EXT	81.0254580763363
189	20140513	RIAILs	1	f	carmustine	halfpercDMSO	2	A	3	QX250	mean.EXT	-27.0795976051652
190	20140520	RIAILs	1	h	carmustine	halfpercDMSO	2	A	3	N2	mean.EXT	-0.160976955114721
191	20140526	RIAILs	1	i	carmustine	halfpercDMSO	2	A	3	QX299	mean.EXT	62.2494216134842
192	20140527	RIAILs	1	j	carmustine	halfpercDMSO	2	A	3	QX198	mean.EXT	84.8548454854968
193	20140603	RIAILs	1	k	carmustine	halfpercDMSO	2	A	3	QX311	mean.EXT	397.902291479397
194	20140623	RIAILs	1	l	carmustine	halfpercDMSO	2	A	3	QX358	mean.EXT	62.1930459820712
195	20140624	RIAILs	1	m	carmustine	halfpercDMSO	2	A	3	QX486	mean.EXT	98.9030700525782
196	20140429	RIAILs	1	b	carmustine	halfpercDMSO	2	A	3	QX171	mean.norm.EXT	0.191755681724693
197	20140512	RIAILs	1	e	carmustine	halfpercDMSO	2	A	3	QX112	mean.norm.EXT	-0.0577115648500132
198	20140513	RIAILs	1	f	carmustine	halfpercDMSO	2	A	3	QX250	mean.norm.EXT	0.101485846726327
199	20140520	RIAILs	1	h	carmustine	halfpercDMSO	2	A	3	N2	mean.norm.EXT	-0.00336011392866113
200	20140526	RIAILs	1	i	carmustine	halfpercDMSO	2	A	3	QX299	mean.norm.EXT	0.107903505205528
201	20140527	RIAILs	1	j	carmustine	halfpercDMSO	2	A	3	QX198	mean.norm.EXT	0.221472391727282
202	20140603	RIAILs	1	k	carmustine	halfpercDMSO	2	A	3	QX311	mean.norm.EXT	0.311969495953927
203	20140623	RIAILs	1	l	carmustine	halfpercDMSO	2	A	3	QX358	mean.norm.EXT	0.209012029740001
204	20140624	RIAILs	1	m	carmustine	halfpercDMSO	2	A	3	QX486	mean.norm.EXT	0.227678714336981
205	20140429	RIAILs	1	b	carmustine	halfpercDMSO	2	A	3	QX171	mean.TOF	-13.8257000414511
206	20140512	RIAILs	1	e	carmustine	halfpercDMSO	2	A	3	QX112	mean.TOF	24.3466315063201
207	20140513	RIAILs	1	f	carmustine	halfpercDMSO	2	A	3	QX250	mean.TOF	-25.4741472046911
208	20140520	RIAILs	1	h	carmustine	halfpercDMSO	2	A	3	N2	mean.TOF	-3.43732041599126
209	20140526	RIAILs	1	i	carmustine	halfpercDMSO	2	A	3	QX299	mean.TOF	0.0400883058726849
210	20140527	RIAILs	1	j	carmustine	halfpercDMSO	2	A	3	QX198	mean.TOF	1.82070100784735
211	20140603	RIAILs	1	k	carmustine	halfpercDMSO	2	A	3	QX311	mean.TOF	68.7455660255945
212	20140623	RIAILs	1	l	carmustine	halfpercDMSO	2	A	3	QX358	mean.TOF	-17.2856147653296
213	20140624	RIAILs	1	m	carmustine	halfpercDMSO	2	A	3	QX486	mean.TOF	1.97800230825415
214	20140429	RIAILs	1	b	carmustine	halfpercDMSO	2	A	3	QX171	median.EXT	-37.345586163663
215	20140512	RIAILs	1	e	carmustine	halfpercDMSO	2	A	3	QX112	median.EXT	48.8544903391355
216	20140513	RIAILs	1	f	carmustine	halfpercDMSO	2	A	3	QX250	median.EXT	-9.91047814467661
217	20140520	RIAILs	1	h	carmustine	halfpercDMSO	2	A	3	N2	median.EXT	-11.1895893090919
218	20140526	RIAILs	1	i	carmustine	halfpercDMSO	2	A	3	QX299	median.EXT	-10.5498947358718
219	20140527	RIAILs	1	j	carmustine	halfpercDMSO	2	A	3	QX198	median.EXT	29.5512739413528
220	20140603	RIAILs	1	k	carmustine	halfpercDMSO	2	A	3	QX311	median.EXT	604.775492415001
221	20140623	RIAILs	1	l	carmustine	halfpercDMSO	2	A	3	QX358	median.EXT	-82.6097836125593
222	20140624	RIAILs	1	m	carmustine	halfpercDMSO	2	A	3	QX486	median.EXT	29.0419270283816
223	20140429	RIAILs	1	b	carmustine	halfpercDMSO	2	A	3	QX171	median.norm.EXT	0.249775815322401
224	20140512	RIAILs	1	e	carmustine	halfpercDMSO	2	A	3	QX112	median.norm.EXT	-0.040897135053654
225	20140513	RIAILs	1	f	carmustine	halfpercDMSO	2	A	3	QX250	median.norm.EXT	0.16190754330449
226	20140520	RIAILs	1	h	carmustine	halfpercDMSO	2	A	3	N2	median.norm.EXT	-0.0722881047638776
227	20140526	RIAILs	1	i	carmustine	halfpercDMSO	2	A	3	QX299	median.norm.EXT	0.096481608095049
228	20140527	RIAILs	1	j	carmustine	halfpercDMSO	2	A	3	QX198	median.norm.EXT	0.269627564091086
229	20140603	RIAILs	1	k	carmustine	halfpercDMSO	2	A	3	QX311	median.norm.EXT	0.649074984648156
230	20140623	RIAILs	1	l	carmustine	halfpercDMSO	2	A	3	QX358	median.norm.EXT	0.0419348309883715
231	20140624	RIAILs	1	m	carmustine	halfpercDMSO	2	A	3	QX486	median.norm.EXT	0.310951735946897
232	20140429	RIAILs	1	b	carmustine	halfpercDMSO	2	A	3	QX171	median.TOF	-12.494473542249
233	20140512	RIAILs	1	e	carmustine	halfpercDMSO	2	A	3	QX112	median.TOF	28.6527828267369
234	20140513	RIAILs	1	f	carmustine	halfpercDMSO	2	A	3	QX250	median.TOF	-53.9638924708363
235	20140520	RIAILs	1	h	carmustine	halfpercDMSO	2	A	3	N2	median.TOF	-10.1053106622424
236	20140526	RIAILs	1	i	carmustine	halfpercDMSO	2	A	3	QX299	median.TOF	9.36644980312077
237	20140527	RIAILs	1	j	carmustine	halfpercDMSO	2	A	3	QX198	median.TOF	4.14754918218087
238	20140603	RIAILs	1	k	carmustine	halfpercDMSO	2	A	3	QX311	median.TOF	145.459867247371
239	20140623	RIAILs	1	l	carmustine	halfpercDMSO	2	A	3	QX358	median.TOF	-42.9565721950365
240	20140624	RIAILs	1	m	carmustine	halfpercDMSO	2	A	3	QX486	median.TOF	-8.90730662747991
241	20140429	RIAILs	1	b	carmustine	halfpercDMSO	2	A	3	QX171	n	-14.8454220336231
242	20140512	RIAILs	1	e	carmustine	halfpercDMSO	2	A	3	QX112	n	63.3519828356133
243	20140513	RIAILs	1	f	carmustine	halfpercDMSO	2	A	3	QX250	n	-40.1681028924018
244	20140520	RIAILs	1	h	carmustine	halfpercDMSO	2	A	3	N2	n	52.1971987753374
245	20140526	RIAILs	1	i	carmustine	halfpercDMSO	2	A	3	QX299	n	-16.3425436938185
246	20140527	RIAILs	1	j	carmustine	halfpercDMSO	2	A	3	QX198	n	-42.48315834106
247	20140603	RIAILs	1	k	carmustine	halfpercDMSO	2	A	3	QX311	n	5.20925741057418
248	20140623	RIAILs	1	l	carmustine	halfpercDMSO	2	A	3	QX358	n	-85.805077159272
249	20140624	RIAILs	1	m	carmustine	halfpercDMSO	2	A	3	QX486	n	-42.194987834885
250	20140429	RIAILs	1	b	carmustine	halfpercDMSO	2	A	3	QX171	norm.n	-4.33721357142234
251	20140512	RIAILs	1	e	carmustine	halfpercDMSO	2	A	3	QX112	norm.n	21.0712254362077
252	20140513	RIAILs	1	f	carmustine	halfpercDMSO	2	A	3	QX250	norm.n	-12.6593309586371
253	20140520	RIAILs	1	h	carmustine	halfpercDMSO	2	A	3	N2	norm.n	17.7323522940612
254	20140526	RIAILs	1	i	carmustine	halfpercDMSO	2	A	3	QX299	norm.n	-4.30429414911934
255	20140527	RIAILs	1	j	carmustine	halfpercDMSO	2	A	3	QX198	norm.n	-14.4689467042626
256	20140603	RIAILs	1	k	carmustine	halfpercDMSO	2	A	3	QX311	norm.n	1.65271801533842
257	20140623	RIAILs	1	l	carmustine	halfpercDMSO	2	A	3	QX358	norm.n	-28.5835638170284
258	20140624	RIAILs	1	m	carmustine	halfpercDMSO	2	A	3	QX486	norm.n	-15.0491192984501
259	20140429	RIAILs	1	b	carmustine	halfpercDMSO	2	A	3	QX171	q10.EXT	0.275824110540739
260	20140512	RIAILs	1	e	carmustine	halfpercDMSO	2	A	3	QX112	q10.EXT	-0.289672523644719
261	20140513	RIAILs	1	f	carmustine	halfpercDMSO	2	A	3	QX250	q10.EXT	9.3990675848699
262	20140520	RIAILs	1	h	carmustine	halfpercDMSO	2	A	3	N2	q10.EXT	-10.0816595553198
263	20140526	RIAILs	1	i	carmustine	halfpercDMSO	2	A	3	QX299	q10.EXT	9.65718527565976
264	20140527	RIAILs	1	j	carmustine	halfpercDMSO	2	A	3	QX198	q10.EXT	11.312721078508
265	20140603	RIAILs	1	k	carmustine	halfpercDMSO	2	A	3	QX311	q10.EXT	-3.7053736485081
266	20140623	RIAILs	1	l	carmustine	halfpercDMSO	2	A	3	QX358	q10.EXT	9.05173501338638
267	20140624	RIAILs	1	m	carmustine	halfpercDMSO	2	A	3	QX486	q10.EXT	14.5175329199104
268	20140429	RIAILs	1	b	carmustine	halfpercDMSO	2	A	3	QX171	q10.norm.EXT	0.0984214867018339
269	20140512	RIAILs	1	e	carmustine	halfpercDMSO	2	A	3	QX112	q10.norm.EXT	-0.0924068415543372
270	20140513	RIAILs	1	f	carmustine	halfpercDMSO	2	A	3	QX250	q10.norm.EXT	0.101666568932998
271	20140520	RIAILs	1	h	carmustine	halfpercDMSO	2	A	3	N2	q10.norm.EXT	0.00409775913952703
272	20140526	RIAILs	1	i	carmustine	halfpercDMSO	2	A	3	QX299	q10.norm.EXT	0.0399585986557591
273	20140527	RIAILs	1	j	carmustine	halfpercDMSO	2	A	3	QX198	q10.norm.EXT	0.105623356566155
274	20140603	RIAILs	1	k	carmustine	halfpercDMSO	2	A	3	QX311	q10.norm.EXT	0.00182816850096107
275	20140623	RIAILs	1	l	carmustine	halfpercDMSO	2	A	3	QX358	q10.norm.EXT	0.0576132134020935
276	20140624	RIAILs	1	m	carmustine	halfpercDMSO	2	A	3	QX486	q10.norm.EXT	0.0984096130290009
277	20140429	RIAILs	1	b	carmustine	halfpercDMSO	2	A	3	QX171	q10.TOF	-3.0817308153073
278	20140512	RIAILs	1	e	carmustine	halfpercDMSO	2	A	3	QX112	q10.TOF	8.03787450492463
279	20140513	RIAILs	1	f	carmustine	halfpercDMSO	2	A	3	QX250	q10.TOF	-4.49988092177632
280	20140520	RIAILs	1	h	carmustine	halfpercDMSO	2	A	3	N2	q10.TOF	-1.93994786691912
281	20140526	RIAILs	1	i	carmustine	halfpercDMSO	2	A	3	QX299	q10.TOF	0.956355385021979
282	20140527	RIAILs	1	j	carmustine	halfpercDMSO	2	A	3	QX198	q10.TOF	0.21096475733324
283	20140603	RIAILs	1	k	carmustine	halfpercDMSO	2	A	3	QX311	q10.TOF	-4.19769773816686
284	20140623	RIAILs	1	l	carmustine	halfpercDMSO	2	A	3	QX358	q10.TOF	2.77316138959742
285	20140624	RIAILs	1	m	carmustine	halfpercDMSO	2	A	3	QX486	q10.TOF	-6.91370070890527
286	20140429	RIAILs	1	b	carmustine	halfpercDMSO	2	A	3	QX171	q25.EXT	-9.19419317993689
287	20140512	RIAILs	1	e	carmustine	halfpercDMSO	2	A	3	QX112	q25.EXT	44.3235711256729
288	20140513	RIAILs	1	f	carmustine	halfpercDMSO	2	A	3	QX250	q25.EXT	-17.118351180141
289	20140520	RIAILs	1	h	carmustine	halfpercDMSO	2	A	3	N2	q25.EXT	-16.265765423213
290	20140526	RIAILs	1	i	carmustine	halfpercDMSO	2	A	3	QX299	q25.EXT	6.3733440478383
291	20140527	RIAILs	1	j	carmustine	halfpercDMSO	2	A	3	QX198	q25.EXT	3.88313078252802
292	20140603	RIAILs	1	k	carmustine	halfpercDMSO	2	A	3	QX311	q25.EXT	30.9188873431517
293	20140623	RIAILs	1	l	carmustine	halfpercDMSO	2	A	3	QX358	q25.EXT	-35.5968776701656
294	20140624	RIAILs	1	m	carmustine	halfpercDMSO	2	A	3	QX486	q25.EXT	40.4750930139321
295	20140429	RIAILs	1	b	carmustine	halfpercDMSO	2	A	3	QX171	q25.norm.EXT	0.147070734792407
296	20140512	RIAILs	1	e	carmustine	halfpercDMSO	2	A	3	QX112	q25.norm.EXT	0.0167683175862485
297	20140513	RIAILs	1	f	carmustine	halfpercDMSO	2	A	3	QX250	q25.norm.EXT	0.214847342569816
298	20140520	RIAILs	1	h	carmustine	halfpercDMSO	2	A	3	N2	q25.norm.EXT	-0.0784527190819178
299	20140526	RIAILs	1	i	carmustine	halfpercDMSO	2	A	3	QX299	q25.norm.EXT	0.159222730262353
300	20140527	RIAILs	1	j	carmustine	halfpercDMSO	2	A	3	QX198	q25.norm.EXT	0.171181254133723
301	20140603	RIAILs	1	k	carmustine	halfpercDMSO	2	A	3	QX311	q25.norm.EXT	0.18657170483401
302	20140623	RIAILs	1	l	carmustine	halfpercDMSO	2	A	3	QX358	q25.norm.EXT	0.0435898342588792
303	20140624	RIAILs	1	m	carmustine	halfpercDMSO	2	A	3	QX486	q25.norm.EXT	0.237668210289242
304	20140429	RIAILs	1	b	carmustine	halfpercDMSO	2	A	3	QX171	q25.TOF	-12.6777032507164
305	20140512	RIAILs	1	e	carmustine	halfpercDMSO	2	A	3	QX112	q25.TOF	14.3676316488565
306	20140513	RIAILs	1	f	carmustine	halfpercDMSO	2	A	3	QX250	q25.TOF	-10.6803127766703
307	20140520	RIAILs	1	h	carmustine	halfpercDMSO	2	A	3	N2	q25.TOF	-4.08436624393953
308	20140526	RIAILs	1	i	carmustine	halfpercDMSO	2	A	3	QX299	q25.TOF	-4.12701596039604
309	20140527	RIAILs	1	j	carmustine	halfpercDMSO	2	A	3	QX198	q25.TOF	-8.06731908623478
310	20140603	RIAILs	1	k	carmustine	halfpercDMSO	2	A	3	QX311	q25.TOF	9.0113887383448
311	20140623	RIAILs	1	l	carmustine	halfpercDMSO	2	A	3	QX358	q25.TOF	-23.1594266800588
312	20140624	RIAILs	1	m	carmustine	halfpercDMSO	2	A	3	QX486	q25.TOF	6.07439132145466
313	20140429	RIAILs	1	b	carmustine	halfpercDMSO	2	A	3	QX171	q75.EXT	88.1409700931321
314	20140512	RIAILs	1	e	carmustine	halfpercDMSO	2	A	3	QX112	q75.EXT	270.382376704969
315	20140513	RIAILs	1	f	carmustine	halfpercDMSO	2	A	3	QX250	q75.EXT	-182.237119778498
316	20140520	RIAILs	1	h	carmustine	halfpercDMSO	2	A	3	N2	q75.EXT	71.156505844378
317	20140526	RIAILs	1	i	carmustine	halfpercDMSO	2	A	3	QX299	q75.EXT	78.1739561699992
318	20140527	RIAILs	1	j	carmustine	halfpercDMSO	2	A	3	QX198	q75.EXT	256.227277919262
319	20140603	RIAILs	1	k	carmustine	halfpercDMSO	2	A	3	QX311	q75.EXT	670.743103934245
320	20140623	RIAILs	1	l	carmustine	halfpercDMSO	2	A	3	QX358	q75.EXT	108.762316864904
321	20140624	RIAILs	1	m	carmustine	halfpercDMSO	2	A	3	QX486	q75.EXT	244.342114138338
322	20140429	RIAILs	1	b	carmustine	halfpercDMSO	2	A	3	QX171	q75.norm.EXT	0.0790057237895075
323	20140512	RIAILs	1	e	carmustine	halfpercDMSO	2	A	3	QX112	q75.norm.EXT	-0.0921006061634798
324	20140513	RIAILs	1	f	carmustine	halfpercDMSO	2	A	3	QX250	q75.norm.EXT	-0.0134996885514795
325	20140520	RIAILs	1	h	carmustine	halfpercDMSO	2	A	3	N2	q75.norm.EXT	0.0214148450777728
326	20140526	RIAILs	1	i	carmustine	halfpercDMSO	2	A	3	QX299	q75.norm.EXT	-0.0882504321944155
327	20140527	RIAILs	1	j	carmustine	halfpercDMSO	2	A	3	QX198	q75.norm.EXT	0.465332215569299
328	20140603	RIAILs	1	k	carmustine	halfpercDMSO	2	A	3	QX311	q75.norm.EXT	0.350370358054219
329	20140623	RIAILs	1	l	carmustine	halfpercDMSO	2	A	3	QX358	q75.norm.EXT	0.435173350104011
330	20140624	RIAILs	1	m	carmustine	halfpercDMSO	2	A	3	QX486	q75.norm.EXT	0.22794274053069
331	20140429	RIAILs	1	b	carmustine	halfpercDMSO	2	A	3	QX171	q75.TOF	-21.4995394658672
332	20140512	RIAILs	1	e	carmustine	halfpercDMSO	2	A	3	QX112	q75.TOF	52.8595268162039
333	20140513	RIAILs	1	f	carmustine	halfpercDMSO	2	A	3	QX250	q75.TOF	-39.2060542233956
334	20140520	RIAILs	1	h	carmustine	halfpercDMSO	2	A	3	N2	q75.TOF	28.7420091321668
335	20140526	RIAILs	1	i	carmustine	halfpercDMSO	2	A	3	QX299	q75.TOF	-30.220158791974
336	20140527	RIAILs	1	j	carmustine	halfpercDMSO	2	A	3	QX198	q75.TOF	44.1524754367688
337	20140603	RIAILs	1	k	carmustine	halfpercDMSO	2	A	3	QX311	q75.TOF	92.2020193124662
338	20140623	RIAILs	1	l	carmustine	halfpercDMSO	2	A	3	QX358	q75.TOF	2.1480484386255
339	20140624	RIAILs	1	m	carmustine	halfpercDMSO	2	A	3	QX486	q75.TOF	25.4356557548189
340	20140429	RIAILs	1	b	carmustine	halfpercDMSO	2	A	3	QX171	q90.EXT	79.0754221518354
341	20140512	RIAILs	1	e	carmustine	halfpercDMSO	2	A	3	QX112	q90.EXT	98.1059373158625
342	20140513	RIAILs	1	f	carmustine	halfpercDMSO	2	A	3	QX250	q90.EXT	-132.1861695011
343	20140520	RIAILs	1	h	carmustine	halfpercDMSO	2	A	3	N2	q90.EXT	107.980325389145
344	20140526	RIAILs	1	i	carmustine	halfpercDMSO	2	A	3	QX299	q90.EXT	292.360575319114
345	20140527	RIAILs	1	j	carmustine	halfpercDMSO	2	A	3	QX198	q90.EXT	344.418514397112
346	20140603	RIAILs	1	k	carmustine	halfpercDMSO	2	A	3	QX311	q90.EXT	397.512280520405
347	20140623	RIAILs	1	l	carmustine	halfpercDMSO	2	A	3	QX358	q90.EXT	473.019809354805
348	20140624	RIAILs	1	m	carmustine	halfpercDMSO	2	A	3	QX486	q90.EXT	168.103463610649
349	20140429	RIAILs	1	b	carmustine	halfpercDMSO	2	A	3	QX171	q90.norm.EXT	0.108616669740877
350	20140512	RIAILs	1	e	carmustine	halfpercDMSO	2	A	3	QX112	q90.norm.EXT	9.51076517492688e-05
351	20140513	RIAILs	1	f	carmustine	halfpercDMSO	2	A	3	QX250	q90.norm.EXT	-0.0656014647077504
352	20140520	RIAILs	1	h	carmustine	halfpercDMSO	2	A	3	N2	q90.norm.EXT	-0.0325475843880513
353	20140526	RIAILs	1	i	carmustine	halfpercDMSO	2	A	3	QX299	q90.norm.EXT	0.335174079783274
354	20140527	RIAILs	1	j	carmustine	halfpercDMSO	2	A	3	QX198	q90.norm.EXT	0.474715853699798
355	20140603	RIAILs	1	k	carmustine	halfpercDMSO	2	A	3	QX311	q90.norm.EXT	0.278744855271292
356	20140623	RIAILs	1	l	carmustine	halfpercDMSO	2	A	3	QX358	q90.norm.EXT	0.594981416060726
357	20140624	RIAILs	1	m	carmustine	halfpercDMSO	2	A	3	QX486	q90.norm.EXT	0.159192898875353
358	20140429	RIAILs	1	b	carmustine	halfpercDMSO	2	A	3	QX171	q90.TOF	-7.51239141920301
359	20140512	RIAILs	1	e	carmustine	halfpercDMSO	2	A	3	QX112	q90.TOF	55.9235391550427
360	20140513	RIAILs	1	f	carmustine	halfpercDMSO	2	A	3	QX250	q90.TOF	-44.0863686505348
361	20140520	RIAILs	1	h	carmustine	halfpercDMSO	2	A	3	N2	q90.TOF	8.86046669749864
362	20140526	RIAILs	1	i	carmustine	halfpercDMSO	2	A	3	QX299	q90.TOF	29.8775177952002
363	20140527	RIAILs	1	j	carmustine	halfpercDMSO	2	A	3	QX198	q90.TOF	14.5990599344843
364	20140603	RIAILs	1	k	carmustine	halfpercDMSO	2	A	3	QX311	q90.TOF	48.8510000100713
365	20140623	RIAILs	1	l	carmustine	halfpercDMSO	2	A	3	QX358	q90.TOF	19.7402155073342
366	20140624	RIAILs	1	m	carmustine	halfpercDMSO	2	A	3	QX486	q90.TOF	-27.7864184621893
367	20140429	RIAILs	1	b	carmustine	halfpercDMSO	2	A	3	QX171	var.EXT	67952.9678202958
368	20140512	RIAILs	1	e	carmustine	halfpercDMSO	2	A	3	QX112	var.EXT	18289.1420774792
369	20140513	RIAILs	1	f	carmustine	halfpercDMSO	2	A	3	QX250	var.EXT	153553.212226466
370	20140520	RIAILs	1	h	carmustine	halfpercDMSO	2	A	3	N2	var.EXT	-61609.9032761969
371	20140526	RIAILs	1	i	carmustine	halfpercDMSO	2	A	3	QX299	var.EXT	162155.51820196
372	20140527	RIAILs	1	j	carmustine	halfpercDMSO	2	A	3	QX198	var.EXT	-12015.1767059619
373	20140603	RIAILs	1	k	carmustine	halfpercDMSO	2	A	3	QX311	var.EXT	471698.579284873
374	20140623	RIAILs	1	l	carmustine	halfpercDMSO	2	A	3	QX358	var.EXT	213164.448785706
375	20140624	RIAILs	1	m	carmustine	halfpercDMSO	2	A	3	QX486	var.EXT	37802.4342179686
376	20140429	RIAILs	1	b	carmustine	halfpercDMSO	2	A	3	QX171	var.TOF	-2795.3593106225
377	20140512	RIAILs	1	e	carmustine	halfpercDMSO	2	A	3	QX112	var.TOF	1238.18844104044
378	20140513	RIAILs	1	f	carmustine	halfpercDMSO	2	A	3	QX250	var.TOF	-1249.61443343827
379	20140520	RIAILs	1	h	carmustine	halfpercDMSO	2	A	3	N2	var.TOF	-2119.78663131248
380	20140526	RIAILs	1	i	carmustine	halfpercDMSO	2	A	3	QX299	var.TOF	762.634672906828
381	20140527	RIAILs	1	j	carmustine	halfpercDMSO	2	A	3	QX198	var.TOF	-3029.90216287581
382	20140603	RIAILs	1	k	carmustine	halfpercDMSO	2	A	3	QX311	var.TOF	11690.2328927126
383	20140623	RIAILs	1	l	carmustine	halfpercDMSO	2	A	3	QX358	var.TOF	1453.99215311856
384	20140624	RIAILs	1	m	carmustine	halfpercDMSO	2	A	3	QX486	var.TOF	-4860.19734454858
385	20140429	RIAILs	1	b	carmustine	halfpercDMSO	2	A	5	QX269	cv.EXT	0.102537721056269
386	20140513	RIAILs	1	f	carmustine	halfpercDMSO	2	A	5	QX174	cv.EXT	0.0416710770746336
387	20140520	RIAILs	1	h	carmustine	halfpercDMSO	2	A	5	QX172	cv.EXT	-0.0603568366490995
388	20140526	RIAILs	1	i	carmustine	halfpercDMSO	2	A	5	QX314	cv.EXT	-0.076458288361135
389	20140603	RIAILs	1	k	carmustine	halfpercDMSO	2	A	5	QX92	cv.EXT	-0.0932101501345526
390	20140623	RIAILs	1	l	carmustine	halfpercDMSO	2	A	5	QX565	cv.EXT	0.111581176182841
391	20140624	RIAILs	1	m	carmustine	halfpercDMSO	2	A	5	QX313	cv.EXT	-0.149211801851011
392	20140429	RIAILs	1	b	carmustine	halfpercDMSO	2	A	5	QX269	cv.TOF	0.0327106254979836
393	20140513	RIAILs	1	f	carmustine	halfpercDMSO	2	A	5	QX174	cv.TOF	-0.0137829766113312
394	20140520	RIAILs	1	h	carmustine	halfpercDMSO	2	A	5	QX172	cv.TOF	-0.0198997411524916
395	20140526	RIAILs	1	i	carmustine	halfpercDMSO	2	A	5	QX314	cv.TOF	-0.0599081368599345
396	20140603	RIAILs	1	k	carmustine	halfpercDMSO	2	A	5	QX92	cv.TOF	-0.0600446312902174
397	20140623	RIAILs	1	l	carmustine	halfpercDMSO	2	A	5	QX565	cv.TOF	0.0491049276475782
398	20140624	RIAILs	1	m	carmustine	halfpercDMSO	2	A	5	QX313	cv.TOF	-0.0884093901055511
399	20140429	RIAILs	1	b	carmustine	halfpercDMSO	2	A	5	QX269	mean.EXT	51.0840409157169
400	20140513	RIAILs	1	f	carmustine	halfpercDMSO	2	A	5	QX174	mean.EXT	-51.4063380459696
401	20140520	RIAILs	1	h	carmustine	halfpercDMSO	2	A	5	QX172	mean.EXT	131.185997802016
402	20140526	RIAILs	1	i	carmustine	halfpercDMSO	2	A	5	QX314	mean.EXT	-11.5523101607479
403	20140603	RIAILs	1	k	carmustine	halfpercDMSO	2	A	5	QX92	mean.EXT	104.937829716586
404	20140623	RIAILs	1	l	carmustine	halfpercDMSO	2	A	5	QX565	mean.EXT	-58.9677873800807
405	20140624	RIAILs	1	m	carmustine	halfpercDMSO	2	A	5	QX313	mean.EXT	83.6739274160516
406	20140429	RIAILs	1	b	carmustine	halfpercDMSO	2	A	5	QX269	mean.norm.EXT	0.114132541090649
407	20140513	RIAILs	1	f	carmustine	halfpercDMSO	2	A	5	QX174	mean.norm.EXT	-0.0171335011247909
408	20140520	RIAILs	1	h	carmustine	halfpercDMSO	2	A	5	QX172	mean.norm.EXT	0.269050973624745
409	20140526	RIAILs	1	i	carmustine	halfpercDMSO	2	A	5	QX314	mean.norm.EXT	0.143464197302413
410	20140603	RIAILs	1	k	carmustine	halfpercDMSO	2	A	5	QX92	mean.norm.EXT	0.130526407716161
411	20140623	RIAILs	1	l	carmustine	halfpercDMSO	2	A	5	QX565	mean.norm.EXT	0.0726534153236515
412	20140624	RIAILs	1	m	carmustine	halfpercDMSO	2	A	5	QX313	mean.norm.EXT	0.0656345753567554
413	20140429	RIAILs	1	b	carmustine	halfpercDMSO	2	A	5	QX269	mean.TOF	-6.9841752005338
414	20140513	RIAILs	1	f	carmustine	halfpercDMSO	2	A	5	QX174	mean.TOF	-22.5337948555002
415	20140520	RIAILs	1	h	carmustine	halfpercDMSO	2	A	5	QX172	mean.TOF	10.3437726743241
416	20140526	RIAILs	1	i	carmustine	halfpercDMSO	2	A	5	QX314	mean.TOF	-10.3778399799493
417	20140603	RIAILs	1	k	carmustine	halfpercDMSO	2	A	5	QX92	mean.TOF	8.07761071098363
418	20140623	RIAILs	1	l	carmustine	halfpercDMSO	2	A	5	QX565	mean.TOF	-43.5523087969688
419	20140624	RIAILs	1	m	carmustine	halfpercDMSO	2	A	5	QX313	mean.TOF	32.223459088681
420	20140429	RIAILs	1	b	carmustine	halfpercDMSO	2	A	5	QX269	median.EXT	-24.4615668148597
421	20140513	RIAILs	1	f	carmustine	halfpercDMSO	2	A	5	QX174	median.EXT	24.0455307024913
422	20140520	RIAILs	1	h	carmustine	halfpercDMSO	2	A	5	QX172	median.EXT	107.773837419594
423	20140526	RIAILs	1	i	carmustine	halfpercDMSO	2	A	5	QX314	median.EXT	26.7061181633286
424	20140603	RIAILs	1	k	carmustine	halfpercDMSO	2	A	5	QX92	median.EXT	-104.980024608087
425	20140623	RIAILs	1	l	carmustine	halfpercDMSO	2	A	5	QX565	median.EXT	-114.28062417073
426	20140624	RIAILs	1	m	carmustine	halfpercDMSO	2	A	5	QX313	median.EXT	35.0178754315801
427	20140429	RIAILs	1	b	carmustine	halfpercDMSO	2	A	5	QX269	median.norm.EXT	-0.0302140955891262
428	20140513	RIAILs	1	f	carmustine	halfpercDMSO	2	A	5	QX174	median.norm.EXT	0.129941989475909
429	20140520	RIAILs	1	h	carmustine	halfpercDMSO	2	A	5	QX172	median.norm.EXT	0.487427196814397
430	20140526	RIAILs	1	i	carmustine	halfpercDMSO	2	A	5	QX314	median.norm.EXT	0.190785974553923
431	20140603	RIAILs	1	k	carmustine	halfpercDMSO	2	A	5	QX92	median.norm.EXT	0.184716670125382
432	20140623	RIAILs	1	l	carmustine	halfpercDMSO	2	A	5	QX565	median.norm.EXT	0.0100341580171752
433	20140624	RIAILs	1	m	carmustine	halfpercDMSO	2	A	5	QX313	median.norm.EXT	0.114483880943031
434	20140429	RIAILs	1	b	carmustine	halfpercDMSO	2	A	5	QX269	median.TOF	-20.3367024175642
435	20140513	RIAILs	1	f	carmustine	halfpercDMSO	2	A	5	QX174	median.TOF	2.16719202790385
436	20140520	RIAILs	1	h	carmustine	halfpercDMSO	2	A	5	QX172	median.TOF	22.7541310496818
437	20140526	RIAILs	1	i	carmustine	halfpercDMSO	2	A	5	QX314	median.TOF	-8.54300260127391
438	20140603	RIAILs	1	k	carmustine	halfpercDMSO	2	A	5	QX92	median.TOF	4.98543302017604
439	20140623	RIAILs	1	l	carmustine	halfpercDMSO	2	A	5	QX565	median.TOF	-52.1887989318573
440	20140624	RIAILs	1	m	carmustine	halfpercDMSO	2	A	5	QX313	median.TOF	41.1721393614325
441	20140429	RIAILs	1	b	carmustine	halfpercDMSO	2	A	5	QX269	n	-6.71902885411577
442	20140513	RIAILs	1	f	carmustine	halfpercDMSO	2	A	5	QX174	n	-6.59145266654212
443	20140520	RIAILs	1	h	carmustine	halfpercDMSO	2	A	5	QX172	n	-15.222398180671
444	20140526	RIAILs	1	i	carmustine	halfpercDMSO	2	A	5	QX314	n	44.1757886058589
445	20140603	RIAILs	1	k	carmustine	halfpercDMSO	2	A	5	QX92	n	-20.5947730293408
446	20140623	RIAILs	1	l	carmustine	halfpercDMSO	2	A	5	QX565	n	5.67734110467697
447	20140624	RIAILs	1	m	carmustine	halfpercDMSO	2	A	5	QX313	n	83.5836364600706
448	20140429	RIAILs	1	b	carmustine	halfpercDMSO	2	A	5	QX269	norm.n	-1.6994843726366
449	20140513	RIAILs	1	f	carmustine	halfpercDMSO	2	A	5	QX174	norm.n	-1.57469501552115
450	20140520	RIAILs	1	h	carmustine	halfpercDMSO	2	A	5	QX172	norm.n	-4.7473667396894
451	20140526	RIAILs	1	i	carmustine	halfpercDMSO	2	A	5	QX314	norm.n	15.9278157246773
452	20140603	RIAILs	1	k	carmustine	halfpercDMSO	2	A	5	QX92	norm.n	-6.88342498048941
453	20140623	RIAILs	1	l	carmustine	halfpercDMSO	2	A	5	QX565	norm.n	1.87145531380167
454	20140624	RIAILs	1	m	carmustine	halfpercDMSO	2	A	5	QX313	norm.n	26.9964056858516
455	20140429	RIAILs	1	b	carmustine	halfpercDMSO	2	A	5	QX269	q10.EXT	-10.3394540255971
456	20140513	RIAILs	1	f	carmustine	halfpercDMSO	2	A	5	QX174	q10.EXT	0.11404384805658
457	20140520	RIAILs	1	h	carmustine	halfpercDMSO	2	A	5	QX172	q10.EXT	-0.928576320989839
458	20140526	RIAILs	1	i	carmustine	halfpercDMSO	2	A	5	QX314	q10.EXT	6.79483943737627
459	20140603	RIAILs	1	k	carmustine	halfpercDMSO	2	A	5	QX92	q10.EXT	1.50852025742217
460	20140623	RIAILs	1	l	carmustine	halfpercDMSO	2	A	5	QX565	q10.EXT	-12.0661606466911
461	20140624	RIAILs	1	m	carmustine	halfpercDMSO	2	A	5	QX313	q10.EXT	29.9781926550352
462	20140429	RIAILs	1	b	carmustine	halfpercDMSO	2	A	5	QX269	q10.norm.EXT	0.0423428754923161
463	20140513	RIAILs	1	f	carmustine	halfpercDMSO	2	A	5	QX174	q10.norm.EXT	0.0103013445117607
464	20140520	RIAILs	1	h	carmustine	halfpercDMSO	2	A	5	QX172	q10.norm.EXT	0.0573995221098084
465	20140526	RIAILs	1	i	carmustine	halfpercDMSO	2	A	5	QX314	q10.norm.EXT	0.0462980640164379
466	20140603	RIAILs	1	k	carmustine	halfpercDMSO	2	A	5	QX92	q10.norm.EXT	0.045386302316613
467	20140623	RIAILs	1	l	carmustine	halfpercDMSO	2	A	5	QX565	q10.norm.EXT	-0.0807372908791847
468	20140624	RIAILs	1	m	carmustine	halfpercDMSO	2	A	5	QX313	q10.norm.EXT	0.0385471086622217
469	20140429	RIAILs	1	b	carmustine	halfpercDMSO	2	A	5	QX269	q10.TOF	-7.79129417858522
470	20140513	RIAILs	1	f	carmustine	halfpercDMSO	2	A	5	QX174	q10.TOF	-3.87638782800118
471	20140520	RIAILs	1	h	carmustine	halfpercDMSO	2	A	5	QX172	q10.TOF	-5.95429291183629
472	20140526	RIAILs	1	i	carmustine	halfpercDMSO	2	A	5	QX314	q10.TOF	3.97984847879712
473	20140603	RIAILs	1	k	carmustine	halfpercDMSO	2	A	5	QX92	q10.TOF	8.47989121187337
474	20140623	RIAILs	1	l	carmustine	halfpercDMSO	2	A	5	QX565	q10.TOF	-8.52247224318366
475	20140624	RIAILs	1	m	carmustine	halfpercDMSO	2	A	5	QX313	q10.TOF	9.33328547864501
476	20140429	RIAILs	1	b	carmustine	halfpercDMSO	2	A	5	QX269	q25.EXT	-32.1859173345688
477	20140513	RIAILs	1	f	carmustine	halfpercDMSO	2	A	5	QX174	q25.EXT	19.2230835630346
478	20140520	RIAILs	1	h	carmustine	halfpercDMSO	2	A	5	QX172	q25.EXT	6.73450153954078
479	20140526	RIAILs	1	i	carmustine	halfpercDMSO	2	A	5	QX314	q25.EXT	26.9003072859718
480	20140603	RIAILs	1	k	carmustine	halfpercDMSO	2	A	5	QX92	q25.EXT	8.89299195603339
481	20140623	RIAILs	1	l	carmustine	halfpercDMSO	2	A	5	QX565	q25.EXT	-67.0562993315884
482	20140624	RIAILs	1	m	carmustine	halfpercDMSO	2	A	5	QX313	q25.EXT	110.488441151622
483	20140429	RIAILs	1	b	carmustine	halfpercDMSO	2	A	5	QX269	q25.norm.EXT	-0.0277610460714898
484	20140513	RIAILs	1	f	carmustine	halfpercDMSO	2	A	5	QX174	q25.norm.EXT	0.0740669556816925
485	20140520	RIAILs	1	h	carmustine	halfpercDMSO	2	A	5	QX172	q25.norm.EXT	0.196500900570128
486	20140526	RIAILs	1	i	carmustine	halfpercDMSO	2	A	5	QX314	q25.norm.EXT	0.0830604740633673
487	20140603	RIAILs	1	k	carmustine	halfpercDMSO	2	A	5	QX92	q25.norm.EXT	0.0648024652725022
488	20140623	RIAILs	1	l	carmustine	halfpercDMSO	2	A	5	QX565	q25.norm.EXT	-0.10249332473457
489	20140624	RIAILs	1	m	carmustine	halfpercDMSO	2	A	5	QX313	q25.norm.EXT	0.101067324384343
490	20140429	RIAILs	1	b	carmustine	halfpercDMSO	2	A	5	QX269	q25.TOF	-13.2798597662669
491	20140513	RIAILs	1	f	carmustine	halfpercDMSO	2	A	5	QX174	q25.TOF	-12.8163524144214
492	20140520	RIAILs	1	h	carmustine	halfpercDMSO	2	A	5	QX172	q25.TOF	-6.50120428393696
493	20140526	RIAILs	1	i	carmustine	halfpercDMSO	2	A	5	QX314	q25.TOF	4.31651449295101
494	20140603	RIAILs	1	k	carmustine	halfpercDMSO	2	A	5	QX92	q25.TOF	2.66026046277839
495	20140623	RIAILs	1	l	carmustine	halfpercDMSO	2	A	5	QX565	q25.TOF	-32.3637397111608
496	20140624	RIAILs	1	m	carmustine	halfpercDMSO	2	A	5	QX313	q25.TOF	28.0507766570172
497	20140429	RIAILs	1	b	carmustine	halfpercDMSO	2	A	5	QX269	q75.EXT	178.230032608747
498	20140513	RIAILs	1	f	carmustine	halfpercDMSO	2	A	5	QX174	q75.EXT	-197.898257184926
499	20140520	RIAILs	1	h	carmustine	halfpercDMSO	2	A	5	QX172	q75.EXT	215.018597378675
500	20140526	RIAILs	1	i	carmustine	halfpercDMSO	2	A	5	QX314	q75.EXT	-88.5984758315251
501	20140603	RIAILs	1	k	carmustine	halfpercDMSO	2	A	5	QX92	q75.EXT	306.250936379608
502	20140623	RIAILs	1	l	carmustine	halfpercDMSO	2	A	5	QX565	q75.EXT	-125.162557434125
503	20140624	RIAILs	1	m	carmustine	halfpercDMSO	2	A	5	QX313	q75.EXT	159.90058358527
504	20140429	RIAILs	1	b	carmustine	halfpercDMSO	2	A	5	QX269	q75.norm.EXT	0.153255972452171
505	20140513	RIAILs	1	f	carmustine	halfpercDMSO	2	A	5	QX174	q75.norm.EXT	-0.157758800307681
506	20140520	RIAILs	1	h	carmustine	halfpercDMSO	2	A	5	QX172	q75.norm.EXT	0.300935586397232
507	20140526	RIAILs	1	i	carmustine	halfpercDMSO	2	A	5	QX314	q75.norm.EXT	0.139350583756993
508	20140603	RIAILs	1	k	carmustine	halfpercDMSO	2	A	5	QX92	q75.norm.EXT	0.269187596850624
509	20140623	RIAILs	1	l	carmustine	halfpercDMSO	2	A	5	QX565	q75.norm.EXT	0.18860659157667
510	20140624	RIAILs	1	m	carmustine	halfpercDMSO	2	A	5	QX313	q75.norm.EXT	0.0816305530664737
511	20140429	RIAILs	1	b	carmustine	halfpercDMSO	2	A	5	QX269	q75.TOF	-13.3713149754224
512	20140513	RIAILs	1	f	carmustine	halfpercDMSO	2	A	5	QX174	q75.TOF	-32.144754521964
513	20140520	RIAILs	1	h	carmustine	halfpercDMSO	2	A	5	QX172	q75.TOF	35.285609677549
514	20140526	RIAILs	1	i	carmustine	halfpercDMSO	2	A	5	QX314	q75.TOF	-23.3332612720711
515	20140603	RIAILs	1	k	carmustine	halfpercDMSO	2	A	5	QX92	q75.TOF	17.3529795513209
516	20140623	RIAILs	1	l	carmustine	halfpercDMSO	2	A	5	QX565	q75.TOF	-64.9447777397196
517	20140624	RIAILs	1	m	carmustine	halfpercDMSO	2	A	5	QX313	q75.TOF	59.4091658702666
518	20140429	RIAILs	1	b	carmustine	halfpercDMSO	2	A	5	QX269	q90.EXT	262.907747184263
519	20140513	RIAILs	1	f	carmustine	halfpercDMSO	2	A	5	QX174	q90.EXT	-537.762790025456
520	20140520	RIAILs	1	h	carmustine	halfpercDMSO	2	A	5	QX172	q90.EXT	441.211768781032
521	20140526	RIAILs	1	i	carmustine	halfpercDMSO	2	A	5	QX314	q90.EXT	-14.8849556389872
522	20140603	RIAILs	1	k	carmustine	halfpercDMSO	2	A	5	QX92	q90.EXT	182.323885944792
523	20140623	RIAILs	1	l	carmustine	halfpercDMSO	2	A	5	QX565	q90.EXT	113.592128408844
524	20140624	RIAILs	1	m	carmustine	halfpercDMSO	2	A	5	QX313	q90.EXT	208.111667887731
525	20140429	RIAILs	1	b	carmustine	halfpercDMSO	2	A	5	QX269	q90.norm.EXT	0.345500816592632
526	20140513	RIAILs	1	f	carmustine	halfpercDMSO	2	A	5	QX174	q90.norm.EXT	-0.285720510272854
527	20140520	RIAILs	1	h	carmustine	halfpercDMSO	2	A	5	QX172	q90.norm.EXT	0.329765987667362
528	20140526	RIAILs	1	i	carmustine	halfpercDMSO	2	A	5	QX314	q90.norm.EXT	0.345761214507758
529	20140603	RIAILs	1	k	carmustine	halfpercDMSO	2	A	5	QX92	q90.norm.EXT	0.239386263332123
530	20140623	RIAILs	1	l	carmustine	halfpercDMSO	2	A	5	QX565	q90.norm.EXT	0.224997263107454
531	20140624	RIAILs	1	m	carmustine	halfpercDMSO	2	A	5	QX313	q90.norm.EXT	-0.0309502976923842
532	20140429	RIAILs	1	b	carmustine	halfpercDMSO	2	A	5	QX269	q90.TOF	17.0494353352653
533	20140513	RIAILs	1	f	carmustine	halfpercDMSO	2	A	5	QX174	q90.TOF	-73.7709960724332
534	20140520	RIAILs	1	h	carmustine	halfpercDMSO	2	A	5	QX172	q90.TOF	32.8141533573443
535	20140526	RIAILs	1	i	carmustine	halfpercDMSO	2	A	5	QX314	q90.TOF	-13.2685764664024
536	20140603	RIAILs	1	k	carmustine	halfpercDMSO	2	A	5	QX92	q90.TOF	7.78885246200985
537	20140623	RIAILs	1	l	carmustine	halfpercDMSO	2	A	5	QX565	q90.TOF	-21.5673142970368
538	20140624	RIAILs	1	m	carmustine	halfpercDMSO	2	A	5	QX313	q90.TOF	68.4518408499168
539	20140429	RIAILs	1	b	carmustine	halfpercDMSO	2	A	5	QX269	var.EXT	271608.626404477
540	20140513	RIAILs	1	f	carmustine	halfpercDMSO	2	A	5	QX174	var.EXT	-47090.4185990994
541	20140520	RIAILs	1	h	carmustine	halfpercDMSO	2	A	5	QX172	var.EXT	154837.353446652
542	20140526	RIAILs	1	i	carmustine	halfpercDMSO	2	A	5	QX314	var.EXT	-82079.3694300505
543	20140603	RIAILs	1	k	carmustine	halfpercDMSO	2	A	5	QX92	var.EXT	61156.9089034701
544	20140623	RIAILs	1	l	carmustine	halfpercDMSO	2	A	5	QX565	var.EXT	57216.8586030147
545	20140624	RIAILs	1	m	carmustine	halfpercDMSO	2	A	5	QX313	var.EXT	-22366.7254041943
546	20140429	RIAILs	1	b	carmustine	halfpercDMSO	2	A	5	QX269	var.TOF	2070.8668914584
547	20140513	RIAILs	1	f	carmustine	halfpercDMSO	2	A	5	QX174	var.TOF	-7709.72969982348
548	20140520	RIAILs	1	h	carmustine	halfpercDMSO	2	A	5	QX172	var.TOF	3122.6660751149
549	20140526	RIAILs	1	i	carmustine	halfpercDMSO	2	A	5	QX314	var.TOF	-6924.07232155879
550	20140603	RIAILs	1	k	carmustine	halfpercDMSO	2	A	5	QX92	var.TOF	-2493.43559699935
551	20140623	RIAILs	1	l	carmustine	halfpercDMSO	2	A	5	QX565	var.TOF	-4710.04624470799
552	20140624	RIAILs	1	m	carmustine	halfpercDMSO	2	A	5	QX313	var.TOF	-394.335262096488
553	20140429	RIAILs	1	b	carmustine	halfpercDMSO	2	A	7	QX290	cv.EXT	0.0283227439644788
554	20140512	RIAILs	1	e	carmustine	halfpercDMSO	2	A	7	QX114	cv.EXT	0.080953626450746
555	20140513	RIAILs	1	f	carmustine	halfpercDMSO	2	A	7	QX76	cv.EXT	0.0656045402366082
556	20140520	RIAILs	1	h	carmustine	halfpercDMSO	2	A	7	QX72	cv.EXT	-0.0387266656104469
557	20140526	RIAILs	1	i	carmustine	halfpercDMSO	2	A	7	QX304	cv.EXT	-0.221444003544186
558	20140603	RIAILs	1	k	carmustine	halfpercDMSO	2	A	7	QX97	cv.EXT	0.494384854218799
559	20140623	RIAILs	1	l	carmustine	halfpercDMSO	2	A	7	QX557	cv.EXT	-0.029080440202862
560	20140429	RIAILs	1	b	carmustine	halfpercDMSO	2	A	7	QX290	cv.TOF	-0.0577675034938899
561	20140512	RIAILs	1	e	carmustine	halfpercDMSO	2	A	7	QX114	cv.TOF	0.00315628062327072
562	20140513	RIAILs	1	f	carmustine	halfpercDMSO	2	A	7	QX76	cv.TOF	-0.00640278220323475
563	20140520	RIAILs	1	h	carmustine	halfpercDMSO	2	A	7	QX72	cv.TOF	-0.0120632876459902
564	20140526	RIAILs	1	i	carmustine	halfpercDMSO	2	A	7	QX304	cv.TOF	-0.107113430801144
565	20140603	RIAILs	1	k	carmustine	halfpercDMSO	2	A	7	QX97	cv.TOF	0.24466057920804
566	20140623	RIAILs	1	l	carmustine	halfpercDMSO	2	A	7	QX557	cv.TOF	-0.0410845934048813
567	20140429	RIAILs	1	b	carmustine	halfpercDMSO	2	A	7	QX290	mean.EXT	31.5511066600238
568	20140512	RIAILs	1	e	carmustine	halfpercDMSO	2	A	7	QX114	mean.EXT	-24.8785632366715
569	20140513	RIAILs	1	f	carmustine	halfpercDMSO	2	A	7	QX76	mean.EXT	-278.723705345191
570	20140520	RIAILs	1	h	carmustine	halfpercDMSO	2	A	7	QX72	mean.EXT	-8.32218188363176
571	20140526	RIAILs	1	i	carmustine	halfpercDMSO	2	A	7	QX304	mean.EXT	122.891952789013
572	20140603	RIAILs	1	k	carmustine	halfpercDMSO	2	A	7	QX97	mean.EXT	-195.91382910893
573	20140623	RIAILs	1	l	carmustine	halfpercDMSO	2	A	7	QX557	mean.EXT	-55.0814565717505
574	20140429	RIAILs	1	b	carmustine	halfpercDMSO	2	A	7	QX290	mean.norm.EXT	0.12412549300979
575	20140512	RIAILs	1	e	carmustine	halfpercDMSO	2	A	7	QX114	mean.norm.EXT	0.0110893594699302
576	20140513	RIAILs	1	f	carmustine	halfpercDMSO	2	A	7	QX76	mean.norm.EXT	-0.220583268539205
577	20140520	RIAILs	1	h	carmustine	halfpercDMSO	2	A	7	QX72	mean.norm.EXT	0.18400862789797
578	20140526	RIAILs	1	i	carmustine	halfpercDMSO	2	A	7	QX304	mean.norm.EXT	0.211476914425216
579	20140603	RIAILs	1	k	carmustine	halfpercDMSO	2	A	7	QX97	mean.norm.EXT	-0.256668865511863
580	20140623	RIAILs	1	l	carmustine	halfpercDMSO	2	A	7	QX557	mean.norm.EXT	-0.0171043289212843
581	20140429	RIAILs	1	b	carmustine	halfpercDMSO	2	A	7	QX290	mean.TOF	-1.5467411003583
582	20140512	RIAILs	1	e	carmustine	halfpercDMSO	2	A	7	QX114	mean.TOF	-10.7709613639131
583	20140513	RIAILs	1	f	carmustine	halfpercDMSO	2	A	7	QX76	mean.TOF	-62.0666378247907
584	20140520	RIAILs	1	h	carmustine	halfpercDMSO	2	A	7	QX72	mean.TOF	-22.4583258530664
585	20140526	RIAILs	1	i	carmustine	halfpercDMSO	2	A	7	QX304	mean.TOF	22.9527967970943
586	20140603	RIAILs	1	k	carmustine	halfpercDMSO	2	A	7	QX97	mean.TOF	-63.5761245548412
587	20140623	RIAILs	1	l	carmustine	halfpercDMSO	2	A	7	QX557	mean.TOF	-13.7483537619154
588	20140429	RIAILs	1	b	carmustine	halfpercDMSO	2	A	7	QX290	median.EXT	66.8736881721861
589	20140512	RIAILs	1	e	carmustine	halfpercDMSO	2	A	7	QX114	median.EXT	-67.6875173092485
590	20140513	RIAILs	1	f	carmustine	halfpercDMSO	2	A	7	QX76	median.EXT	-173.269784728526
591	20140520	RIAILs	1	h	carmustine	halfpercDMSO	2	A	7	QX72	median.EXT	-46.1225383116822
592	20140526	RIAILs	1	i	carmustine	halfpercDMSO	2	A	7	QX304	median.EXT	51.0474686955958
593	20140603	RIAILs	1	k	carmustine	halfpercDMSO	2	A	7	QX97	median.EXT	-401.9925462826
594	20140623	RIAILs	1	l	carmustine	halfpercDMSO	2	A	7	QX557	median.EXT	8.52415309022265
595	20140429	RIAILs	1	b	carmustine	halfpercDMSO	2	A	7	QX290	median.norm.EXT	0.146079177890671
596	20140512	RIAILs	1	e	carmustine	halfpercDMSO	2	A	7	QX114	median.norm.EXT	-0.005021981833689
597	20140513	RIAILs	1	f	carmustine	halfpercDMSO	2	A	7	QX76	median.norm.EXT	-0.12129326529843
598	20140520	RIAILs	1	h	carmustine	halfpercDMSO	2	A	7	QX72	median.norm.EXT	0.291206066447924
599	20140526	RIAILs	1	i	carmustine	halfpercDMSO	2	A	7	QX304	median.norm.EXT	0.169954389322425
600	20140603	RIAILs	1	k	carmustine	halfpercDMSO	2	A	7	QX97	median.norm.EXT	-0.393086581885606
601	20140623	RIAILs	1	l	carmustine	halfpercDMSO	2	A	7	QX557	median.norm.EXT	0.0850013498197108
602	20140429	RIAILs	1	b	carmustine	halfpercDMSO	2	A	7	QX290	median.TOF	7.57661951046673
603	20140512	RIAILs	1	e	carmustine	halfpercDMSO	2	A	7	QX114	median.TOF	-10.3522075500397
604	20140513	RIAILs	1	f	carmustine	halfpercDMSO	2	A	7	QX76	median.TOF	-62.3783352520076
605	20140520	RIAILs	1	h	carmustine	halfpercDMSO	2	A	7	QX72	median.TOF	-28.2153128007365
606	20140526	RIAILs	1	i	carmustine	halfpercDMSO	2	A	7	QX304	median.TOF	27.3408840303157
607	20140603	RIAILs	1	k	carmustine	halfpercDMSO	2	A	7	QX97	median.TOF	-114.4545755338
608	20140623	RIAILs	1	l	carmustine	halfpercDMSO	2	A	7	QX557	median.TOF	2.57897433132179
609	20140429	RIAILs	1	b	carmustine	halfpercDMSO	2	A	7	QX290	n	-83.3278402975725
610	20140512	RIAILs	1	e	carmustine	halfpercDMSO	2	A	7	QX114	n	-73.7751609075204
611	20140513	RIAILs	1	f	carmustine	halfpercDMSO	2	A	7	QX76	n	-45.2354275821005
612	20140520	RIAILs	1	h	carmustine	halfpercDMSO	2	A	7	QX72	n	-17.0907510557792
613	20140526	RIAILs	1	i	carmustine	halfpercDMSO	2	A	7	QX304	n	41.4001665654087
614	20140603	RIAILs	1	k	carmustine	halfpercDMSO	2	A	7	QX97	n	-10.855065024619
615	20140623	RIAILs	1	l	carmustine	halfpercDMSO	2	A	7	QX557	n	40.0348673163714
616	20140429	RIAILs	1	b	carmustine	halfpercDMSO	2	A	7	QX290	norm.n	-27.1255660355856
617	20140512	RIAILs	1	e	carmustine	halfpercDMSO	2	A	7	QX114	norm.n	-24.586966100538
618	20140513	RIAILs	1	f	carmustine	halfpercDMSO	2	A	7	QX76	norm.n	-14.4240717501434
619	20140520	RIAILs	1	h	carmustine	halfpercDMSO	2	A	7	QX72	norm.n	-5.29973450851678
620	20140526	RIAILs	1	i	carmustine	halfpercDMSO	2	A	7	QX304	norm.n	14.9641400922158
621	20140603	RIAILs	1	k	carmustine	halfpercDMSO	2	A	7	QX97	norm.n	-3.69684009099447
622	20140623	RIAILs	1	l	carmustine	halfpercDMSO	2	A	7	QX557	norm.n	13.3963365884328
623	20140429	RIAILs	1	b	carmustine	halfpercDMSO	2	A	7	QX290	q10.EXT	8.01657440755062
624	20140512	RIAILs	1	e	carmustine	halfpercDMSO	2	A	7	QX114	q10.EXT	12.1993529673158
625	20140513	RIAILs	1	f	carmustine	halfpercDMSO	2	A	7	QX76	q10.EXT	-15.4742269605259
626	20140520	RIAILs	1	h	carmustine	halfpercDMSO	2	A	7	QX72	q10.EXT	-2.67501447530588
627	20140526	RIAILs	1	i	carmustine	halfpercDMSO	2	A	7	QX304	q10.EXT	9.62849184494559
628	20140603	RIAILs	1	k	carmustine	halfpercDMSO	2	A	7	QX97	q10.EXT	12.7653033729481
629	20140623	RIAILs	1	l	carmustine	halfpercDMSO	2	A	7	QX557	q10.EXT	-22.1658587737399
630	20140429	RIAILs	1	b	carmustine	halfpercDMSO	2	A	7	QX290	q10.norm.EXT	0.070452852789047
631	20140512	RIAILs	1	e	carmustine	halfpercDMSO	2	A	7	QX114	q10.norm.EXT	0.0413805162135687
632	20140513	RIAILs	1	f	carmustine	halfpercDMSO	2	A	7	QX76	q10.norm.EXT	-0.098809381493858
633	20140520	RIAILs	1	h	carmustine	halfpercDMSO	2	A	7	QX72	q10.norm.EXT	0.000167100880378331
634	20140526	RIAILs	1	i	carmustine	halfpercDMSO	2	A	7	QX304	q10.norm.EXT	0.0296268425000209
635	20140603	RIAILs	1	k	carmustine	halfpercDMSO	2	A	7	QX97	q10.norm.EXT	0.0428006354848381
636	20140623	RIAILs	1	l	carmustine	halfpercDMSO	2	A	7	QX557	q10.norm.EXT	-0.132161925514896
637	20140429	RIAILs	1	b	carmustine	halfpercDMSO	2	A	7	QX290	q10.TOF	5.7461286456867
638	20140512	RIAILs	1	e	carmustine	halfpercDMSO	2	A	7	QX114	q10.TOF	-5.3923129431452
639	20140513	RIAILs	1	f	carmustine	halfpercDMSO	2	A	7	QX76	q10.TOF	-8.07160614636213
640	20140520	RIAILs	1	h	carmustine	halfpercDMSO	2	A	7	QX72	q10.TOF	-1.41167309150493
641	20140526	RIAILs	1	i	carmustine	halfpercDMSO	2	A	7	QX304	q10.TOF	6.42820631709533
642	20140603	RIAILs	1	k	carmustine	halfpercDMSO	2	A	7	QX97	q10.TOF	0.0951925931183396
643	20140623	RIAILs	1	l	carmustine	halfpercDMSO	2	A	7	QX557	q10.TOF	-3.4459653369588
644	20140429	RIAILs	1	b	carmustine	halfpercDMSO	2	A	7	QX290	q25.EXT	-1.90895409643583
645	20140512	RIAILs	1	e	carmustine	halfpercDMSO	2	A	7	QX114	q25.EXT	8.961580250455
646	20140513	RIAILs	1	f	carmustine	halfpercDMSO	2	A	7	QX76	q25.EXT	-39.8674168105027
647	20140520	RIAILs	1	h	carmustine	halfpercDMSO	2	A	7	QX72	q25.EXT	-8.24400795877855
648	20140526	RIAILs	1	i	carmustine	halfpercDMSO	2	A	7	QX304	q25.EXT	34.1631214981541
649	20140603	RIAILs	1	k	carmustine	halfpercDMSO	2	A	7	QX97	q25.EXT	-18.5725698487268
650	20140623	RIAILs	1	l	carmustine	halfpercDMSO	2	A	7	QX557	q25.EXT	24.1485839630199
651	20140429	RIAILs	1	b	carmustine	halfpercDMSO	2	A	7	QX290	q25.norm.EXT	-0.0525977388005462
652	20140512	RIAILs	1	e	carmustine	halfpercDMSO	2	A	7	QX114	q25.norm.EXT	0.0227431261713869
653	20140513	RIAILs	1	f	carmustine	halfpercDMSO	2	A	7	QX76	q25.norm.EXT	-0.130883455110295
654	20140520	RIAILs	1	h	carmustine	halfpercDMSO	2	A	7	QX72	q25.norm.EXT	0.0691619283376521
655	20140526	RIAILs	1	i	carmustine	halfpercDMSO	2	A	7	QX304	q25.norm.EXT	0.0913903380308171
656	20140603	RIAILs	1	k	carmustine	halfpercDMSO	2	A	7	QX97	q25.norm.EXT	-0.118901613928737
657	20140623	RIAILs	1	l	carmustine	halfpercDMSO	2	A	7	QX557	q25.norm.EXT	0.0107485477739189
658	20140429	RIAILs	1	b	carmustine	halfpercDMSO	2	A	7	QX290	q25.TOF	9.09847504264086
659	20140512	RIAILs	1	e	carmustine	halfpercDMSO	2	A	7	QX114	q25.TOF	4.13200609551592
660	20140513	RIAILs	1	f	carmustine	halfpercDMSO	2	A	7	QX76	q25.TOF	-8.59253070777871
661	20140520	RIAILs	1	h	carmustine	halfpercDMSO	2	A	7	QX72	q25.TOF	-9.80253960170859
662	20140526	RIAILs	1	i	carmustine	halfpercDMSO	2	A	7	QX304	q25.TOF	10.2697992840684
663	20140603	RIAILs	1	k	carmustine	halfpercDMSO	2	A	7	QX97	q25.TOF	-13.460890608321
664	20140623	RIAILs	1	l	carmustine	halfpercDMSO	2	A	7	QX557	q25.TOF	-3.42790711561492
665	20140429	RIAILs	1	b	carmustine	halfpercDMSO	2	A	7	QX290	q75.EXT	71.5374394700737
666	20140512	RIAILs	1	e	carmustine	halfpercDMSO	2	A	7	QX114	q75.EXT	-336.912087453997
667	20140513	RIAILs	1	f	carmustine	halfpercDMSO	2	A	7	QX76	q75.EXT	-344.478159023174
668	20140520	RIAILs	1	h	carmustine	halfpercDMSO	2	A	7	QX72	q75.EXT	26.6308888350142
669	20140526	RIAILs	1	i	carmustine	halfpercDMSO	2	A	7	QX304	q75.EXT	373.252201154451
670	20140603	RIAILs	1	k	carmustine	halfpercDMSO	2	A	7	QX97	q75.EXT	-727.869584617212
671	20140623	RIAILs	1	l	carmustine	halfpercDMSO	2	A	7	QX557	q75.EXT	-163.915145424804
672	20140429	RIAILs	1	b	carmustine	halfpercDMSO	2	A	7	QX290	q75.norm.EXT	0.0991187355046758
673	20140512	RIAILs	1	e	carmustine	halfpercDMSO	2	A	7	QX114	q75.norm.EXT	-0.0779408602509506
674	20140513	RIAILs	1	f	carmustine	halfpercDMSO	2	A	7	QX76	q75.norm.EXT	-0.371944425201948
675	20140520	RIAILs	1	h	carmustine	halfpercDMSO	2	A	7	QX72	q75.norm.EXT	0.296157284391513
676	20140526	RIAILs	1	i	carmustine	halfpercDMSO	2	A	7	QX304	q75.norm.EXT	0.313723948762585
677	20140603	RIAILs	1	k	carmustine	halfpercDMSO	2	A	7	QX97	q75.norm.EXT	-0.312901210391554
678	20140623	RIAILs	1	l	carmustine	halfpercDMSO	2	A	7	QX557	q75.norm.EXT	-0.00162019259068721
679	20140429	RIAILs	1	b	carmustine	halfpercDMSO	2	A	7	QX290	q75.TOF	8.41337714241273
680	20140512	RIAILs	1	e	carmustine	halfpercDMSO	2	A	7	QX114	q75.TOF	-38.8501559783799
681	20140513	RIAILs	1	f	carmustine	halfpercDMSO	2	A	7	QX76	q75.TOF	-117.334631810971
682	20140520	RIAILs	1	h	carmustine	halfpercDMSO	2	A	7	QX72	q75.TOF	-36.0460840246786
683	20140526	RIAILs	1	i	carmustine	halfpercDMSO	2	A	7	QX304	q75.TOF	73.053400849744
684	20140603	RIAILs	1	k	carmustine	halfpercDMSO	2	A	7	QX97	q75.TOF	-123.728125655687
685	20140623	RIAILs	1	l	carmustine	halfpercDMSO	2	A	7	QX557	q75.TOF	-33.6861047102607
686	20140429	RIAILs	1	b	carmustine	halfpercDMSO	2	A	7	QX290	q90.EXT	-76.6516130373399
687	20140512	RIAILs	1	e	carmustine	halfpercDMSO	2	A	7	QX114	q90.EXT	64.1373956537228
688	20140513	RIAILs	1	f	carmustine	halfpercDMSO	2	A	7	QX76	q90.EXT	-749.551804202402
689	20140520	RIAILs	1	h	carmustine	halfpercDMSO	2	A	7	QX72	q90.EXT	117.204361831061
690	20140526	RIAILs	1	i	carmustine	halfpercDMSO	2	A	7	QX304	q90.EXT	357.077304070463
691	20140603	RIAILs	1	k	carmustine	halfpercDMSO	2	A	7	QX97	q90.EXT	-521.513880501211
692	20140623	RIAILs	1	l	carmustine	halfpercDMSO	2	A	7	QX557	q90.EXT	-160.949879723579
693	20140429	RIAILs	1	b	carmustine	halfpercDMSO	2	A	7	QX290	q90.norm.EXT	-0.000881331652532224
694	20140512	RIAILs	1	e	carmustine	halfpercDMSO	2	A	7	QX114	q90.norm.EXT	0.102897007027782
695	20140513	RIAILs	1	f	carmustine	halfpercDMSO	2	A	7	QX76	q90.norm.EXT	-0.245224399406844
696	20140520	RIAILs	1	h	carmustine	halfpercDMSO	2	A	7	QX72	q90.norm.EXT	0.247823540154837
697	20140526	RIAILs	1	i	carmustine	halfpercDMSO	2	A	7	QX304	q90.norm.EXT	0.25709965306425
698	20140603	RIAILs	1	k	carmustine	halfpercDMSO	2	A	7	QX97	q90.norm.EXT	-0.494064765305087
699	20140623	RIAILs	1	l	carmustine	halfpercDMSO	2	A	7	QX557	q90.norm.EXT	-0.145391286084448
700	20140429	RIAILs	1	b	carmustine	halfpercDMSO	2	A	7	QX290	q90.TOF	-31.2277639973064
701	20140512	RIAILs	1	e	carmustine	halfpercDMSO	2	A	7	QX114	q90.TOF	-9.2074094312443
702	20140513	RIAILs	1	f	carmustine	halfpercDMSO	2	A	7	QX76	q90.TOF	-108.971543768813
703	20140520	RIAILs	1	h	carmustine	halfpercDMSO	2	A	7	QX72	q90.TOF	-12.1551797287923
704	20140526	RIAILs	1	i	carmustine	halfpercDMSO	2	A	7	QX304	q90.TOF	24.4545215219198
705	20140603	RIAILs	1	k	carmustine	halfpercDMSO	2	A	7	QX97	q90.TOF	-97.2721840448248
706	20140623	RIAILs	1	l	carmustine	halfpercDMSO	2	A	7	QX557	q90.TOF	-44.1749223437476
707	20140429	RIAILs	1	b	carmustine	halfpercDMSO	2	A	7	QX290	var.EXT	132927.969513434
708	20140512	RIAILs	1	e	carmustine	halfpercDMSO	2	A	7	QX114	var.EXT	54103.776897306
709	20140513	RIAILs	1	f	carmustine	halfpercDMSO	2	A	7	QX76	var.EXT	-344617.022423981
710	20140520	RIAILs	1	h	carmustine	halfpercDMSO	2	A	7	QX72	var.EXT	-31867.9973985108
711	20140526	RIAILs	1	i	carmustine	halfpercDMSO	2	A	7	QX304	var.EXT	-39871.8437488275
712	20140603	RIAILs	1	k	carmustine	halfpercDMSO	2	A	7	QX97	var.EXT	424248.802779047
713	20140623	RIAILs	1	l	carmustine	halfpercDMSO	2	A	7	QX557	var.EXT	-100184.977199406
714	20140429	RIAILs	1	b	carmustine	halfpercDMSO	2	A	7	QX290	var.TOF	-5050.24105706347
715	20140512	RIAILs	1	e	carmustine	halfpercDMSO	2	A	7	QX114	var.TOF	-1923.47661993329
716	20140513	RIAILs	1	f	carmustine	halfpercDMSO	2	A	7	QX76	var.TOF	-11841.3579883802
717	20140520	RIAILs	1	h	carmustine	halfpercDMSO	2	A	7	QX72	var.TOF	-3300.59018439103
718	20140526	RIAILs	1	i	carmustine	halfpercDMSO	2	A	7	QX304	var.TOF	-3520.92672237919
719	20140603	RIAILs	1	k	carmustine	halfpercDMSO	2	A	7	QX97	var.TOF	5995.92737943979
720	20140623	RIAILs	1	l	carmustine	halfpercDMSO	2	A	7	QX557	var.TOF	-7251.96857626164
721	20140429	RIAILs	1	b	carmustine	halfpercDMSO	2	A	9	QX534	cv.EXT	-0.0440522686445463
722	20140512	RIAILs	1	e	carmustine	halfpercDMSO	2	A	9	QX401	cv.EXT	-0.00396240215593254
723	20140513	RIAILs	1	f	carmustine	halfpercDMSO	2	A	9	QX468	cv.EXT	-0.156031017598475
724	20140520	RIAILs	1	h	carmustine	halfpercDMSO	2	A	9	CB4856	cv.EXT	-0.0860150379017933
725	20140526	RIAILs	1	i	carmustine	halfpercDMSO	2	A	9	QX243	cv.EXT	0.151667908303617
726	20140527	RIAILs	1	j	carmustine	halfpercDMSO	2	A	9	QX417	cv.EXT	0.216542424615395
727	20140603	RIAILs	1	k	carmustine	halfpercDMSO	2	A	9	QX2	cv.EXT	-0.0276018591822512
728	20140623	RIAILs	1	l	carmustine	halfpercDMSO	2	A	9	QX503	cv.EXT	0.0207241893834974
729	20140624	RIAILs	1	m	carmustine	halfpercDMSO	2	A	9	QX451	cv.EXT	-0.163946860499619
730	20140429	RIAILs	1	b	carmustine	halfpercDMSO	2	A	9	QX534	cv.TOF	-0.0292300067815151
731	20140512	RIAILs	1	e	carmustine	halfpercDMSO	2	A	9	QX401	cv.TOF	0.00980074655918027
732	20140513	RIAILs	1	f	carmustine	halfpercDMSO	2	A	9	QX468	cv.TOF	-0.0854049486306266
733	20140520	RIAILs	1	h	carmustine	halfpercDMSO	2	A	9	CB4856	cv.TOF	-0.0515185559978387
734	20140526	RIAILs	1	i	carmustine	halfpercDMSO	2	A	9	QX243	cv.TOF	-0.00317326083112945
735	20140527	RIAILs	1	j	carmustine	halfpercDMSO	2	A	9	QX417	cv.TOF	0.0917371194680973
736	20140603	RIAILs	1	k	carmustine	halfpercDMSO	2	A	9	QX2	cv.TOF	-0.034451125527814
737	20140623	RIAILs	1	l	carmustine	halfpercDMSO	2	A	9	QX503	cv.TOF	0.0276392661923759
738	20140624	RIAILs	1	m	carmustine	halfpercDMSO	2	A	9	QX451	cv.TOF	-0.0759623805039228
739	20140429	RIAILs	1	b	carmustine	halfpercDMSO	2	A	9	QX534	mean.EXT	-91.7704554812091
740	20140512	RIAILs	1	e	carmustine	halfpercDMSO	2	A	9	QX401	mean.EXT	75.7831410077687
741	20140513	RIAILs	1	f	carmustine	halfpercDMSO	2	A	9	QX468	mean.EXT	45.7638398675532
742	20140520	RIAILs	1	h	carmustine	halfpercDMSO	2	A	9	CB4856	mean.EXT	-6.53332496839358
743	20140526	RIAILs	1	i	carmustine	halfpercDMSO	2	A	9	QX243	mean.EXT	-21.0517066056911
744	20140527	RIAILs	1	j	carmustine	halfpercDMSO	2	A	9	QX417	mean.EXT	-150.861680231747
745	20140603	RIAILs	1	k	carmustine	halfpercDMSO	2	A	9	QX2	mean.EXT	4.98437438179292
746	20140623	RIAILs	1	l	carmustine	halfpercDMSO	2	A	9	QX503	mean.EXT	26.1368786211436
747	20140624	RIAILs	1	m	carmustine	halfpercDMSO	2	A	9	QX451	mean.EXT	77.563848363578
748	20140429	RIAILs	1	b	carmustine	halfpercDMSO	2	A	9	QX534	mean.norm.EXT	-0.129611443129722
749	20140512	RIAILs	1	e	carmustine	halfpercDMSO	2	A	9	QX401	mean.norm.EXT	0.108557214691229
750	20140513	RIAILs	1	f	carmustine	halfpercDMSO	2	A	9	QX468	mean.norm.EXT	0.0978395482455922
751	20140520	RIAILs	1	h	carmustine	halfpercDMSO	2	A	9	CB4856	mean.norm.EXT	0.0185813397540279
752	20140526	RIAILs	1	i	carmustine	halfpercDMSO	2	A	9	QX243	mean.norm.EXT	0.0342000107002374
753	20140527	RIAILs	1	j	carmustine	halfpercDMSO	2	A	9	QX417	mean.norm.EXT	-0.0576713978387962
754	20140603	RIAILs	1	k	carmustine	halfpercDMSO	2	A	9	QX2	mean.norm.EXT	0.0956631902942256
755	20140623	RIAILs	1	l	carmustine	halfpercDMSO	2	A	9	QX503	mean.norm.EXT	0.124068182969798
756	20140624	RIAILs	1	m	carmustine	halfpercDMSO	2	A	9	QX451	mean.norm.EXT	0.254587651006461
757	20140429	RIAILs	1	b	carmustine	halfpercDMSO	2	A	9	QX534	mean.TOF	-18.1864754788351
758	20140512	RIAILs	1	e	carmustine	halfpercDMSO	2	A	9	QX401	mean.TOF	12.2666161345544
759	20140513	RIAILs	1	f	carmustine	halfpercDMSO	2	A	9	QX468	mean.TOF	17.6822135357761
760	20140520	RIAILs	1	h	carmustine	halfpercDMSO	2	A	9	CB4856	mean.TOF	-1.46572890179997
761	20140526	RIAILs	1	i	carmustine	halfpercDMSO	2	A	9	QX243	mean.TOF	-17.1001853526748
762	20140527	RIAILs	1	j	carmustine	halfpercDMSO	2	A	9	QX417	mean.TOF	-56.0572361040703
763	20140603	RIAILs	1	k	carmustine	halfpercDMSO	2	A	9	QX2	mean.TOF	-6.40514646090928
764	20140623	RIAILs	1	l	carmustine	halfpercDMSO	2	A	9	QX503	mean.TOF	-8.47311672647395
765	20140624	RIAILs	1	m	carmustine	halfpercDMSO	2	A	9	QX451	mean.TOF	15.9703669240137
766	20140429	RIAILs	1	b	carmustine	halfpercDMSO	2	A	9	QX534	median.EXT	-72.4439413473542
767	20140512	RIAILs	1	e	carmustine	halfpercDMSO	2	A	9	QX401	median.EXT	30.1475723857623
768	20140513	RIAILs	1	f	carmustine	halfpercDMSO	2	A	9	QX468	median.EXT	141.1139040362
769	20140520	RIAILs	1	h	carmustine	halfpercDMSO	2	A	9	CB4856	median.EXT	-23.4642194280241
770	20140526	RIAILs	1	i	carmustine	halfpercDMSO	2	A	9	QX243	median.EXT	-22.6232065705378
771	20140527	RIAILs	1	j	carmustine	halfpercDMSO	2	A	9	QX417	median.EXT	-104.760094740931
772	20140603	RIAILs	1	k	carmustine	halfpercDMSO	2	A	9	QX2	median.EXT	103.263136032525
773	20140623	RIAILs	1	l	carmustine	halfpercDMSO	2	A	9	QX503	median.EXT	-73.048993452406
774	20140624	RIAILs	1	m	carmustine	halfpercDMSO	2	A	9	QX451	median.EXT	102.27388833078
775	20140429	RIAILs	1	b	carmustine	halfpercDMSO	2	A	9	QX534	median.norm.EXT	-0.149364141253072
776	20140512	RIAILs	1	e	carmustine	halfpercDMSO	2	A	9	QX401	median.norm.EXT	0.0659060991380632
777	20140513	RIAILs	1	f	carmustine	halfpercDMSO	2	A	9	QX468	median.norm.EXT	0.189305438472273
778	20140520	RIAILs	1	h	carmustine	halfpercDMSO	2	A	9	CB4856	median.norm.EXT	-0.0584127653146093
779	20140526	RIAILs	1	i	carmustine	halfpercDMSO	2	A	9	QX243	median.norm.EXT	-0.0267530511919293
780	20140527	RIAILs	1	j	carmustine	halfpercDMSO	2	A	9	QX417	median.norm.EXT	0.0265642687928353
781	20140603	RIAILs	1	k	carmustine	halfpercDMSO	2	A	9	QX2	median.norm.EXT	0.05225799913054
782	20140623	RIAILs	1	l	carmustine	halfpercDMSO	2	A	9	QX503	median.norm.EXT	0.178954473422554
783	20140624	RIAILs	1	m	carmustine	halfpercDMSO	2	A	9	QX451	median.norm.EXT	0.285484539674916
784	20140429	RIAILs	1	b	carmustine	halfpercDMSO	2	A	9	QX534	median.TOF	-11.1322831598281
785	20140512	RIAILs	1	e	carmustine	halfpercDMSO	2	A	9	QX401	median.TOF	4.0916705275735
786	20140513	RIAILs	1	f	carmustine	halfpercDMSO	2	A	9	QX468	median.TOF	40.0655428256056
787	20140520	RIAILs	1	h	carmustine	halfpercDMSO	2	A	9	CB4856	median.TOF	0.00856099988848574
788	20140526	RIAILs	1	i	carmustine	halfpercDMSO	2	A	9	QX243	median.TOF	-1.03689137135757
789	20140527	RIAILs	1	j	carmustine	halfpercDMSO	2	A	9	QX417	median.TOF	-55.6163545573615
790	20140603	RIAILs	1	k	carmustine	halfpercDMSO	2	A	9	QX2	median.TOF	21.0931934523906
791	20140623	RIAILs	1	l	carmustine	halfpercDMSO	2	A	9	QX503	median.TOF	-17.3476909096822
792	20140624	RIAILs	1	m	carmustine	halfpercDMSO	2	A	9	QX451	median.TOF	28.8360217160339
793	20140429	RIAILs	1	b	carmustine	halfpercDMSO	2	A	9	QX534	n	31.215898147065
794	20140512	RIAILs	1	e	carmustine	halfpercDMSO	2	A	9	QX401	n	3.64368548486175
795	20140513	RIAILs	1	f	carmustine	halfpercDMSO	2	A	9	QX468	n	82.1886727556662
796	20140520	RIAILs	1	h	carmustine	halfpercDMSO	2	A	9	CB4856	n	68.0042314697579
797	20140526	RIAILs	1	i	carmustine	halfpercDMSO	2	A	9	QX243	n	60.0388875355826
798	20140527	RIAILs	1	j	carmustine	halfpercDMSO	2	A	9	QX417	n	-25.2580298178838
799	20140603	RIAILs	1	k	carmustine	halfpercDMSO	2	A	9	QX2	n	-11.0801935477952
800	20140623	RIAILs	1	l	carmustine	halfpercDMSO	2	A	9	QX503	n	-16.126689335238
801	20140624	RIAILs	1	m	carmustine	halfpercDMSO	2	A	9	QX451	n	23.0361451973021
802	20140429	RIAILs	1	b	carmustine	halfpercDMSO	2	A	9	QX534	norm.n	10.9304951830706
803	20140512	RIAILs	1	e	carmustine	halfpercDMSO	2	A	9	QX401	norm.n	1.20562392858587
804	20140513	RIAILs	1	f	carmustine	halfpercDMSO	2	A	9	QX468	norm.n	28.1784213113673
805	20140520	RIAILs	1	h	carmustine	halfpercDMSO	2	A	9	CB4856	norm.n	23.0170113083958
806	20140526	RIAILs	1	i	carmustine	halfpercDMSO	2	A	9	QX243	norm.n	-4.43409233311582
807	20140527	RIAILs	1	j	carmustine	halfpercDMSO	2	A	9	QX417	norm.n	-8.74549333209746
808	20140603	RIAILs	1	k	carmustine	halfpercDMSO	2	A	9	QX2	norm.n	-3.75362679649294
809	20140623	RIAILs	1	l	carmustine	halfpercDMSO	2	A	9	QX503	norm.n	-5.33135434869282
810	20140624	RIAILs	1	m	carmustine	halfpercDMSO	2	A	9	QX451	norm.n	6.83803277739531
811	20140429	RIAILs	1	b	carmustine	halfpercDMSO	2	A	9	QX534	q10.EXT	-3.17169640103178
812	20140512	RIAILs	1	e	carmustine	halfpercDMSO	2	A	9	QX401	q10.EXT	-5.88320418203356
813	20140513	RIAILs	1	f	carmustine	halfpercDMSO	2	A	9	QX468	q10.EXT	10.5046303076274
814	20140520	RIAILs	1	h	carmustine	halfpercDMSO	2	A	9	CB4856	q10.EXT	-17.5898398020169
815	20140526	RIAILs	1	i	carmustine	halfpercDMSO	2	A	9	QX243	q10.EXT	-1.66627310717524
816	20140527	RIAILs	1	j	carmustine	halfpercDMSO	2	A	9	QX417	q10.EXT	-3.74667956095753
817	20140603	RIAILs	1	k	carmustine	halfpercDMSO	2	A	9	QX2	q10.EXT	0.766864341558512
818	20140623	RIAILs	1	l	carmustine	halfpercDMSO	2	A	9	QX503	q10.EXT	-20.3248066037786
819	20140624	RIAILs	1	m	carmustine	halfpercDMSO	2	A	9	QX451	q10.EXT	20.2125997449825
820	20140429	RIAILs	1	b	carmustine	halfpercDMSO	2	A	9	QX534	q10.norm.EXT	-0.101348597504891
821	20140512	RIAILs	1	e	carmustine	halfpercDMSO	2	A	9	QX401	q10.norm.EXT	-0.0372428953077941
822	20140513	RIAILs	1	f	carmustine	halfpercDMSO	2	A	9	QX468	q10.norm.EXT	0.0851698548445643
823	20140520	RIAILs	1	h	carmustine	halfpercDMSO	2	A	9	CB4856	q10.norm.EXT	-0.0665043722354482
824	20140526	RIAILs	1	i	carmustine	halfpercDMSO	2	A	9	QX243	q10.norm.EXT	0.0958598558399644
825	20140527	RIAILs	1	j	carmustine	halfpercDMSO	2	A	9	QX417	q10.norm.EXT	0.0137056276584535
826	20140603	RIAILs	1	k	carmustine	halfpercDMSO	2	A	9	QX2	q10.norm.EXT	-0.0427139266489004
827	20140623	RIAILs	1	l	carmustine	halfpercDMSO	2	A	9	QX503	q10.norm.EXT	-0.0572186260555453
828	20140624	RIAILs	1	m	carmustine	halfpercDMSO	2	A	9	QX451	q10.norm.EXT	0.148516116808095
829	20140429	RIAILs	1	b	carmustine	halfpercDMSO	2	A	9	QX534	q10.TOF	-1.29021213476992
830	20140512	RIAILs	1	e	carmustine	halfpercDMSO	2	A	9	QX401	q10.TOF	0.642240872143537
831	20140513	RIAILs	1	f	carmustine	halfpercDMSO	2	A	9	QX468	q10.TOF	0.9130924723929
832	20140520	RIAILs	1	h	carmustine	halfpercDMSO	2	A	9	CB4856	q10.TOF	-2.7820266653428
833	20140526	RIAILs	1	i	carmustine	halfpercDMSO	2	A	9	QX243	q10.TOF	-5.35894599622299
834	20140527	RIAILs	1	j	carmustine	halfpercDMSO	2	A	9	QX417	q10.TOF	-4.02046863399698
835	20140603	RIAILs	1	k	carmustine	halfpercDMSO	2	A	9	QX2	q10.TOF	1.52059835954908
836	20140623	RIAILs	1	l	carmustine	halfpercDMSO	2	A	9	QX503	q10.TOF	-7.68421879007123
837	20140624	RIAILs	1	m	carmustine	halfpercDMSO	2	A	9	QX451	q10.TOF	5.36825460835386
838	20140429	RIAILs	1	b	carmustine	halfpercDMSO	2	A	9	QX534	q25.EXT	-22.0815348978345
839	20140512	RIAILs	1	e	carmustine	halfpercDMSO	2	A	9	QX401	q25.EXT	2.96852128205373
840	20140513	RIAILs	1	f	carmustine	halfpercDMSO	2	A	9	QX468	q25.EXT	72.6603473158922
841	20140520	RIAILs	1	h	carmustine	halfpercDMSO	2	A	9	CB4856	q25.EXT	16.747315751723
842	20140526	RIAILs	1	i	carmustine	halfpercDMSO	2	A	9	QX243	q25.EXT	-11.6159774420098
843	20140527	RIAILs	1	j	carmustine	halfpercDMSO	2	A	9	QX417	q25.EXT	-2.60365456115902
844	20140603	RIAILs	1	k	carmustine	halfpercDMSO	2	A	9	QX2	q25.EXT	-1.04160216928631
845	20140623	RIAILs	1	l	carmustine	halfpercDMSO	2	A	9	QX503	q25.EXT	-9.57872420290736
846	20140624	RIAILs	1	m	carmustine	halfpercDMSO	2	A	9	QX451	q25.EXT	61.4855045613302
847	20140429	RIAILs	1	b	carmustine	halfpercDMSO	2	A	9	QX534	q25.norm.EXT	-0.111928722443387
848	20140512	RIAILs	1	e	carmustine	halfpercDMSO	2	A	9	QX401	q25.norm.EXT	-0.00465302666231809
849	20140513	RIAILs	1	f	carmustine	halfpercDMSO	2	A	9	QX468	q25.norm.EXT	0.163108139416579
850	20140520	RIAILs	1	h	carmustine	halfpercDMSO	2	A	9	CB4856	q25.norm.EXT	0.0304429910737721
851	20140526	RIAILs	1	i	carmustine	halfpercDMSO	2	A	9	QX243	q25.norm.EXT	0.0915717013010384
852	20140527	RIAILs	1	j	carmustine	halfpercDMSO	2	A	9	QX417	q25.norm.EXT	-0.0165191999991656
853	20140603	RIAILs	1	k	carmustine	halfpercDMSO	2	A	9	QX2	q25.norm.EXT	-0.0708616412198965
854	20140623	RIAILs	1	l	carmustine	halfpercDMSO	2	A	9	QX503	q25.norm.EXT	-0.035234289777347
855	20140624	RIAILs	1	m	carmustine	halfpercDMSO	2	A	9	QX451	q25.norm.EXT	0.274432545564479
856	20140429	RIAILs	1	b	carmustine	halfpercDMSO	2	A	9	QX534	q25.TOF	-10.1895140684559
857	20140512	RIAILs	1	e	carmustine	halfpercDMSO	2	A	9	QX401	q25.TOF	3.57553654886298
858	20140513	RIAILs	1	f	carmustine	halfpercDMSO	2	A	9	QX468	q25.TOF	18.2632176766767
859	20140520	RIAILs	1	h	carmustine	halfpercDMSO	2	A	9	CB4856	q25.TOF	4.74828159607076
860	20140526	RIAILs	1	i	carmustine	halfpercDMSO	2	A	9	QX243	q25.TOF	-6.52588768482962
861	20140527	RIAILs	1	j	carmustine	halfpercDMSO	2	A	9	QX417	q25.TOF	-12.2813864551071
862	20140603	RIAILs	1	k	carmustine	halfpercDMSO	2	A	9	QX2	q25.TOF	6.41847244057189
863	20140623	RIAILs	1	l	carmustine	halfpercDMSO	2	A	9	QX503	q25.TOF	-7.73437666226786
864	20140624	RIAILs	1	m	carmustine	halfpercDMSO	2	A	9	QX451	q25.TOF	5.85108373480429
865	20140429	RIAILs	1	b	carmustine	halfpercDMSO	2	A	9	QX534	q75.EXT	-137.315428411461
866	20140512	RIAILs	1	e	carmustine	halfpercDMSO	2	A	9	QX401	q75.EXT	151.648570139532
867	20140513	RIAILs	1	f	carmustine	halfpercDMSO	2	A	9	QX468	q75.EXT	226.265668134223
868	20140520	RIAILs	1	h	carmustine	halfpercDMSO	2	A	9	CB4856	q75.EXT	105.058416849082
869	20140526	RIAILs	1	i	carmustine	halfpercDMSO	2	A	9	QX243	q75.EXT	-161.263395262952
870	20140527	RIAILs	1	j	carmustine	halfpercDMSO	2	A	9	QX417	q75.EXT	-394.629903280076
871	20140603	RIAILs	1	k	carmustine	halfpercDMSO	2	A	9	QX2	q75.EXT	-192.194910240225
872	20140623	RIAILs	1	l	carmustine	halfpercDMSO	2	A	9	QX503	q75.EXT	163.007472254304
873	20140624	RIAILs	1	m	carmustine	halfpercDMSO	2	A	9	QX451	q75.EXT	105.057870493375
874	20140429	RIAILs	1	b	carmustine	halfpercDMSO	2	A	9	QX534	q75.norm.EXT	-0.0413727521669345
875	20140512	RIAILs	1	e	carmustine	halfpercDMSO	2	A	9	QX401	q75.norm.EXT	0.212901764905712
876	20140513	RIAILs	1	f	carmustine	halfpercDMSO	2	A	9	QX468	q75.norm.EXT	0.0460150456474211
877	20140520	RIAILs	1	h	carmustine	halfpercDMSO	2	A	9	CB4856	q75.norm.EXT	0.117681511796315
878	20140526	RIAILs	1	i	carmustine	halfpercDMSO	2	A	9	QX243	q75.norm.EXT	-0.0226049188795361
879	20140527	RIAILs	1	j	carmustine	halfpercDMSO	2	A	9	QX417	q75.norm.EXT	-0.109961391490931
880	20140603	RIAILs	1	k	carmustine	halfpercDMSO	2	A	9	QX2	q75.norm.EXT	0.0747892917775732
881	20140623	RIAILs	1	l	carmustine	halfpercDMSO	2	A	9	QX503	q75.norm.EXT	0.112181597955393
882	20140624	RIAILs	1	m	carmustine	halfpercDMSO	2	A	9	QX451	q75.norm.EXT	0.220824049404398
883	20140429	RIAILs	1	b	carmustine	halfpercDMSO	2	A	9	QX534	q75.TOF	-29.714141153768
884	20140512	RIAILs	1	e	carmustine	halfpercDMSO	2	A	9	QX401	q75.TOF	7.49888378276542
885	20140513	RIAILs	1	f	carmustine	halfpercDMSO	2	A	9	QX468	q75.TOF	40.5233163777206
886	20140520	RIAILs	1	h	carmustine	halfpercDMSO	2	A	9	CB4856	q75.TOF	6.84679167993671
887	20140526	RIAILs	1	i	carmustine	halfpercDMSO	2	A	9	QX243	q75.TOF	-25.4291353922943
888	20140527	RIAILs	1	j	carmustine	halfpercDMSO	2	A	9	QX417	q75.TOF	-121.728208500334
889	20140603	RIAILs	1	k	carmustine	halfpercDMSO	2	A	9	QX2	q75.TOF	-36.1058793499556
890	20140623	RIAILs	1	l	carmustine	halfpercDMSO	2	A	9	QX503	q75.TOF	1.63632746728846
891	20140624	RIAILs	1	m	carmustine	halfpercDMSO	2	A	9	QX451	q75.TOF	29.3655653248845
892	20140429	RIAILs	1	b	carmustine	halfpercDMSO	2	A	9	QX534	q90.EXT	-56.3586661616781
893	20140512	RIAILs	1	e	carmustine	halfpercDMSO	2	A	9	QX401	q90.EXT	235.379138010444
894	20140513	RIAILs	1	f	carmustine	halfpercDMSO	2	A	9	QX468	q90.EXT	-153.459119365952
895	20140520	RIAILs	1	h	carmustine	halfpercDMSO	2	A	9	CB4856	q90.EXT	52.9088805026622
896	20140526	RIAILs	1	i	carmustine	halfpercDMSO	2	A	9	QX243	q90.EXT	-220.220324256599
897	20140527	RIAILs	1	j	carmustine	halfpercDMSO	2	A	9	QX417	q90.EXT	-268.447397289374
898	20140603	RIAILs	1	k	carmustine	halfpercDMSO	2	A	9	QX2	q90.EXT	-18.1312325903883
899	20140623	RIAILs	1	l	carmustine	halfpercDMSO	2	A	9	QX503	q90.EXT	53.7292341520853
900	20140624	RIAILs	1	m	carmustine	halfpercDMSO	2	A	9	QX451	q90.EXT	120.787015580978
901	20140429	RIAILs	1	b	carmustine	halfpercDMSO	2	A	9	QX534	q90.norm.EXT	-0.0438461750600105
902	20140512	RIAILs	1	e	carmustine	halfpercDMSO	2	A	9	QX401	q90.norm.EXT	0.203063552473775
903	20140513	RIAILs	1	f	carmustine	halfpercDMSO	2	A	9	QX468	q90.norm.EXT	-0.105732887380381
904	20140520	RIAILs	1	h	carmustine	halfpercDMSO	2	A	9	CB4856	q90.norm.EXT	-0.00254974062408996
905	20140526	RIAILs	1	i	carmustine	halfpercDMSO	2	A	9	QX243	q90.norm.EXT	-0.0429523000073525
906	20140527	RIAILs	1	j	carmustine	halfpercDMSO	2	A	9	QX417	q90.norm.EXT	-0.138421976028811
907	20140603	RIAILs	1	k	carmustine	halfpercDMSO	2	A	9	QX2	q90.norm.EXT	0.373145709759104
908	20140623	RIAILs	1	l	carmustine	halfpercDMSO	2	A	9	QX503	q90.norm.EXT	0.372831870779961
909	20140624	RIAILs	1	m	carmustine	halfpercDMSO	2	A	9	QX451	q90.norm.EXT	0.262849462211379
910	20140429	RIAILs	1	b	carmustine	halfpercDMSO	2	A	9	QX534	q90.TOF	8.34178816738385
911	20140512	RIAILs	1	e	carmustine	halfpercDMSO	2	A	9	QX401	q90.TOF	36.069821198261
912	20140513	RIAILs	1	f	carmustine	halfpercDMSO	2	A	9	QX468	q90.TOF	-29.7557565063095
913	20140520	RIAILs	1	h	carmustine	halfpercDMSO	2	A	9	CB4856	q90.TOF	-6.09329820468692
914	20140526	RIAILs	1	i	carmustine	halfpercDMSO	2	A	9	QX243	q90.TOF	-103.668083539661
915	20140527	RIAILs	1	j	carmustine	halfpercDMSO	2	A	9	QX417	q90.TOF	-89.0851606272467
916	20140603	RIAILs	1	k	carmustine	halfpercDMSO	2	A	9	QX2	q90.TOF	-41.7183330760655
917	20140623	RIAILs	1	l	carmustine	halfpercDMSO	2	A	9	QX503	q90.TOF	1.12531238327204
918	20140624	RIAILs	1	m	carmustine	halfpercDMSO	2	A	9	QX451	q90.TOF	-2.84819044701921
919	20140429	RIAILs	1	b	carmustine	halfpercDMSO	2	A	9	QX534	var.EXT	-200724.567647594
920	20140512	RIAILs	1	e	carmustine	halfpercDMSO	2	A	9	QX401	var.EXT	75936.2332403156
921	20140513	RIAILs	1	f	carmustine	halfpercDMSO	2	A	9	QX468	var.EXT	-158966.041076422
922	20140520	RIAILs	1	h	carmustine	halfpercDMSO	2	A	9	CB4856	var.EXT	-111545.2977828
923	20140526	RIAILs	1	i	carmustine	halfpercDMSO	2	A	9	QX243	var.EXT	102083.320545378
924	20140527	RIAILs	1	j	carmustine	halfpercDMSO	2	A	9	QX417	var.EXT	-79902.2834150087
925	20140603	RIAILs	1	k	carmustine	halfpercDMSO	2	A	9	QX2	var.EXT	-24595.8208807282
926	20140623	RIAILs	1	l	carmustine	halfpercDMSO	2	A	9	QX503	var.EXT	73777.5728652574
927	20140624	RIAILs	1	m	carmustine	halfpercDMSO	2	A	9	QX451	var.EXT	-26656.6509214053
928	20140429	RIAILs	1	b	carmustine	halfpercDMSO	2	A	9	QX534	var.TOF	-8465.68400577406
929	20140512	RIAILs	1	e	carmustine	halfpercDMSO	2	A	9	QX401	var.TOF	2429.83735015089
930	20140513	RIAILs	1	f	carmustine	halfpercDMSO	2	A	9	QX468	var.TOF	-3959.92237455608
931	20140520	RIAILs	1	h	carmustine	halfpercDMSO	2	A	9	CB4856	var.TOF	-4495.13302184624
932	20140526	RIAILs	1	i	carmustine	halfpercDMSO	2	A	9	QX243	var.TOF	-6457.70972475846
933	20140527	RIAILs	1	j	carmustine	halfpercDMSO	2	A	9	QX417	var.TOF	-8842.08866244166
934	20140603	RIAILs	1	k	carmustine	halfpercDMSO	2	A	9	QX2	var.TOF	-6288.08688254427
935	20140623	RIAILs	1	l	carmustine	halfpercDMSO	2	A	9	QX503	var.TOF	947.81408957774
936	20140624	RIAILs	1	m	carmustine	halfpercDMSO	2	A	9	QX451	var.TOF	-2860.76703413683
937	20140429	RIAILs	1	b	carmustine	halfpercDMSO	2	A	11	QX307	cv.EXT	-0.0383599112341673
938	20140512	RIAILs	1	e	carmustine	halfpercDMSO	2	A	11	QX453	cv.EXT	0.00679577742282843
939	20140513	RIAILs	1	f	carmustine	halfpercDMSO	2	A	11	QX416	cv.EXT	-0.0136402681803372
940	20140520	RIAILs	1	h	carmustine	halfpercDMSO	2	A	11	QX561	cv.EXT	-0.0524341108096269
941	20140527	RIAILs	1	j	carmustine	halfpercDMSO	2	A	11	QX475	cv.EXT	0.178916790089403
942	20140603	RIAILs	1	k	carmustine	halfpercDMSO	2	A	11	QX77	cv.EXT	-0.10280185467468
943	20140623	RIAILs	1	l	carmustine	halfpercDMSO	2	A	11	QX437	cv.EXT	-0.138256509457676
944	20140429	RIAILs	1	b	carmustine	halfpercDMSO	2	A	11	QX307	cv.TOF	-0.0547062141437261
945	20140512	RIAILs	1	e	carmustine	halfpercDMSO	2	A	11	QX453	cv.TOF	0.0536317552734272
946	20140513	RIAILs	1	f	carmustine	halfpercDMSO	2	A	11	QX416	cv.TOF	-0.0243048244171963
947	20140520	RIAILs	1	h	carmustine	halfpercDMSO	2	A	11	QX561	cv.TOF	-0.0318832853014269
948	20140527	RIAILs	1	j	carmustine	halfpercDMSO	2	A	11	QX475	cv.TOF	0.100946352120589
949	20140603	RIAILs	1	k	carmustine	halfpercDMSO	2	A	11	QX77	cv.TOF	-0.129135357989828
950	20140623	RIAILs	1	l	carmustine	halfpercDMSO	2	A	11	QX437	cv.TOF	-0.117061375748964
951	20140429	RIAILs	1	b	carmustine	halfpercDMSO	2	A	11	QX307	mean.EXT	87.7279301028278
952	20140512	RIAILs	1	e	carmustine	halfpercDMSO	2	A	11	QX453	mean.EXT	115.41790183706
953	20140513	RIAILs	1	f	carmustine	halfpercDMSO	2	A	11	QX416	mean.EXT	29.942252427746
954	20140520	RIAILs	1	h	carmustine	halfpercDMSO	2	A	11	QX561	mean.EXT	-32.5006737059095
955	20140527	RIAILs	1	j	carmustine	halfpercDMSO	2	A	11	QX475	mean.EXT	-168.721279585915
956	20140603	RIAILs	1	k	carmustine	halfpercDMSO	2	A	11	QX77	mean.EXT	-147.335578984754
957	20140623	RIAILs	1	l	carmustine	halfpercDMSO	2	A	11	QX437	mean.EXT	-98.000436824771
958	20140429	RIAILs	1	b	carmustine	halfpercDMSO	2	A	11	QX307	mean.norm.EXT	0.135978523329188
959	20140512	RIAILs	1	e	carmustine	halfpercDMSO	2	A	11	QX453	mean.norm.EXT	0.235132186043138
960	20140513	RIAILs	1	f	carmustine	halfpercDMSO	2	A	11	QX416	mean.norm.EXT	0.165085782260983
961	20140520	RIAILs	1	h	carmustine	halfpercDMSO	2	A	11	QX561	mean.norm.EXT	0.0082288469727897
962	20140527	RIAILs	1	j	carmustine	halfpercDMSO	2	A	11	QX475	mean.norm.EXT	0.0544733619365224
963	20140603	RIAILs	1	k	carmustine	halfpercDMSO	2	A	11	QX77	mean.norm.EXT	-0.17711078684825
964	20140623	RIAILs	1	l	carmustine	halfpercDMSO	2	A	11	QX437	mean.norm.EXT	0.0429400627651385
965	20140429	RIAILs	1	b	carmustine	halfpercDMSO	2	A	11	QX307	mean.TOF	23.4257498416815
966	20140512	RIAILs	1	e	carmustine	halfpercDMSO	2	A	11	QX453	mean.TOF	14.9459510215934
967	20140513	RIAILs	1	f	carmustine	halfpercDMSO	2	A	11	QX416	mean.TOF	0.418957967389611
968	20140520	RIAILs	1	h	carmustine	halfpercDMSO	2	A	11	QX561	mean.TOF	-5.71553008587586
969	20140527	RIAILs	1	j	carmustine	halfpercDMSO	2	A	11	QX475	mean.TOF	-61.760406645411
970	20140603	RIAILs	1	k	carmustine	halfpercDMSO	2	A	11	QX77	mean.TOF	-19.2489486234795
971	20140623	RIAILs	1	l	carmustine	halfpercDMSO	2	A	11	QX437	mean.TOF	-25.2613882509596
972	20140429	RIAILs	1	b	carmustine	halfpercDMSO	2	A	11	QX307	median.EXT	121.483077402054
973	20140512	RIAILs	1	e	carmustine	halfpercDMSO	2	A	11	QX453	median.EXT	12.2329100188291
974	20140513	RIAILs	1	f	carmustine	halfpercDMSO	2	A	11	QX416	median.EXT	51.0346619483519
975	20140520	RIAILs	1	h	carmustine	halfpercDMSO	2	A	11	QX561	median.EXT	0.828366742490635
976	20140527	RIAILs	1	j	carmustine	halfpercDMSO	2	A	11	QX475	median.EXT	-124.308528518609
977	20140603	RIAILs	1	k	carmustine	halfpercDMSO	2	A	11	QX77	median.EXT	69.6542426787691
978	20140623	RIAILs	1	l	carmustine	halfpercDMSO	2	A	11	QX437	median.EXT	-30.3537707133589
979	20140429	RIAILs	1	b	carmustine	halfpercDMSO	2	A	11	QX307	median.norm.EXT	0.108087468043459
980	20140512	RIAILs	1	e	carmustine	halfpercDMSO	2	A	11	QX453	median.norm.EXT	0.378146351482857
981	20140513	RIAILs	1	f	carmustine	halfpercDMSO	2	A	11	QX416	median.norm.EXT	0.248463173935925
982	20140520	RIAILs	1	h	carmustine	halfpercDMSO	2	A	11	QX561	median.norm.EXT	0.123129954973935
983	20140527	RIAILs	1	j	carmustine	halfpercDMSO	2	A	11	QX475	median.norm.EXT	0.155197792957747
984	20140603	RIAILs	1	k	carmustine	halfpercDMSO	2	A	11	QX77	median.norm.EXT	-0.269733606960545
985	20140623	RIAILs	1	l	carmustine	halfpercDMSO	2	A	11	QX437	median.norm.EXT	0.25145613584281
986	20140429	RIAILs	1	b	carmustine	halfpercDMSO	2	A	11	QX307	median.TOF	38.7527243249008
987	20140512	RIAILs	1	e	carmustine	halfpercDMSO	2	A	11	QX453	median.TOF	7.07944806774083
988	20140513	RIAILs	1	f	carmustine	halfpercDMSO	2	A	11	QX416	median.TOF	1.07165405552196
989	20140520	RIAILs	1	h	carmustine	halfpercDMSO	2	A	11	QX561	median.TOF	9.02078345972116
990	20140527	RIAILs	1	j	carmustine	halfpercDMSO	2	A	11	QX475	median.TOF	-69.066343864891
991	20140603	RIAILs	1	k	carmustine	halfpercDMSO	2	A	11	QX77	median.TOF	43.3632084218493
992	20140623	RIAILs	1	l	carmustine	halfpercDMSO	2	A	11	QX437	median.TOF	-18.2743561506861
993	20140429	RIAILs	1	b	carmustine	halfpercDMSO	2	A	11	QX307	n	41.8598730626229
994	20140512	RIAILs	1	e	carmustine	halfpercDMSO	2	A	11	QX453	n	-51.5141183486158
995	20140513	RIAILs	1	f	carmustine	halfpercDMSO	2	A	11	QX416	n	-34.2623348543126
996	20140520	RIAILs	1	h	carmustine	halfpercDMSO	2	A	11	QX561	n	28.2615212105306
997	20140527	RIAILs	1	j	carmustine	halfpercDMSO	2	A	11	QX475	n	-85.9977378226056
998	20140603	RIAILs	1	k	carmustine	halfpercDMSO	2	A	11	QX77	n	-32.1736749460796
999	20140623	RIAILs	1	l	carmustine	halfpercDMSO	2	A	11	QX437	n	23.6152703603628
1000	20140429	RIAILs	1	b	carmustine	halfpercDMSO	2	A	11	QX307	norm.n	14.4465385843596
1001	20140512	RIAILs	1	e	carmustine	halfpercDMSO	2	A	11	QX453	norm.n	-17.0864219854062
1002	20140513	RIAILs	1	f	carmustine	halfpercDMSO	2	A	11	QX416	norm.n	-10.6222811042563
1003	20140520	RIAILs	1	h	carmustine	halfpercDMSO	2	A	11	QX561	norm.n	9.74857706706072
1004	20140527	RIAILs	1	j	carmustine	halfpercDMSO	2	A	11	QX475	norm.n	-28.9320782215924
1005	20140603	RIAILs	1	k	carmustine	halfpercDMSO	2	A	11	QX77	norm.n	-10.6961146041521
1006	20140623	RIAILs	1	l	carmustine	halfpercDMSO	2	A	11	QX437	norm.n	7.91661755468223
1007	20140429	RIAILs	1	b	carmustine	halfpercDMSO	2	A	11	QX307	q10.EXT	2.77443988033308
1008	20140512	RIAILs	1	e	carmustine	halfpercDMSO	2	A	11	QX453	q10.EXT	-3.36621414080971
1009	20140513	RIAILs	1	f	carmustine	halfpercDMSO	2	A	11	QX416	q10.EXT	-0.873925087574718
1010	20140520	RIAILs	1	h	carmustine	halfpercDMSO	2	A	11	QX561	q10.EXT	7.49906055439513
1011	20140527	RIAILs	1	j	carmustine	halfpercDMSO	2	A	11	QX475	q10.EXT	-18.3486933389947
1012	20140603	RIAILs	1	k	carmustine	halfpercDMSO	2	A	11	QX77	q10.EXT	-18.5238988564151
1013	20140623	RIAILs	1	l	carmustine	halfpercDMSO	2	A	11	QX437	q10.EXT	41.3810579919302
1014	20140429	RIAILs	1	b	carmustine	halfpercDMSO	2	A	11	QX307	q10.norm.EXT	0.0532006365931913
1015	20140512	RIAILs	1	e	carmustine	halfpercDMSO	2	A	11	QX453	q10.norm.EXT	0.0391181062577719
1016	20140513	RIAILs	1	f	carmustine	halfpercDMSO	2	A	11	QX416	q10.norm.EXT	0.059156156821197
1017	20140520	RIAILs	1	h	carmustine	halfpercDMSO	2	A	11	QX561	q10.norm.EXT	-0.063613460777564
1018	20140527	RIAILs	1	j	carmustine	halfpercDMSO	2	A	11	QX475	q10.norm.EXT	-0.0166044841794685
1019	20140603	RIAILs	1	k	carmustine	halfpercDMSO	2	A	11	QX77	q10.norm.EXT	-0.107627503795572
1020	20140623	RIAILs	1	l	carmustine	halfpercDMSO	2	A	11	QX437	q10.norm.EXT	0.0189947040093558
1021	20140429	RIAILs	1	b	carmustine	halfpercDMSO	2	A	11	QX307	q10.TOF	-2.21466156487276
1022	20140512	RIAILs	1	e	carmustine	halfpercDMSO	2	A	11	QX453	q10.TOF	-1.49081558490971
1023	20140513	RIAILs	1	f	carmustine	halfpercDMSO	2	A	11	QX416	q10.TOF	-3.26682446472306
1024	20140520	RIAILs	1	h	carmustine	halfpercDMSO	2	A	11	QX561	q10.TOF	3.24487645932344
1025	20140527	RIAILs	1	j	carmustine	halfpercDMSO	2	A	11	QX475	q10.TOF	-7.63726737347744
1026	20140603	RIAILs	1	k	carmustine	halfpercDMSO	2	A	11	QX77	q10.TOF	-3.25316524517988
1027	20140623	RIAILs	1	l	carmustine	halfpercDMSO	2	A	11	QX437	q10.TOF	18.6956981470448
1028	20140429	RIAILs	1	b	carmustine	halfpercDMSO	2	A	11	QX307	q25.EXT	62.6125364052448
1029	20140512	RIAILs	1	e	carmustine	halfpercDMSO	2	A	11	QX453	q25.EXT	20.5443387041321
1030	20140513	RIAILs	1	f	carmustine	halfpercDMSO	2	A	11	QX416	q25.EXT	23.1120270574549
1031	20140520	RIAILs	1	h	carmustine	halfpercDMSO	2	A	11	QX561	q25.EXT	-14.2346642623957
1032	20140527	RIAILs	1	j	carmustine	halfpercDMSO	2	A	11	QX475	q25.EXT	-19.8796834296542
1033	20140603	RIAILs	1	k	carmustine	halfpercDMSO	2	A	11	QX77	q25.EXT	-28.8815686173159
1034	20140623	RIAILs	1	l	carmustine	halfpercDMSO	2	A	11	QX437	q25.EXT	43.4116651379559
1035	20140429	RIAILs	1	b	carmustine	halfpercDMSO	2	A	11	QX307	q25.norm.EXT	0.168931653430431
1036	20140512	RIAILs	1	e	carmustine	halfpercDMSO	2	A	11	QX453	q25.norm.EXT	0.155508501945288
1037	20140513	RIAILs	1	f	carmustine	halfpercDMSO	2	A	11	QX416	q25.norm.EXT	0.183734014699916
1038	20140520	RIAILs	1	h	carmustine	halfpercDMSO	2	A	11	QX561	q25.norm.EXT	0.0380065268063588
1039	20140527	RIAILs	1	j	carmustine	halfpercDMSO	2	A	11	QX475	q25.norm.EXT	-0.0170332705430216
1040	20140603	RIAILs	1	k	carmustine	halfpercDMSO	2	A	11	QX77	q25.norm.EXT	0.0103014040423425
1041	20140623	RIAILs	1	l	carmustine	halfpercDMSO	2	A	11	QX437	q25.norm.EXT	0.0343479215200911
1042	20140429	RIAILs	1	b	carmustine	halfpercDMSO	2	A	11	QX307	q25.TOF	23.4034022293171
1043	20140512	RIAILs	1	e	carmustine	halfpercDMSO	2	A	11	QX453	q25.TOF	-3.11029604668286
1044	20140513	RIAILs	1	f	carmustine	halfpercDMSO	2	A	11	QX416	q25.TOF	8.3797486388871
1045	20140520	RIAILs	1	h	carmustine	halfpercDMSO	2	A	11	QX561	q25.TOF	-1.34514882169444
1046	20140527	RIAILs	1	j	carmustine	halfpercDMSO	2	A	11	QX475	q25.TOF	-21.3922690684438
1047	20140603	RIAILs	1	k	carmustine	halfpercDMSO	2	A	11	QX77	q25.TOF	-7.14518084389
1048	20140623	RIAILs	1	l	carmustine	halfpercDMSO	2	A	11	QX437	q25.TOF	23.7148021399528
1049	20140429	RIAILs	1	b	carmustine	halfpercDMSO	2	A	11	QX307	q75.EXT	188.0787186212
1050	20140512	RIAILs	1	e	carmustine	halfpercDMSO	2	A	11	QX453	q75.EXT	204.018228472792
1051	20140513	RIAILs	1	f	carmustine	halfpercDMSO	2	A	11	QX416	q75.EXT	19.3415907743954
1052	20140520	RIAILs	1	h	carmustine	halfpercDMSO	2	A	11	QX561	q75.EXT	-79.8397778549818
1053	20140527	RIAILs	1	j	carmustine	halfpercDMSO	2	A	11	QX475	q75.EXT	-262.042963186701
1054	20140603	RIAILs	1	k	carmustine	halfpercDMSO	2	A	11	QX77	q75.EXT	-342.847749632848
1055	20140623	RIAILs	1	l	carmustine	halfpercDMSO	2	A	11	QX437	q75.EXT	-129.399217636642
1056	20140429	RIAILs	1	b	carmustine	halfpercDMSO	2	A	11	QX307	q75.norm.EXT	0.291630671279786
1057	20140512	RIAILs	1	e	carmustine	halfpercDMSO	2	A	11	QX453	q75.norm.EXT	0.231343895243115
1058	20140513	RIAILs	1	f	carmustine	halfpercDMSO	2	A	11	QX416	q75.norm.EXT	0.0642872755876885
1059	20140520	RIAILs	1	h	carmustine	halfpercDMSO	2	A	11	QX561	q75.norm.EXT	-0.00878360316411302
1060	20140527	RIAILs	1	j	carmustine	halfpercDMSO	2	A	11	QX475	q75.norm.EXT	0.117631020808098
1061	20140603	RIAILs	1	k	carmustine	halfpercDMSO	2	A	11	QX77	q75.norm.EXT	-0.329252797264271
1062	20140623	RIAILs	1	l	carmustine	halfpercDMSO	2	A	11	QX437	q75.norm.EXT	-0.0656569623053499
1063	20140429	RIAILs	1	b	carmustine	halfpercDMSO	2	A	11	QX307	q75.TOF	41.7914839338135
1064	20140512	RIAILs	1	e	carmustine	halfpercDMSO	2	A	11	QX453	q75.TOF	9.67891105187488
1065	20140513	RIAILs	1	f	carmustine	halfpercDMSO	2	A	11	QX416	q75.TOF	18.0755899525617
1066	20140520	RIAILs	1	h	carmustine	halfpercDMSO	2	A	11	QX561	q75.TOF	0.224663073249016
1067	20140527	RIAILs	1	j	carmustine	halfpercDMSO	2	A	11	QX475	q75.TOF	-86.7809528713506
1068	20140603	RIAILs	1	k	carmustine	halfpercDMSO	2	A	11	QX77	q75.TOF	-64.5887686891256
1069	20140623	RIAILs	1	l	carmustine	halfpercDMSO	2	A	11	QX437	q75.TOF	-45.8896916210882
1070	20140429	RIAILs	1	b	carmustine	halfpercDMSO	2	A	11	QX307	q90.EXT	139.501457758586
1071	20140512	RIAILs	1	e	carmustine	halfpercDMSO	2	A	11	QX453	q90.EXT	324.086076929402
1072	20140513	RIAILs	1	f	carmustine	halfpercDMSO	2	A	11	QX416	q90.EXT	-46.6804996767557
1073	20140520	RIAILs	1	h	carmustine	halfpercDMSO	2	A	11	QX561	q90.EXT	-4.15942153923003
1074	20140527	RIAILs	1	j	carmustine	halfpercDMSO	2	A	11	QX475	q90.EXT	-424.295060300165
1075	20140603	RIAILs	1	k	carmustine	halfpercDMSO	2	A	11	QX77	q90.EXT	-404.500762625466
1076	20140623	RIAILs	1	l	carmustine	halfpercDMSO	2	A	11	QX437	q90.EXT	-395.473148730334
1077	20140429	RIAILs	1	b	carmustine	halfpercDMSO	2	A	11	QX307	q90.norm.EXT	0.222735487248227
1078	20140512	RIAILs	1	e	carmustine	halfpercDMSO	2	A	11	QX453	q90.norm.EXT	0.425281625731878
1079	20140513	RIAILs	1	f	carmustine	halfpercDMSO	2	A	11	QX416	q90.norm.EXT	0.380367194827925
1080	20140520	RIAILs	1	h	carmustine	halfpercDMSO	2	A	11	QX561	q90.norm.EXT	-0.0403549608736851
1081	20140527	RIAILs	1	j	carmustine	halfpercDMSO	2	A	11	QX475	q90.norm.EXT	-0.0136637604565028
1082	20140603	RIAILs	1	k	carmustine	halfpercDMSO	2	A	11	QX77	q90.norm.EXT	-0.372403322694353
1083	20140623	RIAILs	1	l	carmustine	halfpercDMSO	2	A	11	QX437	q90.norm.EXT	-0.0886607312596877
1084	20140429	RIAILs	1	b	carmustine	halfpercDMSO	2	A	11	QX307	q90.TOF	10.2571842181864
1085	20140512	RIAILs	1	e	carmustine	halfpercDMSO	2	A	11	QX453	q90.TOF	86.5771319240803
1086	20140513	RIAILs	1	f	carmustine	halfpercDMSO	2	A	11	QX416	q90.TOF	-18.4173641822254
1087	20140520	RIAILs	1	h	carmustine	halfpercDMSO	2	A	11	QX561	q90.TOF	-10.6932747319849
1088	20140527	RIAILs	1	j	carmustine	halfpercDMSO	2	A	11	QX475	q90.TOF	-100.523881569158
1089	20140603	RIAILs	1	k	carmustine	halfpercDMSO	2	A	11	QX77	q90.TOF	-73.9572809207627
1090	20140623	RIAILs	1	l	carmustine	halfpercDMSO	2	A	11	QX437	q90.TOF	-87.7519964885732
1091	20140429	RIAILs	1	b	carmustine	halfpercDMSO	2	A	11	QX307	var.EXT	114518.212899984
1092	20140512	RIAILs	1	e	carmustine	halfpercDMSO	2	A	11	QX453	var.EXT	231794.029720783
1093	20140513	RIAILs	1	f	carmustine	halfpercDMSO	2	A	11	QX416	var.EXT	67693.7358455715
1094	20140520	RIAILs	1	h	carmustine	halfpercDMSO	2	A	11	QX561	var.EXT	-104663.027447015
1095	20140527	RIAILs	1	j	carmustine	halfpercDMSO	2	A	11	QX475	var.EXT	-145407.869021546
1096	20140603	RIAILs	1	k	carmustine	halfpercDMSO	2	A	11	QX77	var.EXT	-398552.300368605
1097	20140623	RIAILs	1	l	carmustine	halfpercDMSO	2	A	11	QX437	var.EXT	-253196.903683094
1098	20140429	RIAILs	1	b	carmustine	halfpercDMSO	2	A	11	QX307	var.TOF	330.842027681534
1099	20140512	RIAILs	1	e	carmustine	halfpercDMSO	2	A	11	QX453	var.TOF	11090.9648216488
1100	20140513	RIAILs	1	f	carmustine	halfpercDMSO	2	A	11	QX416	var.TOF	-565.454074815406
1101	20140520	RIAILs	1	h	carmustine	halfpercDMSO	2	A	11	QX561	var.TOF	-3102.33584678545
1102	20140527	RIAILs	1	j	carmustine	halfpercDMSO	2	A	11	QX475	var.TOF	-9197.11404581324
1103	20140603	RIAILs	1	k	carmustine	halfpercDMSO	2	A	11	QX77	var.TOF	-18720.7986120231
1104	20140623	RIAILs	1	l	carmustine	halfpercDMSO	2	A	11	QX437	var.TOF	-15562.8999112062
1105	20140429	RIAILs	1	b	carmustine	halfpercDMSO	2	B	1	QX482	cv.EXT	-0.0363876892668073
1106	20140512	RIAILs	1	e	carmustine	halfpercDMSO	2	B	1	QX352	cv.EXT	0.0986611138879924
1107	20140513	RIAILs	1	f	carmustine	halfpercDMSO	2	B	1	QX108	cv.EXT	-0.0943793348550103
1108	20140520	RIAILs	1	h	carmustine	halfpercDMSO	2	B	1	QX132	cv.EXT	-0.0394885548810497
1109	20140526	RIAILs	1	i	carmustine	halfpercDMSO	2	B	1	QX51	cv.EXT	-0.0218273023418282
1110	20140603	RIAILs	1	k	carmustine	halfpercDMSO	2	B	1	QX418	cv.EXT	-0.0968974273545466
1111	20140623	RIAILs	1	l	carmustine	halfpercDMSO	2	B	1	QX426	cv.EXT	-0.00478007353073681
1112	20140624	RIAILs	1	m	carmustine	halfpercDMSO	2	B	1	QX278	cv.EXT	-0.108341854213581
1113	20140429	RIAILs	1	b	carmustine	halfpercDMSO	2	B	1	QX482	cv.TOF	-0.053841631569116
1114	20140512	RIAILs	1	e	carmustine	halfpercDMSO	2	B	1	QX352	cv.TOF	0.0493017172092519
1115	20140513	RIAILs	1	f	carmustine	halfpercDMSO	2	B	1	QX108	cv.TOF	-0.0921271137468255
1116	20140520	RIAILs	1	h	carmustine	halfpercDMSO	2	B	1	QX132	cv.TOF	-0.0630945056345425
1117	20140526	RIAILs	1	i	carmustine	halfpercDMSO	2	B	1	QX51	cv.TOF	-0.0227681359954784
1118	20140603	RIAILs	1	k	carmustine	halfpercDMSO	2	B	1	QX418	cv.TOF	-0.0993742248778185
1119	20140623	RIAILs	1	l	carmustine	halfpercDMSO	2	B	1	QX426	cv.TOF	-0.0393894766512139
1120	20140624	RIAILs	1	m	carmustine	halfpercDMSO	2	B	1	QX278	cv.TOF	-0.0284045534500705
1121	20140429	RIAILs	1	b	carmustine	halfpercDMSO	2	B	1	QX482	mean.EXT	29.5981875704601
1122	20140512	RIAILs	1	e	carmustine	halfpercDMSO	2	B	1	QX352	mean.EXT	-104.66913908631
1123	20140513	RIAILs	1	f	carmustine	halfpercDMSO	2	B	1	QX108	mean.EXT	21.9642614032154
1124	20140520	RIAILs	1	h	carmustine	halfpercDMSO	2	B	1	QX132	mean.EXT	-98.9435486278279
1125	20140526	RIAILs	1	i	carmustine	halfpercDMSO	2	B	1	QX51	mean.EXT	15.9086459703867
1126	20140603	RIAILs	1	k	carmustine	halfpercDMSO	2	B	1	QX418	mean.EXT	11.1825358792907
1127	20140623	RIAILs	1	l	carmustine	halfpercDMSO	2	B	1	QX426	mean.EXT	-1.14100289957136
1128	20140624	RIAILs	1	m	carmustine	halfpercDMSO	2	B	1	QX278	mean.EXT	120.474272071417
1129	20140429	RIAILs	1	b	carmustine	halfpercDMSO	2	B	1	QX482	mean.norm.EXT	0.0552070070928051
1130	20140512	RIAILs	1	e	carmustine	halfpercDMSO	2	B	1	QX352	mean.norm.EXT	0.0153581292444342
1131	20140513	RIAILs	1	f	carmustine	halfpercDMSO	2	B	1	QX108	mean.norm.EXT	0.0410443818314362
1132	20140520	RIAILs	1	h	carmustine	halfpercDMSO	2	B	1	QX132	mean.norm.EXT	-0.146374843409055
1133	20140526	RIAILs	1	i	carmustine	halfpercDMSO	2	B	1	QX51	mean.norm.EXT	-0.016882131211812
1134	20140603	RIAILs	1	k	carmustine	halfpercDMSO	2	B	1	QX418	mean.norm.EXT	0.150965485251921
1135	20140623	RIAILs	1	l	carmustine	halfpercDMSO	2	B	1	QX426	mean.norm.EXT	0.0946425712224349
1136	20140624	RIAILs	1	m	carmustine	halfpercDMSO	2	B	1	QX278	mean.norm.EXT	0.0868097363730314
1137	20140429	RIAILs	1	b	carmustine	halfpercDMSO	2	B	1	QX482	mean.TOF	10.5309365390547
1138	20140512	RIAILs	1	e	carmustine	halfpercDMSO	2	B	1	QX352	mean.TOF	-29.7066342749638
1139	20140513	RIAILs	1	f	carmustine	halfpercDMSO	2	B	1	QX108	mean.TOF	7.71367335993953
1140	20140520	RIAILs	1	h	carmustine	halfpercDMSO	2	B	1	QX132	mean.TOF	-6.50376590870273
1141	20140526	RIAILs	1	i	carmustine	halfpercDMSO	2	B	1	QX51	mean.TOF	6.06032614121467
1142	20140603	RIAILs	1	k	carmustine	halfpercDMSO	2	B	1	QX418	mean.TOF	-0.403238400319043
1143	20140623	RIAILs	1	l	carmustine	halfpercDMSO	2	B	1	QX426	mean.TOF	-12.2487658835326
1144	20140624	RIAILs	1	m	carmustine	halfpercDMSO	2	B	1	QX278	mean.TOF	33.5932256759847
1145	20140429	RIAILs	1	b	carmustine	halfpercDMSO	2	B	1	QX482	median.EXT	158.525911510624
1146	20140512	RIAILs	1	e	carmustine	halfpercDMSO	2	B	1	QX352	median.EXT	-63.5960841309627
1147	20140513	RIAILs	1	f	carmustine	halfpercDMSO	2	B	1	QX108	median.EXT	82.7053372144855
1148	20140520	RIAILs	1	h	carmustine	halfpercDMSO	2	B	1	QX132	median.EXT	-12.3604298672628
1149	20140526	RIAILs	1	i	carmustine	halfpercDMSO	2	B	1	QX51	median.EXT	-39.0439644826901
1150	20140603	RIAILs	1	k	carmustine	halfpercDMSO	2	B	1	QX418	median.EXT	115.642051588331
1151	20140623	RIAILs	1	l	carmustine	halfpercDMSO	2	B	1	QX426	median.EXT	6.00586645456548
1152	20140624	RIAILs	1	m	carmustine	halfpercDMSO	2	B	1	QX278	median.EXT	92.4201814160378
1153	20140429	RIAILs	1	b	carmustine	halfpercDMSO	2	B	1	QX482	median.norm.EXT	0.0982020063493476
1154	20140512	RIAILs	1	e	carmustine	halfpercDMSO	2	B	1	QX352	median.norm.EXT	0.092758032887368
1155	20140513	RIAILs	1	f	carmustine	halfpercDMSO	2	B	1	QX108	median.norm.EXT	0.0664252386677352
1156	20140520	RIAILs	1	h	carmustine	halfpercDMSO	2	B	1	QX132	median.norm.EXT	-0.0825168358298243
1157	20140526	RIAILs	1	i	carmustine	halfpercDMSO	2	B	1	QX51	median.norm.EXT	-0.166501232740271
1158	20140603	RIAILs	1	k	carmustine	halfpercDMSO	2	B	1	QX418	median.norm.EXT	0.140560026789277
1159	20140623	RIAILs	1	l	carmustine	halfpercDMSO	2	B	1	QX426	median.norm.EXT	0.0783313768864387
1160	20140624	RIAILs	1	m	carmustine	halfpercDMSO	2	B	1	QX278	median.norm.EXT	0.187826231248037
1161	20140429	RIAILs	1	b	carmustine	halfpercDMSO	2	B	1	QX482	median.TOF	33.3688376933116
1162	20140512	RIAILs	1	e	carmustine	halfpercDMSO	2	B	1	QX352	median.TOF	-21.358318779956
1163	20140513	RIAILs	1	f	carmustine	halfpercDMSO	2	B	1	QX108	median.TOF	14.5472091358566
1164	20140520	RIAILs	1	h	carmustine	halfpercDMSO	2	B	1	QX132	median.TOF	3.47301447353022
1165	20140526	RIAILs	1	i	carmustine	halfpercDMSO	2	B	1	QX51	median.TOF	15.5964348336621
1166	20140603	RIAILs	1	k	carmustine	halfpercDMSO	2	B	1	QX418	median.TOF	9.72876136368981
1167	20140623	RIAILs	1	l	carmustine	halfpercDMSO	2	B	1	QX426	median.TOF	-16.4454705883436
1168	20140624	RIAILs	1	m	carmustine	halfpercDMSO	2	B	1	QX278	median.TOF	49.7260195775398
1169	20140429	RIAILs	1	b	carmustine	halfpercDMSO	2	B	1	QX482	n	14.0251825323644
1170	20140512	RIAILs	1	e	carmustine	halfpercDMSO	2	B	1	QX352	n	-67.646516037134
1171	20140513	RIAILs	1	f	carmustine	halfpercDMSO	2	B	1	QX108	n	29.2537457544857
1172	20140520	RIAILs	1	h	carmustine	halfpercDMSO	2	B	1	QX132	n	71.2017021570956
1173	20140526	RIAILs	1	i	carmustine	halfpercDMSO	2	B	1	QX51	n	29.1406251337569
1174	20140603	RIAILs	1	k	carmustine	halfpercDMSO	2	B	1	QX418	n	-40.7525768628184
1175	20140623	RIAILs	1	l	carmustine	halfpercDMSO	2	B	1	QX426	n	-58.8701501580916
1176	20140624	RIAILs	1	m	carmustine	halfpercDMSO	2	B	1	QX278	n	-12.0924996730843
1177	20140429	RIAILs	1	b	carmustine	halfpercDMSO	2	B	1	QX482	norm.n	5.27654121128527
1178	20140512	RIAILs	1	e	carmustine	halfpercDMSO	2	B	1	QX352	norm.n	-22.5545165545389
1179	20140513	RIAILs	1	f	carmustine	halfpercDMSO	2	B	1	QX108	norm.n	10.5484417556603
1180	20140520	RIAILs	1	h	carmustine	halfpercDMSO	2	B	1	QX132	norm.n	24.1884596551547
1181	20140526	RIAILs	1	i	carmustine	halfpercDMSO	2	B	1	QX51	norm.n	10.8378539863374
1182	20140603	RIAILs	1	k	carmustine	halfpercDMSO	2	B	1	QX418	norm.n	-13.5088042278148
1183	20140623	RIAILs	1	l	carmustine	halfpercDMSO	2	B	1	QX426	norm.n	-19.620250927988
1184	20140624	RIAILs	1	m	carmustine	halfpercDMSO	2	B	1	QX278	norm.n	-4.86108343527048
1185	20140429	RIAILs	1	b	carmustine	halfpercDMSO	2	B	1	QX482	q10.EXT	0.134470067628034
1186	20140512	RIAILs	1	e	carmustine	halfpercDMSO	2	B	1	QX352	q10.EXT	3.54055607375265
1187	20140513	RIAILs	1	f	carmustine	halfpercDMSO	2	B	1	QX108	q10.EXT	4.28255615500002
1188	20140520	RIAILs	1	h	carmustine	halfpercDMSO	2	B	1	QX132	q10.EXT	2.10276043559111
1189	20140526	RIAILs	1	i	carmustine	halfpercDMSO	2	B	1	QX51	q10.EXT	0.564132228624902
1190	20140603	RIAILs	1	k	carmustine	halfpercDMSO	2	B	1	QX418	q10.EXT	49.8032594076158
1191	20140623	RIAILs	1	l	carmustine	halfpercDMSO	2	B	1	QX426	q10.EXT	11.9986517790564
1192	20140624	RIAILs	1	m	carmustine	halfpercDMSO	2	B	1	QX278	q10.EXT	-8.22351925005083
1193	20140429	RIAILs	1	b	carmustine	halfpercDMSO	2	B	1	QX482	q10.norm.EXT	-0.0164875996553985
1194	20140512	RIAILs	1	e	carmustine	halfpercDMSO	2	B	1	QX352	q10.norm.EXT	0.0382890339853056
1195	20140513	RIAILs	1	f	carmustine	halfpercDMSO	2	B	1	QX108	q10.norm.EXT	-7.77538945899967e-05
1196	20140520	RIAILs	1	h	carmustine	halfpercDMSO	2	B	1	QX132	q10.norm.EXT	-0.0172730196679792
1197	20140526	RIAILs	1	i	carmustine	halfpercDMSO	2	B	1	QX51	q10.norm.EXT	-0.0172835569080646
1198	20140603	RIAILs	1	k	carmustine	halfpercDMSO	2	B	1	QX418	q10.norm.EXT	0.141791271609843
1199	20140623	RIAILs	1	l	carmustine	halfpercDMSO	2	B	1	QX426	q10.norm.EXT	0.0369187217161604
1200	20140624	RIAILs	1	m	carmustine	halfpercDMSO	2	B	1	QX278	q10.norm.EXT	0.00927515704992114
1201	20140429	RIAILs	1	b	carmustine	halfpercDMSO	2	B	1	QX482	q10.TOF	-3.16780108481028
1202	20140512	RIAILs	1	e	carmustine	halfpercDMSO	2	B	1	QX352	q10.TOF	-9.20474531540673
1203	20140513	RIAILs	1	f	carmustine	halfpercDMSO	2	B	1	QX108	q10.TOF	6.25230226183315
1204	20140520	RIAILs	1	h	carmustine	halfpercDMSO	2	B	1	QX132	q10.TOF	4.7118200022702
1205	20140526	RIAILs	1	i	carmustine	halfpercDMSO	2	B	1	QX51	q10.TOF	3.75785274325746
1206	20140603	RIAILs	1	k	carmustine	halfpercDMSO	2	B	1	QX418	q10.TOF	7.41186562511125
1207	20140623	RIAILs	1	l	carmustine	halfpercDMSO	2	B	1	QX426	q10.TOF	8.01578120992877
1208	20140624	RIAILs	1	m	carmustine	halfpercDMSO	2	B	1	QX278	q10.TOF	-3.84758779479878
1209	20140429	RIAILs	1	b	carmustine	halfpercDMSO	2	B	1	QX482	q25.EXT	1.58103480029654
1210	20140512	RIAILs	1	e	carmustine	halfpercDMSO	2	B	1	QX352	q25.EXT	-31.5382862681681
1211	20140513	RIAILs	1	f	carmustine	halfpercDMSO	2	B	1	QX108	q25.EXT	21.1018824728106
1212	20140520	RIAILs	1	h	carmustine	halfpercDMSO	2	B	1	QX132	q25.EXT	42.7405082015012
1213	20140526	RIAILs	1	i	carmustine	halfpercDMSO	2	B	1	QX51	q25.EXT	-12.1113055938184
1214	20140603	RIAILs	1	k	carmustine	halfpercDMSO	2	B	1	QX418	q25.EXT	19.8660287178999
1215	20140623	RIAILs	1	l	carmustine	halfpercDMSO	2	B	1	QX426	q25.EXT	31.6608642496946
1216	20140624	RIAILs	1	m	carmustine	halfpercDMSO	2	B	1	QX278	q25.EXT	-7.5596121440615
1217	20140429	RIAILs	1	b	carmustine	halfpercDMSO	2	B	1	QX482	q25.norm.EXT	0.0583401453551807
1218	20140512	RIAILs	1	e	carmustine	halfpercDMSO	2	B	1	QX352	q25.norm.EXT	0.0542576395926716
1219	20140513	RIAILs	1	f	carmustine	halfpercDMSO	2	B	1	QX108	q25.norm.EXT	-0.00116545890740831
1220	20140520	RIAILs	1	h	carmustine	halfpercDMSO	2	B	1	QX132	q25.norm.EXT	0.0360200562943107
1221	20140526	RIAILs	1	i	carmustine	halfpercDMSO	2	B	1	QX51	q25.norm.EXT	-0.0946461303828477
1222	20140603	RIAILs	1	k	carmustine	halfpercDMSO	2	B	1	QX418	q25.norm.EXT	0.149646775967275
1223	20140623	RIAILs	1	l	carmustine	halfpercDMSO	2	B	1	QX426	q25.norm.EXT	0.0250904034337541
1224	20140624	RIAILs	1	m	carmustine	halfpercDMSO	2	B	1	QX278	q25.norm.EXT	0.0474125883856403
1225	20140429	RIAILs	1	b	carmustine	halfpercDMSO	2	B	1	QX482	q25.TOF	6.02917340930532
1226	20140512	RIAILs	1	e	carmustine	halfpercDMSO	2	B	1	QX352	q25.TOF	-27.6831895489228
1227	20140513	RIAILs	1	f	carmustine	halfpercDMSO	2	B	1	QX108	q25.TOF	31.8433018877671
1228	20140520	RIAILs	1	h	carmustine	halfpercDMSO	2	B	1	QX132	q25.TOF	14.289862576072
1229	20140526	RIAILs	1	i	carmustine	halfpercDMSO	2	B	1	QX51	q25.TOF	-4.32260289371222
1230	20140603	RIAILs	1	k	carmustine	halfpercDMSO	2	B	1	QX418	q25.TOF	18.5586180672197
1231	20140623	RIAILs	1	l	carmustine	halfpercDMSO	2	B	1	QX426	q25.TOF	17.2656233377321
1232	20140624	RIAILs	1	m	carmustine	halfpercDMSO	2	B	1	QX278	q25.TOF	-7.43536301631568
1233	20140429	RIAILs	1	b	carmustine	halfpercDMSO	2	B	1	QX482	q75.EXT	-79.9033626171163
1234	20140512	RIAILs	1	e	carmustine	halfpercDMSO	2	B	1	QX352	q75.EXT	-347.441686410401
1235	20140513	RIAILs	1	f	carmustine	halfpercDMSO	2	B	1	QX108	q75.EXT	110.774229045464
1236	20140520	RIAILs	1	h	carmustine	halfpercDMSO	2	B	1	QX132	q75.EXT	-255.164637909553
1237	20140526	RIAILs	1	i	carmustine	halfpercDMSO	2	B	1	QX51	q75.EXT	83.2257872058863
1238	20140603	RIAILs	1	k	carmustine	halfpercDMSO	2	B	1	QX418	q75.EXT	34.8106655852178
1239	20140623	RIAILs	1	l	carmustine	halfpercDMSO	2	B	1	QX426	q75.EXT	-95.5140970836607
1240	20140624	RIAILs	1	m	carmustine	halfpercDMSO	2	B	1	QX278	q75.EXT	342.226837596201
1241	20140429	RIAILs	1	b	carmustine	halfpercDMSO	2	B	1	QX482	q75.norm.EXT	0.086090708516928
1242	20140512	RIAILs	1	e	carmustine	halfpercDMSO	2	B	1	QX352	q75.norm.EXT	0.037883692889211
1243	20140513	RIAILs	1	f	carmustine	halfpercDMSO	2	B	1	QX108	q75.norm.EXT	0.0947512028231375
1244	20140520	RIAILs	1	h	carmustine	halfpercDMSO	2	B	1	QX132	q75.norm.EXT	-0.29194539600106
1245	20140526	RIAILs	1	i	carmustine	halfpercDMSO	2	B	1	QX51	q75.norm.EXT	0.0499378473139103
1246	20140603	RIAILs	1	k	carmustine	halfpercDMSO	2	B	1	QX418	q75.norm.EXT	0.205142904953298
1247	20140623	RIAILs	1	l	carmustine	halfpercDMSO	2	B	1	QX426	q75.norm.EXT	0.169089775320555
1248	20140624	RIAILs	1	m	carmustine	halfpercDMSO	2	B	1	QX278	q75.norm.EXT	0.165108519663954
1249	20140429	RIAILs	1	b	carmustine	halfpercDMSO	2	B	1	QX482	q75.TOF	10.2476479903426
1250	20140512	RIAILs	1	e	carmustine	halfpercDMSO	2	B	1	QX352	q75.TOF	-65.4143859226458
1251	20140513	RIAILs	1	f	carmustine	halfpercDMSO	2	B	1	QX108	q75.TOF	25.5059703188029
1252	20140520	RIAILs	1	h	carmustine	halfpercDMSO	2	B	1	QX132	q75.TOF	-24.8367543272266
1253	20140526	RIAILs	1	i	carmustine	halfpercDMSO	2	B	1	QX51	q75.TOF	14.8208646077057
1254	20140603	RIAILs	1	k	carmustine	halfpercDMSO	2	B	1	QX418	q75.TOF	-12.135417176386
1255	20140623	RIAILs	1	l	carmustine	halfpercDMSO	2	B	1	QX426	q75.TOF	-20.6831744674265
1256	20140624	RIAILs	1	m	carmustine	halfpercDMSO	2	B	1	QX278	q75.TOF	94.6156830239284
1257	20140429	RIAILs	1	b	carmustine	halfpercDMSO	2	B	1	QX482	q90.EXT	150.115047401839
1258	20140512	RIAILs	1	e	carmustine	halfpercDMSO	2	B	1	QX352	q90.EXT	-168.370782467903
1259	20140513	RIAILs	1	f	carmustine	halfpercDMSO	2	B	1	QX108	q90.EXT	-19.4271743146103
1260	20140520	RIAILs	1	h	carmustine	halfpercDMSO	2	B	1	QX132	q90.EXT	-215.718025535152
1261	20140526	RIAILs	1	i	carmustine	halfpercDMSO	2	B	1	QX51	q90.EXT	181.438932969101
1262	20140603	RIAILs	1	k	carmustine	halfpercDMSO	2	B	1	QX418	q90.EXT	-47.3138580822497
1263	20140623	RIAILs	1	l	carmustine	halfpercDMSO	2	B	1	QX426	q90.EXT	-30.5174292762869
1264	20140624	RIAILs	1	m	carmustine	halfpercDMSO	2	B	1	QX278	q90.EXT	295.82448635933
1265	20140429	RIAILs	1	b	carmustine	halfpercDMSO	2	B	1	QX482	q90.norm.EXT	0.0937225483230504
1266	20140512	RIAILs	1	e	carmustine	halfpercDMSO	2	B	1	QX352	q90.norm.EXT	0.082498431492359
1267	20140513	RIAILs	1	f	carmustine	halfpercDMSO	2	B	1	QX108	q90.norm.EXT	-0.00488544796957025
1268	20140520	RIAILs	1	h	carmustine	halfpercDMSO	2	B	1	QX132	q90.norm.EXT	-0.337323554573384
1269	20140526	RIAILs	1	i	carmustine	halfpercDMSO	2	B	1	QX51	q90.norm.EXT	0.0891392037682776
1270	20140603	RIAILs	1	k	carmustine	halfpercDMSO	2	B	1	QX418	q90.norm.EXT	0.0494234628642903
1271	20140623	RIAILs	1	l	carmustine	halfpercDMSO	2	B	1	QX426	q90.norm.EXT	0.0836698767293334
1272	20140624	RIAILs	1	m	carmustine	halfpercDMSO	2	B	1	QX278	q90.norm.EXT	0.196108563576449
1273	20140429	RIAILs	1	b	carmustine	halfpercDMSO	2	B	1	QX482	q90.TOF	11.9109412961379
1274	20140512	RIAILs	1	e	carmustine	halfpercDMSO	2	B	1	QX352	q90.TOF	-32.8842644975181
1275	20140513	RIAILs	1	f	carmustine	halfpercDMSO	2	B	1	QX108	q90.TOF	-5.81727029141772
1276	20140520	RIAILs	1	h	carmustine	halfpercDMSO	2	B	1	QX132	q90.TOF	-10.0936424709824
1277	20140526	RIAILs	1	i	carmustine	halfpercDMSO	2	B	1	QX51	q90.TOF	6.80068620162843
1278	20140603	RIAILs	1	k	carmustine	halfpercDMSO	2	B	1	QX418	q90.TOF	-9.36487331900543
1279	20140623	RIAILs	1	l	carmustine	halfpercDMSO	2	B	1	QX426	q90.TOF	-31.7978247262202
1280	20140624	RIAILs	1	m	carmustine	halfpercDMSO	2	B	1	QX278	q90.TOF	57.159855756795
1281	20140429	RIAILs	1	b	carmustine	halfpercDMSO	2	B	1	QX482	var.EXT	3828.12107410178
1282	20140512	RIAILs	1	e	carmustine	halfpercDMSO	2	B	1	QX352	var.EXT	-45612.1796236423
1283	20140513	RIAILs	1	f	carmustine	halfpercDMSO	2	B	1	QX108	var.EXT	-122539.057173825
1284	20140520	RIAILs	1	h	carmustine	halfpercDMSO	2	B	1	QX132	var.EXT	-176011.267009984
1285	20140526	RIAILs	1	i	carmustine	halfpercDMSO	2	B	1	QX51	var.EXT	17550.668993555
1286	20140603	RIAILs	1	k	carmustine	halfpercDMSO	2	B	1	QX418	var.EXT	-116909.615922034
1287	20140623	RIAILs	1	l	carmustine	halfpercDMSO	2	B	1	QX426	var.EXT	-2408.26950347025
1288	20140624	RIAILs	1	m	carmustine	halfpercDMSO	2	B	1	QX278	var.EXT	61692.2674253247
1289	20140429	RIAILs	1	b	carmustine	halfpercDMSO	2	B	1	QX482	var.TOF	-2873.93205830714
1290	20140512	RIAILs	1	e	carmustine	halfpercDMSO	2	B	1	QX352	var.TOF	-1578.10891628021
1291	20140513	RIAILs	1	f	carmustine	halfpercDMSO	2	B	1	QX108	var.TOF	-8258.9241076343
1292	20140520	RIAILs	1	h	carmustine	halfpercDMSO	2	B	1	QX132	var.TOF	-4729.43032767627
1293	20140526	RIAILs	1	i	carmustine	halfpercDMSO	2	B	1	QX51	var.TOF	272.639756780673
1294	20140603	RIAILs	1	k	carmustine	halfpercDMSO	2	B	1	QX418	var.TOF	-10231.3825821085
1295	20140623	RIAILs	1	l	carmustine	halfpercDMSO	2	B	1	QX426	var.TOF	-7326.19163585509
1296	20140624	RIAILs	1	m	carmustine	halfpercDMSO	2	B	1	QX278	var.TOF	4254.37769547213
1297	20140429	RIAILs	1	b	carmustine	halfpercDMSO	2	B	3	QX158	cv.EXT	0.110121309589642
1298	20140512	RIAILs	1	e	carmustine	halfpercDMSO	2	B	3	QX506	cv.EXT	-0.00391485487770714
1299	20140513	RIAILs	1	f	carmustine	halfpercDMSO	2	B	3	QX37	cv.EXT	0.0393781411957396
1300	20140520	RIAILs	1	h	carmustine	halfpercDMSO	2	B	3	QX529	cv.EXT	-0.0583608031154963
1301	20140526	RIAILs	1	i	carmustine	halfpercDMSO	2	B	3	CB4856	cv.EXT	-0.0754042353551925
1302	20140603	RIAILs	1	k	carmustine	halfpercDMSO	2	B	3	QX553	cv.EXT	0.100009604939863
1303	20140623	RIAILs	1	l	carmustine	halfpercDMSO	2	B	3	QX245	cv.EXT	-0.0948500105102602
1304	20140624	RIAILs	1	m	carmustine	halfpercDMSO	2	B	3	QX487	cv.EXT	-0.0436011100065626
1305	20140429	RIAILs	1	b	carmustine	halfpercDMSO	2	B	3	QX158	cv.TOF	0.0220385867086826
1306	20140512	RIAILs	1	e	carmustine	halfpercDMSO	2	B	3	QX506	cv.TOF	0.00323324054475214
1307	20140513	RIAILs	1	f	carmustine	halfpercDMSO	2	B	3	QX37	cv.TOF	-0.00540146297609401
1308	20140520	RIAILs	1	h	carmustine	halfpercDMSO	2	B	3	QX529	cv.TOF	-0.0382579535947356
1309	20140526	RIAILs	1	i	carmustine	halfpercDMSO	2	B	3	CB4856	cv.TOF	-0.00828858710804092
1310	20140603	RIAILs	1	k	carmustine	halfpercDMSO	2	B	3	QX553	cv.TOF	0.0266775757060727
1311	20140623	RIAILs	1	l	carmustine	halfpercDMSO	2	B	3	QX245	cv.TOF	-0.0897877129800229
1312	20140624	RIAILs	1	m	carmustine	halfpercDMSO	2	B	3	QX487	cv.TOF	0.000467201989604831
1313	20140429	RIAILs	1	b	carmustine	halfpercDMSO	2	B	3	QX158	mean.EXT	-99.5288286320072
1314	20140512	RIAILs	1	e	carmustine	halfpercDMSO	2	B	3	QX506	mean.EXT	194.917227347419
1315	20140513	RIAILs	1	f	carmustine	halfpercDMSO	2	B	3	QX37	mean.EXT	140.315464259717
1316	20140520	RIAILs	1	h	carmustine	halfpercDMSO	2	B	3	QX529	mean.EXT	33.4050012788053
1317	20140526	RIAILs	1	i	carmustine	halfpercDMSO	2	B	3	CB4856	mean.EXT	73.4957276855518
1318	20140603	RIAILs	1	k	carmustine	halfpercDMSO	2	B	3	QX553	mean.EXT	-8.01716537736622
1319	20140623	RIAILs	1	l	carmustine	halfpercDMSO	2	B	3	QX245	mean.EXT	82.0027805153883
1320	20140624	RIAILs	1	m	carmustine	halfpercDMSO	2	B	3	QX487	mean.EXT	70.7599353108953
1321	20140429	RIAILs	1	b	carmustine	halfpercDMSO	2	B	3	QX158	mean.norm.EXT	-0.104884851705033
1322	20140512	RIAILs	1	e	carmustine	halfpercDMSO	2	B	3	QX506	mean.norm.EXT	0.260612391444245
1323	20140513	RIAILs	1	f	carmustine	halfpercDMSO	2	B	3	QX37	mean.norm.EXT	0.00487068033292233
1324	20140520	RIAILs	1	h	carmustine	halfpercDMSO	2	B	3	QX529	mean.norm.EXT	-0.00683725443718628
1325	20140526	RIAILs	1	i	carmustine	halfpercDMSO	2	B	3	CB4856	mean.norm.EXT	0.143402387391102
1326	20140603	RIAILs	1	k	carmustine	halfpercDMSO	2	B	3	QX553	mean.norm.EXT	0.179025379216405
1327	20140623	RIAILs	1	l	carmustine	halfpercDMSO	2	B	3	QX245	mean.norm.EXT	0.214257653469332
1328	20140624	RIAILs	1	m	carmustine	halfpercDMSO	2	B	3	QX487	mean.norm.EXT	0.0796810172743093
1329	20140429	RIAILs	1	b	carmustine	halfpercDMSO	2	B	3	QX158	mean.TOF	-19.9795017358969
1330	20140512	RIAILs	1	e	carmustine	halfpercDMSO	2	B	3	QX506	mean.TOF	33.0151665534671
1331	20140513	RIAILs	1	f	carmustine	halfpercDMSO	2	B	3	QX37	mean.TOF	22.0803141386212
1332	20140520	RIAILs	1	h	carmustine	halfpercDMSO	2	B	3	QX529	mean.TOF	15.2410321571415
1333	20140526	RIAILs	1	i	carmustine	halfpercDMSO	2	B	3	CB4856	mean.TOF	18.2045699186018
1334	20140603	RIAILs	1	k	carmustine	halfpercDMSO	2	B	3	QX553	mean.TOF	-19.0524829470589
1335	20140623	RIAILs	1	l	carmustine	halfpercDMSO	2	B	3	QX245	mean.TOF	12.1236235151592
1336	20140624	RIAILs	1	m	carmustine	halfpercDMSO	2	B	3	QX487	mean.TOF	9.66595264488683
1337	20140429	RIAILs	1	b	carmustine	halfpercDMSO	2	B	3	QX158	median.EXT	-125.857942546139
1338	20140512	RIAILs	1	e	carmustine	halfpercDMSO	2	B	3	QX506	median.EXT	133.635050711249
1339	20140513	RIAILs	1	f	carmustine	halfpercDMSO	2	B	3	QX37	median.EXT	74.2534404080886
1340	20140520	RIAILs	1	h	carmustine	halfpercDMSO	2	B	3	QX529	median.EXT	-11.0189140429583
1341	20140526	RIAILs	1	i	carmustine	halfpercDMSO	2	B	3	CB4856	median.EXT	54.8771240135369
1342	20140603	RIAILs	1	k	carmustine	halfpercDMSO	2	B	3	QX553	median.EXT	-49.4679988096867
1343	20140623	RIAILs	1	l	carmustine	halfpercDMSO	2	B	3	QX245	median.EXT	172.97538872847
1344	20140624	RIAILs	1	m	carmustine	halfpercDMSO	2	B	3	QX487	median.EXT	55.8042007648384
1345	20140429	RIAILs	1	b	carmustine	halfpercDMSO	2	B	3	QX158	median.norm.EXT	-0.13293848756199
1346	20140512	RIAILs	1	e	carmustine	halfpercDMSO	2	B	3	QX506	median.norm.EXT	0.374546015157728
1347	20140513	RIAILs	1	f	carmustine	halfpercDMSO	2	B	3	QX37	median.norm.EXT	0.0602458254194266
1348	20140520	RIAILs	1	h	carmustine	halfpercDMSO	2	B	3	QX529	median.norm.EXT	0.0411283382182582
1349	20140526	RIAILs	1	i	carmustine	halfpercDMSO	2	B	3	CB4856	median.norm.EXT	0.100237318850958
1350	20140603	RIAILs	1	k	carmustine	halfpercDMSO	2	B	3	QX553	median.norm.EXT	0.180964555253946
1351	20140623	RIAILs	1	l	carmustine	halfpercDMSO	2	B	3	QX245	median.norm.EXT	0.150091277470095
1352	20140624	RIAILs	1	m	carmustine	halfpercDMSO	2	B	3	QX487	median.norm.EXT	0.249971082882473
1353	20140429	RIAILs	1	b	carmustine	halfpercDMSO	2	B	3	QX158	median.TOF	-33.7522660518753
1354	20140512	RIAILs	1	e	carmustine	halfpercDMSO	2	B	3	QX506	median.TOF	42.9816683890794
1355	20140513	RIAILs	1	f	carmustine	halfpercDMSO	2	B	3	QX37	median.TOF	22.5460882827168
1356	20140520	RIAILs	1	h	carmustine	halfpercDMSO	2	B	3	QX529	median.TOF	16.8263449555381
1357	20140526	RIAILs	1	i	carmustine	halfpercDMSO	2	B	3	CB4856	median.TOF	14.8175599637901
1358	20140603	RIAILs	1	k	carmustine	halfpercDMSO	2	B	3	QX553	median.TOF	-10.6990247304539
1359	20140623	RIAILs	1	l	carmustine	halfpercDMSO	2	B	3	QX245	median.TOF	33.1523090903178
1360	20140624	RIAILs	1	m	carmustine	halfpercDMSO	2	B	3	QX487	median.TOF	3.84824417586654
1361	20140429	RIAILs	1	b	carmustine	halfpercDMSO	2	B	3	QX158	n	9.54051257753626
1362	20140512	RIAILs	1	e	carmustine	halfpercDMSO	2	B	3	QX506	n	-94.8417350335927
1363	20140513	RIAILs	1	f	carmustine	halfpercDMSO	2	B	3	QX37	n	-4.2989994536673
1364	20140520	RIAILs	1	h	carmustine	halfpercDMSO	2	B	3	QX529	n	17.1986999025902
1365	20140526	RIAILs	1	i	carmustine	halfpercDMSO	2	B	3	CB4856	n	26.3702570386912
1366	20140603	RIAILs	1	k	carmustine	halfpercDMSO	2	B	3	QX553	n	-17.6613471554131
1367	20140623	RIAILs	1	l	carmustine	halfpercDMSO	2	B	3	QX245	n	16.6115175422311
1368	20140624	RIAILs	1	m	carmustine	halfpercDMSO	2	B	3	QX487	n	-44.2862175422903
1369	20140429	RIAILs	1	b	carmustine	halfpercDMSO	2	B	3	QX158	norm.n	3.76013506657522
1370	20140512	RIAILs	1	e	carmustine	halfpercDMSO	2	B	3	QX506	norm.n	-31.6645778874177
1371	20140513	RIAILs	1	f	carmustine	halfpercDMSO	2	B	3	QX37	norm.n	-0.753167518516296
1372	20140520	RIAILs	1	h	carmustine	halfpercDMSO	2	B	3	QX529	norm.n	6.10661030331457
1373	20140526	RIAILs	1	i	carmustine	halfpercDMSO	2	B	3	CB4856	norm.n	10.0174147195961
1374	20140603	RIAILs	1	k	carmustine	halfpercDMSO	2	B	3	QX553	norm.n	-5.96103676736909
1375	20140623	RIAILs	1	l	carmustine	halfpercDMSO	2	B	3	QX245	norm.n	5.48097253154869
1376	20140624	RIAILs	1	m	carmustine	halfpercDMSO	2	B	3	QX487	norm.n	-15.5968867588959
1377	20140429	RIAILs	1	b	carmustine	halfpercDMSO	2	B	3	QX158	q10.EXT	7.3699595148318
1378	20140512	RIAILs	1	e	carmustine	halfpercDMSO	2	B	3	QX506	q10.EXT	2.92142711994321
1379	20140513	RIAILs	1	f	carmustine	halfpercDMSO	2	B	3	QX37	q10.EXT	-6.05633130044847
1380	20140520	RIAILs	1	h	carmustine	halfpercDMSO	2	B	3	QX529	q10.EXT	-0.528576320989833
1381	20140526	RIAILs	1	i	carmustine	halfpercDMSO	2	B	3	CB4856	q10.EXT	-4.63078365997152
1382	20140603	RIAILs	1	k	carmustine	halfpercDMSO	2	B	3	QX553	q10.EXT	16.0591369042882
1383	20140623	RIAILs	1	l	carmustine	halfpercDMSO	2	B	3	QX245	q10.EXT	27.0659307922679
1384	20140624	RIAILs	1	m	carmustine	halfpercDMSO	2	B	3	QX487	q10.EXT	-6.74836186309343
1385	20140429	RIAILs	1	b	carmustine	halfpercDMSO	2	B	3	QX158	q10.norm.EXT	0.014801866472185
1386	20140512	RIAILs	1	e	carmustine	halfpercDMSO	2	B	3	QX506	q10.norm.EXT	0.0248772475076429
1387	20140513	RIAILs	1	f	carmustine	halfpercDMSO	2	B	3	QX37	q10.norm.EXT	-0.063302326410711
1388	20140520	RIAILs	1	h	carmustine	halfpercDMSO	2	B	3	QX529	q10.norm.EXT	-0.0151152860868248
1389	20140526	RIAILs	1	i	carmustine	halfpercDMSO	2	B	3	CB4856	q10.norm.EXT	-0.00309168802328769
1390	20140603	RIAILs	1	k	carmustine	halfpercDMSO	2	B	3	QX553	q10.norm.EXT	-0.00167352313472016
1391	20140623	RIAILs	1	l	carmustine	halfpercDMSO	2	B	3	QX245	q10.norm.EXT	0.101988739489135
1392	20140624	RIAILs	1	m	carmustine	halfpercDMSO	2	B	3	QX487	q10.norm.EXT	-0.0183907720130919
1393	20140429	RIAILs	1	b	carmustine	halfpercDMSO	2	B	3	QX158	q10.TOF	-0.141023667631469
1394	20140512	RIAILs	1	e	carmustine	halfpercDMSO	2	B	3	QX506	q10.TOF	0.576127958037047
1395	20140513	RIAILs	1	f	carmustine	halfpercDMSO	2	B	3	QX37	q10.TOF	1.03317553527692
1396	20140520	RIAILs	1	h	carmustine	halfpercDMSO	2	B	3	QX529	q10.TOF	-1.15429291183629
1397	20140526	RIAILs	1	i	carmustine	halfpercDMSO	2	B	3	CB4856	q10.TOF	0.498975205353339
1398	20140603	RIAILs	1	k	carmustine	halfpercDMSO	2	B	3	QX553	q10.TOF	-2.65931857756688
1399	20140623	RIAILs	1	l	carmustine	halfpercDMSO	2	B	3	QX245	q10.TOF	14.5004798286838
1400	20140624	RIAILs	1	m	carmustine	halfpercDMSO	2	B	3	QX487	q10.TOF	-3.61602869598102
1401	20140429	RIAILs	1	b	carmustine	halfpercDMSO	2	B	3	QX158	q25.EXT	-3.93778607384539
1402	20140512	RIAILs	1	e	carmustine	halfpercDMSO	2	B	3	QX506	q25.EXT	-5.26385917619566
1403	20140513	RIAILs	1	f	carmustine	halfpercDMSO	2	B	3	QX37	q25.EXT	-5.09419105092233
1404	20140520	RIAILs	1	h	carmustine	halfpercDMSO	2	B	3	QX529	q25.EXT	1.72395651076579
1405	20140526	RIAILs	1	i	carmustine	halfpercDMSO	2	B	3	CB4856	q25.EXT	-0.653619190295208
1406	20140603	RIAILs	1	k	carmustine	halfpercDMSO	2	B	3	QX553	q25.EXT	29.4206226010514
1407	20140623	RIAILs	1	l	carmustine	halfpercDMSO	2	B	3	QX245	q25.EXT	82.8993848512813
1408	20140624	RIAILs	1	m	carmustine	halfpercDMSO	2	B	3	QX487	q25.EXT	-31.5330493500587
1409	20140429	RIAILs	1	b	carmustine	halfpercDMSO	2	B	3	QX158	q25.norm.EXT	-0.045977549195839
1410	20140512	RIAILs	1	e	carmustine	halfpercDMSO	2	B	3	QX506	q25.norm.EXT	0.117972399969754
1411	20140513	RIAILs	1	f	carmustine	halfpercDMSO	2	B	3	QX37	q25.norm.EXT	-0.101895895204241
1412	20140520	RIAILs	1	h	carmustine	halfpercDMSO	2	B	3	QX529	q25.norm.EXT	-0.0284676061576437
1413	20140526	RIAILs	1	i	carmustine	halfpercDMSO	2	B	3	CB4856	q25.norm.EXT	0.0252300453351817
1414	20140603	RIAILs	1	k	carmustine	halfpercDMSO	2	B	3	QX553	q25.norm.EXT	0.0701570897087133
1415	20140623	RIAILs	1	l	carmustine	halfpercDMSO	2	B	3	QX245	q25.norm.EXT	0.244418724946152
1416	20140624	RIAILs	1	m	carmustine	halfpercDMSO	2	B	3	QX487	q25.norm.EXT	-0.0793016909351665
1417	20140429	RIAILs	1	b	carmustine	halfpercDMSO	2	B	3	QX158	q25.TOF	-0.029859766267317
1418	20140512	RIAILs	1	e	carmustine	halfpercDMSO	2	B	3	QX506	q25.TOF	7.60325720219717
1419	20140513	RIAILs	1	f	carmustine	halfpercDMSO	2	B	3	QX37	q25.TOF	-5.3620393833194
1420	20140520	RIAILs	1	h	carmustine	halfpercDMSO	2	B	3	QX529	q25.TOF	6.55423702273143
1421	20140526	RIAILs	1	i	carmustine	halfpercDMSO	2	B	3	CB4856	q25.TOF	-0.395496395952169
1422	20140603	RIAILs	1	k	carmustine	halfpercDMSO	2	B	3	QX553	q25.TOF	4.65923222279382
1423	20140623	RIAILs	1	l	carmustine	halfpercDMSO	2	B	3	QX245	q25.TOF	30.451455933278
1424	20140624	RIAILs	1	m	carmustine	halfpercDMSO	2	B	3	QX487	q25.TOF	-15.2135977896422
1425	20140429	RIAILs	1	b	carmustine	halfpercDMSO	2	B	3	QX158	q75.EXT	-329.333412897503
1426	20140512	RIAILs	1	e	carmustine	halfpercDMSO	2	B	3	QX506	q75.EXT	319.086252943242
1427	20140513	RIAILs	1	f	carmustine	halfpercDMSO	2	B	3	QX37	q75.EXT	87.8320330019119
1428	20140520	RIAILs	1	h	carmustine	halfpercDMSO	2	B	3	QX529	q75.EXT	57.554434902041
1429	20140526	RIAILs	1	i	carmustine	halfpercDMSO	2	B	3	CB4856	q75.EXT	170.817571909862
1430	20140603	RIAILs	1	k	carmustine	halfpercDMSO	2	B	3	QX553	q75.EXT	-196.308727101642
1431	20140623	RIAILs	1	l	carmustine	halfpercDMSO	2	B	3	QX245	q75.EXT	33.1494283914057
1432	20140624	RIAILs	1	m	carmustine	halfpercDMSO	2	B	3	QX487	q75.EXT	169.133793133547
1433	20140429	RIAILs	1	b	carmustine	halfpercDMSO	2	B	3	QX158	q75.norm.EXT	-0.330486024668411
1434	20140512	RIAILs	1	e	carmustine	halfpercDMSO	2	B	3	QX506	q75.norm.EXT	0.36509296846112
1435	20140513	RIAILs	1	f	carmustine	halfpercDMSO	2	B	3	QX37	q75.norm.EXT	0.051155375581856
1436	20140520	RIAILs	1	h	carmustine	halfpercDMSO	2	B	3	QX529	q75.norm.EXT	-0.0921398544892147
1437	20140526	RIAILs	1	i	carmustine	halfpercDMSO	2	B	3	CB4856	q75.norm.EXT	0.270227604350597
1438	20140603	RIAILs	1	k	carmustine	halfpercDMSO	2	B	3	QX553	q75.norm.EXT	0.0990557857331878
1439	20140623	RIAILs	1	l	carmustine	halfpercDMSO	2	B	3	QX245	q75.norm.EXT	0.194754396550062
1440	20140624	RIAILs	1	m	carmustine	halfpercDMSO	2	B	3	QX487	q75.norm.EXT	0.240316029157688
1441	20140429	RIAILs	1	b	carmustine	halfpercDMSO	2	B	3	QX158	q75.TOF	-34.9471481919822
1442	20140512	RIAILs	1	e	carmustine	halfpercDMSO	2	B	3	QX506	q75.TOF	68.3069001442311
1443	20140513	RIAILs	1	f	carmustine	halfpercDMSO	2	B	3	QX37	q75.TOF	29.9597926277182
1444	20140520	RIAILs	1	h	carmustine	halfpercDMSO	2	B	3	QX529	q75.TOF	38.6518777985681
1445	20140526	RIAILs	1	i	carmustine	halfpercDMSO	2	B	3	CB4856	q75.TOF	27.5122597510205
1446	20140603	RIAILs	1	k	carmustine	halfpercDMSO	2	B	3	QX553	q75.TOF	-76.5422379009092
1447	20140623	RIAILs	1	l	carmustine	halfpercDMSO	2	B	3	QX245	q75.TOF	15.1887187411734
1448	20140624	RIAILs	1	m	carmustine	halfpercDMSO	2	B	3	QX487	q75.TOF	65.4176035016377
1449	20140429	RIAILs	1	b	carmustine	halfpercDMSO	2	B	3	QX158	q90.EXT	40.7278733464283
1450	20140512	RIAILs	1	e	carmustine	halfpercDMSO	2	B	3	QX506	q90.EXT	345.740542234808
1451	20140513	RIAILs	1	f	carmustine	halfpercDMSO	2	B	3	QX37	q90.EXT	393.908160674558
1452	20140520	RIAILs	1	h	carmustine	halfpercDMSO	2	B	3	QX529	q90.EXT	201.937557294549
1453	20140526	RIAILs	1	i	carmustine	halfpercDMSO	2	B	3	CB4856	q90.EXT	389.119448827232
1454	20140603	RIAILs	1	k	carmustine	halfpercDMSO	2	B	3	QX553	q90.EXT	-411.460031060645
1455	20140623	RIAILs	1	l	carmustine	halfpercDMSO	2	B	3	QX245	q90.EXT	24.8487295034338
1456	20140624	RIAILs	1	m	carmustine	halfpercDMSO	2	B	3	QX487	q90.EXT	471.575698351255
1457	20140429	RIAILs	1	b	carmustine	halfpercDMSO	2	B	3	QX158	q90.norm.EXT	-0.197558791208525
1458	20140512	RIAILs	1	e	carmustine	halfpercDMSO	2	B	3	QX506	q90.norm.EXT	0.349360629676261
1459	20140513	RIAILs	1	f	carmustine	halfpercDMSO	2	B	3	QX37	q90.norm.EXT	0.384349995159544
1460	20140520	RIAILs	1	h	carmustine	halfpercDMSO	2	B	3	QX529	q90.norm.EXT	-0.00739746094732966
1461	20140526	RIAILs	1	i	carmustine	halfpercDMSO	2	B	3	CB4856	q90.norm.EXT	0.219817694297233
1462	20140603	RIAILs	1	k	carmustine	halfpercDMSO	2	B	3	QX553	q90.norm.EXT	0.400842881891228
1463	20140623	RIAILs	1	l	carmustine	halfpercDMSO	2	B	3	QX245	q90.norm.EXT	0.139596029908799
1464	20140624	RIAILs	1	m	carmustine	halfpercDMSO	2	B	3	QX487	q90.norm.EXT	0.01017701097955
1465	20140429	RIAILs	1	b	carmustine	halfpercDMSO	2	B	3	QX158	q90.TOF	-19.7582587780218
1466	20140512	RIAILs	1	e	carmustine	halfpercDMSO	2	B	3	QX506	q90.TOF	54.6387317757624
1467	20140513	RIAILs	1	f	carmustine	halfpercDMSO	2	B	3	QX37	q90.TOF	50.5215210685998
1468	20140520	RIAILs	1	h	carmustine	halfpercDMSO	2	B	3	QX529	q90.TOF	38.7528430023198
1469	20140526	RIAILs	1	i	carmustine	halfpercDMSO	2	B	3	CB4856	q90.TOF	80.8081847090633
1470	20140603	RIAILs	1	k	carmustine	halfpercDMSO	2	B	3	QX553	q90.TOF	-81.8876896349041
1471	20140623	RIAILs	1	l	carmustine	halfpercDMSO	2	B	3	QX245	q90.TOF	-38.6901540856374
1472	20140624	RIAILs	1	m	carmustine	halfpercDMSO	2	B	3	QX487	q90.TOF	57.1284142437669
1473	20140429	RIAILs	1	b	carmustine	halfpercDMSO	2	B	3	QX158	var.EXT	-42607.1070416778
1474	20140512	RIAILs	1	e	carmustine	halfpercDMSO	2	B	3	QX506	var.EXT	343960.793515033
1475	20140513	RIAILs	1	f	carmustine	halfpercDMSO	2	B	3	QX37	var.EXT	376665.855037308
1476	20140520	RIAILs	1	h	carmustine	halfpercDMSO	2	B	3	QX529	var.EXT	-10443.1865169014
1477	20140526	RIAILs	1	i	carmustine	halfpercDMSO	2	B	3	CB4856	var.EXT	65419.3843567354
1478	20140603	RIAILs	1	k	carmustine	halfpercDMSO	2	B	3	QX553	var.EXT	227644.617122852
1479	20140623	RIAILs	1	l	carmustine	halfpercDMSO	2	B	3	QX245	var.EXT	-16186.7416188006
1480	20140624	RIAILs	1	m	carmustine	halfpercDMSO	2	B	3	QX487	var.EXT	102997.713825105
1481	20140429	RIAILs	1	b	carmustine	halfpercDMSO	2	B	3	QX158	var.TOF	-3174.27541287302
1482	20140512	RIAILs	1	e	carmustine	halfpercDMSO	2	B	3	QX506	var.TOF	9425.80883605821
1483	20140513	RIAILs	1	f	carmustine	halfpercDMSO	2	B	3	QX37	var.TOF	4302.82548384602
1484	20140520	RIAILs	1	h	carmustine	halfpercDMSO	2	B	3	QX529	var.TOF	1362.39952979849
1485	20140526	RIAILs	1	i	carmustine	halfpercDMSO	2	B	3	CB4856	var.TOF	6514.4940595075
1486	20140603	RIAILs	1	k	carmustine	halfpercDMSO	2	B	3	QX553	var.TOF	-913.156336049245
1487	20140623	RIAILs	1	l	carmustine	halfpercDMSO	2	B	3	QX245	var.TOF	-7295.00067657491
1488	20140624	RIAILs	1	m	carmustine	halfpercDMSO	2	B	3	QX487	var.TOF	4734.7430488052
1489	20140429	RIAILs	1	b	carmustine	halfpercDMSO	2	B	5	QX404	cv.EXT	0.0184292259277497
1490	20140512	RIAILs	1	e	carmustine	halfpercDMSO	2	B	5	N2	cv.EXT	-0.0321015067590097
1491	20140513	RIAILs	1	f	carmustine	halfpercDMSO	2	B	5	QX306	cv.EXT	0.0449188618020958
1492	20140520	RIAILs	1	h	carmustine	halfpercDMSO	2	B	5	QX491	cv.EXT	0.232708785387652
1493	20140526	RIAILs	1	i	carmustine	halfpercDMSO	2	B	5	QX279	cv.EXT	0.151783965192134
1494	20140603	RIAILs	1	k	carmustine	halfpercDMSO	2	B	5	QX315	cv.EXT	-0.0310645043956737
1495	20140623	RIAILs	1	l	carmustine	halfpercDMSO	2	B	5	QX521	cv.EXT	0.14409521211377
1496	20140624	RIAILs	1	m	carmustine	halfpercDMSO	2	B	5	QX492	cv.EXT	-0.117058137567325
1497	20140429	RIAILs	1	b	carmustine	halfpercDMSO	2	B	5	QX404	cv.TOF	0.0229991569727366
1498	20140512	RIAILs	1	e	carmustine	halfpercDMSO	2	B	5	N2	cv.TOF	-0.00208888274966077
1499	20140513	RIAILs	1	f	carmustine	halfpercDMSO	2	B	5	QX306	cv.TOF	0.0134039735433351
1500	20140520	RIAILs	1	h	carmustine	halfpercDMSO	2	B	5	QX491	cv.TOF	0.189969176465078
1501	20140526	RIAILs	1	i	carmustine	halfpercDMSO	2	B	5	QX279	cv.TOF	-0.00673266127885896
1502	20140603	RIAILs	1	k	carmustine	halfpercDMSO	2	B	5	QX315	cv.TOF	-0.0228901656834381
1503	20140623	RIAILs	1	l	carmustine	halfpercDMSO	2	B	5	QX521	cv.TOF	0.0596102861686297
1504	20140624	RIAILs	1	m	carmustine	halfpercDMSO	2	B	5	QX492	cv.TOF	-0.0585744583486016
1505	20140429	RIAILs	1	b	carmustine	halfpercDMSO	2	B	5	QX404	mean.EXT	-33.7054138457969
1506	20140512	RIAILs	1	e	carmustine	halfpercDMSO	2	B	5	N2	mean.EXT	-0.586278026188648
1507	20140513	RIAILs	1	f	carmustine	halfpercDMSO	2	B	5	QX306	mean.EXT	114.843631314033
1508	20140520	RIAILs	1	h	carmustine	halfpercDMSO	2	B	5	QX491	mean.EXT	-18.3221372603931
1509	20140526	RIAILs	1	i	carmustine	halfpercDMSO	2	B	5	QX279	mean.EXT	-110.959898218294
1510	20140603	RIAILs	1	k	carmustine	halfpercDMSO	2	B	5	QX315	mean.EXT	-67.2767925173109
1511	20140623	RIAILs	1	l	carmustine	halfpercDMSO	2	B	5	QX521	mean.EXT	37.3364018359573
1512	20140624	RIAILs	1	m	carmustine	halfpercDMSO	2	B	5	QX492	mean.EXT	-9.92600149652897
1513	20140429	RIAILs	1	b	carmustine	halfpercDMSO	2	B	5	QX404	mean.norm.EXT	0.0435931785607079
1514	20140512	RIAILs	1	e	carmustine	halfpercDMSO	2	B	5	N2	mean.norm.EXT	0.0643792324679922
1515	20140513	RIAILs	1	f	carmustine	halfpercDMSO	2	B	5	QX306	mean.norm.EXT	0.146875686375486
1516	20140520	RIAILs	1	h	carmustine	halfpercDMSO	2	B	5	QX491	mean.norm.EXT	0.0353210881462373
1517	20140526	RIAILs	1	i	carmustine	halfpercDMSO	2	B	5	QX279	mean.norm.EXT	-0.0862187741482913
1518	20140603	RIAILs	1	k	carmustine	halfpercDMSO	2	B	5	QX315	mean.norm.EXT	-0.141108374822847
1519	20140623	RIAILs	1	l	carmustine	halfpercDMSO	2	B	5	QX521	mean.norm.EXT	0.102886882270163
1520	20140624	RIAILs	1	m	carmustine	halfpercDMSO	2	B	5	QX492	mean.norm.EXT	-0.014423449343699
1521	20140429	RIAILs	1	b	carmustine	halfpercDMSO	2	B	5	QX404	mean.TOF	-16.9504735087292
1522	20140512	RIAILs	1	e	carmustine	halfpercDMSO	2	B	5	N2	mean.TOF	-2.76473068945485
1523	20140513	RIAILs	1	f	carmustine	halfpercDMSO	2	B	5	QX306	mean.TOF	15.0861138545133
1524	20140520	RIAILs	1	h	carmustine	halfpercDMSO	2	B	5	QX491	mean.TOF	-22.7755756705723
1525	20140526	RIAILs	1	i	carmustine	halfpercDMSO	2	B	5	QX279	mean.TOF	-33.647557645356
1526	20140603	RIAILs	1	k	carmustine	halfpercDMSO	2	B	5	QX315	mean.TOF	-10.5954622052727
1527	20140623	RIAILs	1	l	carmustine	halfpercDMSO	2	B	5	QX521	mean.TOF	-14.8560741646245
1528	20140624	RIAILs	1	m	carmustine	halfpercDMSO	2	B	5	QX492	mean.TOF	-0.127996724113441
1529	20140429	RIAILs	1	b	carmustine	halfpercDMSO	2	B	5	QX404	median.EXT	-36.63866821029
1530	20140512	RIAILs	1	e	carmustine	halfpercDMSO	2	B	5	N2	median.EXT	-25.0777974953055
1531	20140513	RIAILs	1	f	carmustine	halfpercDMSO	2	B	5	QX306	median.EXT	72.3888647392065
1532	20140520	RIAILs	1	h	carmustine	halfpercDMSO	2	B	5	QX491	median.EXT	-134.245110384213
1533	20140526	RIAILs	1	i	carmustine	halfpercDMSO	2	B	5	QX279	median.EXT	-81.3062382191469
1534	20140603	RIAILs	1	k	carmustine	halfpercDMSO	2	B	5	QX315	median.EXT	-51.1273094455689
1535	20140623	RIAILs	1	l	carmustine	halfpercDMSO	2	B	5	QX521	median.EXT	-80.7625028271104
1536	20140624	RIAILs	1	m	carmustine	halfpercDMSO	2	B	5	QX492	median.EXT	28.7371497674288
1537	20140429	RIAILs	1	b	carmustine	halfpercDMSO	2	B	5	QX404	median.norm.EXT	-0.0045663931724531
1538	20140512	RIAILs	1	e	carmustine	halfpercDMSO	2	B	5	N2	median.norm.EXT	0.0981032504738947
1539	20140513	RIAILs	1	f	carmustine	halfpercDMSO	2	B	5	QX306	median.norm.EXT	0.273247176331041
1540	20140520	RIAILs	1	h	carmustine	halfpercDMSO	2	B	5	QX491	median.norm.EXT	-0.200574735612838
1541	20140526	RIAILs	1	i	carmustine	halfpercDMSO	2	B	5	QX279	median.norm.EXT	-0.208710820424329
1542	20140603	RIAILs	1	k	carmustine	halfpercDMSO	2	B	5	QX315	median.norm.EXT	-0.0700070640608036
1543	20140623	RIAILs	1	l	carmustine	halfpercDMSO	2	B	5	QX521	median.norm.EXT	-0.0816948294649574
1544	20140624	RIAILs	1	m	carmustine	halfpercDMSO	2	B	5	QX492	median.norm.EXT	-0.0209124517039646
1545	20140429	RIAILs	1	b	carmustine	halfpercDMSO	2	B	5	QX404	median.TOF	-30.9478254091981
1546	20140512	RIAILs	1	e	carmustine	halfpercDMSO	2	B	5	N2	median.TOF	-6.94387599878476
1547	20140513	RIAILs	1	f	carmustine	halfpercDMSO	2	B	5	QX306	median.TOF	13.5483299889964
1548	20140520	RIAILs	1	h	carmustine	halfpercDMSO	2	B	5	QX491	median.TOF	-53.1747758976017
1549	20140526	RIAILs	1	i	carmustine	halfpercDMSO	2	B	5	QX279	median.TOF	-17.1591159696843
1550	20140603	RIAILs	1	k	carmustine	halfpercDMSO	2	B	5	QX315	median.TOF	7.89763409506777
1551	20140623	RIAILs	1	l	carmustine	halfpercDMSO	2	B	5	QX521	median.TOF	-31.579917646503
1552	20140624	RIAILs	1	m	carmustine	halfpercDMSO	2	B	5	QX492	median.TOF	3.73824203737245
1553	20140429	RIAILs	1	b	carmustine	halfpercDMSO	2	B	5	QX404	n	35.2166487106914
1554	20140512	RIAILs	1	e	carmustine	halfpercDMSO	2	B	5	N2	n	-110.128934301083
1555	20140513	RIAILs	1	f	carmustine	halfpercDMSO	2	B	5	QX306	n	-20.8427378983041
1556	20140520	RIAILs	1	h	carmustine	halfpercDMSO	2	B	5	QX491	n	-61.8708764779875
1557	20140526	RIAILs	1	i	carmustine	halfpercDMSO	2	B	5	QX279	n	-17.5377626902771
1558	20140603	RIAILs	1	k	carmustine	halfpercDMSO	2	B	5	QX315	n	16.2429197554235
1559	20140623	RIAILs	1	l	carmustine	halfpercDMSO	2	B	5	QX521	n	-37.2269258061596
1560	20140624	RIAILs	1	m	carmustine	halfpercDMSO	2	B	5	QX492	n	37.1311277228392
1561	20140429	RIAILs	1	b	carmustine	halfpercDMSO	2	B	5	QX404	norm.n	12.284290854364
1562	20140512	RIAILs	1	e	carmustine	halfpercDMSO	2	B	5	N2	norm.n	-36.6762023520356
1563	20140513	RIAILs	1	f	carmustine	halfpercDMSO	2	B	5	QX306	norm.n	-6.14256207050572
1564	20140520	RIAILs	1	h	carmustine	halfpercDMSO	2	B	5	QX491	norm.n	-20.3861841687386
1565	20140526	RIAILs	1	i	carmustine	halfpercDMSO	2	B	5	QX279	norm.n	-4.74768881533148
1566	20140603	RIAILs	1	k	carmustine	halfpercDMSO	2	B	5	QX315	norm.n	5.36842174442494
1567	20140623	RIAILs	1	l	carmustine	halfpercDMSO	2	B	5	QX521	norm.n	-12.4580031979924
1568	20140624	RIAILs	1	m	carmustine	halfpercDMSO	2	B	5	QX492	norm.n	11.4881119276412
1569	20140429	RIAILs	1	b	carmustine	halfpercDMSO	2	B	5	QX404	q10.EXT	7.36271068891546
1570	20140512	RIAILs	1	e	carmustine	halfpercDMSO	2	B	5	N2	q10.EXT	-8.65944392624735
1571	20140513	RIAILs	1	f	carmustine	halfpercDMSO	2	B	5	QX306	q10.EXT	-15.4242398614895
1572	20140520	RIAILs	1	h	carmustine	halfpercDMSO	2	B	5	QX491	q10.EXT	8.62420504038894
1573	20140526	RIAILs	1	i	carmustine	halfpercDMSO	2	B	5	QX279	q10.EXT	-3.06488887696765
1574	20140603	RIAILs	1	k	carmustine	halfpercDMSO	2	B	5	QX315	q10.EXT	-10.6109363712656
1575	20140623	RIAILs	1	l	carmustine	halfpercDMSO	2	B	5	QX521	q10.EXT	2.24000582196889
1576	20140624	RIAILs	1	m	carmustine	halfpercDMSO	2	B	5	QX492	q10.EXT	-2.3907982632623
1577	20140429	RIAILs	1	b	carmustine	halfpercDMSO	2	B	5	QX404	q10.norm.EXT	0.0443165629034419
1578	20140512	RIAILs	1	e	carmustine	halfpercDMSO	2	B	5	N2	q10.norm.EXT	0.0246869163682451
1579	20140513	RIAILs	1	f	carmustine	halfpercDMSO	2	B	5	QX306	q10.norm.EXT	0.023950006356541
1580	20140520	RIAILs	1	h	carmustine	halfpercDMSO	2	B	5	QX491	q10.norm.EXT	0.107505710791152
1581	20140526	RIAILs	1	i	carmustine	halfpercDMSO	2	B	5	QX279	q10.norm.EXT	-0.0394491015290247
1582	20140603	RIAILs	1	k	carmustine	halfpercDMSO	2	B	5	QX315	q10.norm.EXT	-0.11055770633189
1583	20140623	RIAILs	1	l	carmustine	halfpercDMSO	2	B	5	QX521	q10.norm.EXT	0.0452470326827063
1584	20140624	RIAILs	1	m	carmustine	halfpercDMSO	2	B	5	QX492	q10.norm.EXT	-0.0728374504368384
1585	20140429	RIAILs	1	b	carmustine	halfpercDMSO	2	B	5	QX404	q10.TOF	-0.186927811366387
1586	20140512	RIAILs	1	e	carmustine	halfpercDMSO	2	B	5	N2	q10.TOF	-5.38561858885052
1587	20140513	RIAILs	1	f	carmustine	halfpercDMSO	2	B	5	QX306	q10.TOF	-2.60561893974318
1588	20140520	RIAILs	1	h	carmustine	halfpercDMSO	2	B	5	QX491	q10.TOF	-2.26905327117359
1589	20140526	RIAILs	1	i	carmustine	halfpercDMSO	2	B	5	QX279	q10.TOF	-3.58476707707389
1590	20140603	RIAILs	1	k	carmustine	halfpercDMSO	2	B	5	QX315	q10.TOF	2.9716994993432
1591	20140623	RIAILs	1	l	carmustine	halfpercDMSO	2	B	5	QX521	q10.TOF	-5.49091314436591
1592	20140624	RIAILs	1	m	carmustine	halfpercDMSO	2	B	5	QX492	q10.TOF	5.10459538881068
1593	20140429	RIAILs	1	b	carmustine	halfpercDMSO	2	B	5	QX404	q25.EXT	-35.6768406009399
1594	20140512	RIAILs	1	e	carmustine	halfpercDMSO	2	B	5	N2	q25.EXT	13.7143833593699
1595	20140513	RIAILs	1	f	carmustine	halfpercDMSO	2	B	5	QX306	q25.EXT	-43.9061264098033
1596	20140520	RIAILs	1	h	carmustine	halfpercDMSO	2	B	5	QX491	q25.EXT	-29.2414718126175
1597	20140526	RIAILs	1	i	carmustine	halfpercDMSO	2	B	5	QX279	q25.EXT	-32.3737193618699
1598	20140603	RIAILs	1	k	carmustine	halfpercDMSO	2	B	5	QX315	q25.EXT	17.4821575158016
1599	20140623	RIAILs	1	l	carmustine	halfpercDMSO	2	B	5	QX521	q25.EXT	-19.5892692316824
1600	20140624	RIAILs	1	m	carmustine	halfpercDMSO	2	B	5	QX492	q25.EXT	-14.5281105391134
1601	20140429	RIAILs	1	b	carmustine	halfpercDMSO	2	B	5	QX404	q25.norm.EXT	0.0862295765049342
1602	20140512	RIAILs	1	e	carmustine	halfpercDMSO	2	B	5	N2	q25.norm.EXT	0.0962915586429584
1603	20140513	RIAILs	1	f	carmustine	halfpercDMSO	2	B	5	QX306	q25.norm.EXT	-0.0598530546338657
1604	20140520	RIAILs	1	h	carmustine	halfpercDMSO	2	B	5	QX491	q25.norm.EXT	0.0658993089690607
1605	20140526	RIAILs	1	i	carmustine	halfpercDMSO	2	B	5	QX279	q25.norm.EXT	0.0087385093853547
1606	20140603	RIAILs	1	k	carmustine	halfpercDMSO	2	B	5	QX315	q25.norm.EXT	-0.0973544181594384
1607	20140623	RIAILs	1	l	carmustine	halfpercDMSO	2	B	5	QX521	q25.norm.EXT	-0.000239069884848774
1608	20140624	RIAILs	1	m	carmustine	halfpercDMSO	2	B	5	QX492	q25.norm.EXT	-0.0899536798260113
1609	20140429	RIAILs	1	b	carmustine	halfpercDMSO	2	B	5	QX404	q25.TOF	-17.9841727973693
1610	20140512	RIAILs	1	e	carmustine	halfpercDMSO	2	B	5	N2	q25.TOF	-6.24325096448022
1611	20140513	RIAILs	1	f	carmustine	halfpercDMSO	2	B	5	QX306	q25.TOF	-10.0545415966819
1612	20140520	RIAILs	1	h	carmustine	halfpercDMSO	2	B	5	QX491	q25.TOF	-20.6916569883718
1613	20140526	RIAILs	1	i	carmustine	halfpercDMSO	2	B	5	QX279	q25.TOF	-9.4057648537148
1614	20140603	RIAILs	1	k	carmustine	halfpercDMSO	2	B	5	QX315	q25.TOF	-6.73091340385398
1615	20140623	RIAILs	1	l	carmustine	halfpercDMSO	2	B	5	QX521	q25.TOF	-9.77133753338012
1616	20140624	RIAILs	1	m	carmustine	halfpercDMSO	2	B	5	QX492	q25.TOF	5.78640221035785
1617	20140429	RIAILs	1	b	carmustine	halfpercDMSO	2	B	5	QX404	q75.EXT	-63.1755289722388
1618	20140512	RIAILs	1	e	carmustine	halfpercDMSO	2	B	5	N2	q75.EXT	-11.8998759664744
1619	20140513	RIAILs	1	f	carmustine	halfpercDMSO	2	B	5	QX306	q75.EXT	243.146475369404
1620	20140520	RIAILs	1	h	carmustine	halfpercDMSO	2	B	5	QX491	q75.EXT	-186.024806943654
1621	20140526	RIAILs	1	i	carmustine	halfpercDMSO	2	B	5	QX279	q75.EXT	-265.765120590072
1622	20140603	RIAILs	1	k	carmustine	halfpercDMSO	2	B	5	QX315	q75.EXT	-173.28875164208
1623	20140623	RIAILs	1	l	carmustine	halfpercDMSO	2	B	5	QX521	q75.EXT	17.7077636406545
1624	20140624	RIAILs	1	m	carmustine	halfpercDMSO	2	B	5	QX492	q75.EXT	4.24502200428465
1625	20140429	RIAILs	1	b	carmustine	halfpercDMSO	2	B	5	QX404	q75.norm.EXT	-0.034917100297292
1626	20140512	RIAILs	1	e	carmustine	halfpercDMSO	2	B	5	N2	q75.norm.EXT	-0.0211109359586523
1627	20140513	RIAILs	1	f	carmustine	halfpercDMSO	2	B	5	QX306	q75.norm.EXT	0.351252660475136
1628	20140520	RIAILs	1	h	carmustine	halfpercDMSO	2	B	5	QX491	q75.norm.EXT	0.248604361960829
1629	20140526	RIAILs	1	i	carmustine	halfpercDMSO	2	B	5	QX279	q75.norm.EXT	-0.22496685118716
1630	20140603	RIAILs	1	k	carmustine	halfpercDMSO	2	B	5	QX315	q75.norm.EXT	-0.0562313267022118
1631	20140623	RIAILs	1	l	carmustine	halfpercDMSO	2	B	5	QX521	q75.norm.EXT	0.17609287133323
1632	20140624	RIAILs	1	m	carmustine	halfpercDMSO	2	B	5	QX492	q75.norm.EXT	0.100041448470331
1633	20140429	RIAILs	1	b	carmustine	halfpercDMSO	2	B	5	QX404	q75.TOF	-7.45570352239675
1634	20140512	RIAILs	1	e	carmustine	halfpercDMSO	2	B	5	N2	q75.TOF	11.4402789260802
1635	20140513	RIAILs	1	f	carmustine	halfpercDMSO	2	B	5	QX306	q75.TOF	55.0638689812247
1636	20140520	RIAILs	1	h	carmustine	halfpercDMSO	2	B	5	QX491	q75.TOF	-44.1501603781851
1637	20140526	RIAILs	1	i	carmustine	halfpercDMSO	2	B	5	QX279	q75.TOF	-61.8769795164972
1638	20140603	RIAILs	1	k	carmustine	halfpercDMSO	2	B	5	QX315	q75.TOF	-10.9489409263885
1639	20140623	RIAILs	1	l	carmustine	halfpercDMSO	2	B	5	QX521	q75.TOF	-29.4564987110566
1640	20140624	RIAILs	1	m	carmustine	halfpercDMSO	2	B	5	QX492	q75.TOF	-17.8496248582361
1641	20140429	RIAILs	1	b	carmustine	halfpercDMSO	2	B	5	QX404	q90.EXT	-36.405591629261
1642	20140512	RIAILs	1	e	carmustine	halfpercDMSO	2	B	5	N2	q90.EXT	69.8273325726414
1643	20140513	RIAILs	1	f	carmustine	halfpercDMSO	2	B	5	QX306	q90.EXT	210.441762274589
1644	20140520	RIAILs	1	h	carmustine	halfpercDMSO	2	B	5	QX491	q90.EXT	-120.815535920338
1645	20140526	RIAILs	1	i	carmustine	halfpercDMSO	2	B	5	QX279	q90.EXT	-598.672771714696
1646	20140603	RIAILs	1	k	carmustine	halfpercDMSO	2	B	5	QX315	q90.EXT	-13.4942410525308
1647	20140623	RIAILs	1	l	carmustine	halfpercDMSO	2	B	5	QX521	q90.EXT	215.681058272357
1648	20140624	RIAILs	1	m	carmustine	halfpercDMSO	2	B	5	QX492	q90.EXT	101.85342892692
1649	20140429	RIAILs	1	b	carmustine	halfpercDMSO	2	B	5	QX404	q90.norm.EXT	0.103198227495594
1650	20140512	RIAILs	1	e	carmustine	halfpercDMSO	2	B	5	N2	q90.norm.EXT	0.0919736594753871
1651	20140513	RIAILs	1	f	carmustine	halfpercDMSO	2	B	5	QX306	q90.norm.EXT	0.125894149532134
1652	20140520	RIAILs	1	h	carmustine	halfpercDMSO	2	B	5	QX491	q90.norm.EXT	0.176525834768163
1653	20140526	RIAILs	1	i	carmustine	halfpercDMSO	2	B	5	QX279	q90.norm.EXT	0.0574151482419336
1654	20140603	RIAILs	1	k	carmustine	halfpercDMSO	2	B	5	QX315	q90.norm.EXT	-0.141169392402504
1655	20140623	RIAILs	1	l	carmustine	halfpercDMSO	2	B	5	QX521	q90.norm.EXT	0.457218225914564
1656	20140624	RIAILs	1	m	carmustine	halfpercDMSO	2	B	5	QX492	q90.norm.EXT	-0.0722352759229992
1657	20140429	RIAILs	1	b	carmustine	halfpercDMSO	2	B	5	QX404	q90.TOF	-16.0580396994684
1658	20140512	RIAILs	1	e	carmustine	halfpercDMSO	2	B	5	N2	q90.TOF	9.10793967415523
1659	20140513	RIAILs	1	f	carmustine	halfpercDMSO	2	B	5	QX306	q90.TOF	-2.83276805726309
1660	20140520	RIAILs	1	h	carmustine	halfpercDMSO	2	B	5	QX491	q90.TOF	-50.9545224931375
1661	20140526	RIAILs	1	i	carmustine	halfpercDMSO	2	B	5	QX279	q90.TOF	-96.0300041849366
1662	20140603	RIAILs	1	k	carmustine	halfpercDMSO	2	B	5	QX315	q90.TOF	-1.54923471694852
1663	20140623	RIAILs	1	l	carmustine	halfpercDMSO	2	B	5	QX521	q90.TOF	7.49434032428346
1664	20140624	RIAILs	1	m	carmustine	halfpercDMSO	2	B	5	QX492	q90.TOF	20.4670882402744
1665	20140429	RIAILs	1	b	carmustine	halfpercDMSO	2	B	5	QX404	var.EXT	-51262.4273224853
1666	20140512	RIAILs	1	e	carmustine	halfpercDMSO	2	B	5	N2	var.EXT	-29656.3834256198
1667	20140513	RIAILs	1	f	carmustine	halfpercDMSO	2	B	5	QX306	var.EXT	330642.896099496
1668	20140520	RIAILs	1	h	carmustine	halfpercDMSO	2	B	5	QX491	var.EXT	348425.191883601
1669	20140526	RIAILs	1	i	carmustine	halfpercDMSO	2	B	5	QX279	var.EXT	-60248.0754297975
1670	20140603	RIAILs	1	k	carmustine	halfpercDMSO	2	B	5	QX315	var.EXT	-133489.597408593
1671	20140623	RIAILs	1	l	carmustine	halfpercDMSO	2	B	5	QX521	var.EXT	268629.313570835
1672	20140624	RIAILs	1	m	carmustine	halfpercDMSO	2	B	5	QX492	var.EXT	-91232.9128968889
1673	20140429	RIAILs	1	b	carmustine	halfpercDMSO	2	B	5	QX404	var.TOF	-3405.42921429835
1674	20140512	RIAILs	1	e	carmustine	halfpercDMSO	2	B	5	N2	var.TOF	413.248622657996
1675	20140513	RIAILs	1	f	carmustine	halfpercDMSO	2	B	5	QX306	var.TOF	7406.27314897403
1676	20140520	RIAILs	1	h	carmustine	halfpercDMSO	2	B	5	QX491	var.TOF	14261.1333985351
1677	20140526	RIAILs	1	i	carmustine	halfpercDMSO	2	B	5	QX279	var.TOF	-9657.54775105108
1678	20140603	RIAILs	1	k	carmustine	halfpercDMSO	2	B	5	QX315	var.TOF	-4484.76849520697
1679	20140623	RIAILs	1	l	carmustine	halfpercDMSO	2	B	5	QX521	var.TOF	4004.02862441681
1680	20140624	RIAILs	1	m	carmustine	halfpercDMSO	2	B	5	QX492	var.TOF	-3558.99324615189
1681	20140429	RIAILs	1	b	carmustine	halfpercDMSO	2	B	7	QX402	cv.EXT	-0.120940036282551
1682	20140512	RIAILs	1	e	carmustine	halfpercDMSO	2	B	7	QX192	cv.EXT	0.190345847977294
1683	20140513	RIAILs	1	f	carmustine	halfpercDMSO	2	B	7	QX91	cv.EXT	0.14109274578674
1684	20140520	RIAILs	1	h	carmustine	halfpercDMSO	2	B	7	QX456	cv.EXT	-0.115995299119642
1685	20140603	RIAILs	1	k	carmustine	halfpercDMSO	2	B	7	QX563	cv.EXT	0.0298179347231841
1686	20140623	RIAILs	1	l	carmustine	halfpercDMSO	2	B	7	QX15	cv.EXT	-0.0401766163102759
1687	20140624	RIAILs	1	m	carmustine	halfpercDMSO	2	B	7	QX49	cv.EXT	0.0434000621090641
1688	20140429	RIAILs	1	b	carmustine	halfpercDMSO	2	B	7	QX402	cv.TOF	-0.0825568027728112
1689	20140512	RIAILs	1	e	carmustine	halfpercDMSO	2	B	7	QX192	cv.TOF	-0.0444053287398405
1690	20140513	RIAILs	1	f	carmustine	halfpercDMSO	2	B	7	QX91	cv.TOF	0.0208128000156614
1691	20140520	RIAILs	1	h	carmustine	halfpercDMSO	2	B	7	QX456	cv.TOF	-0.0759594036415606
1692	20140603	RIAILs	1	k	carmustine	halfpercDMSO	2	B	7	QX563	cv.TOF	0.0929256045826568
1693	20140623	RIAILs	1	l	carmustine	halfpercDMSO	2	B	7	QX15	cv.TOF	-0.00450394602047053
1694	20140624	RIAILs	1	m	carmustine	halfpercDMSO	2	B	7	QX49	cv.TOF	-0.0194256769900474
1695	20140429	RIAILs	1	b	carmustine	halfpercDMSO	2	B	7	QX402	mean.EXT	25.8757855144251
1696	20140512	RIAILs	1	e	carmustine	halfpercDMSO	2	B	7	QX192	mean.EXT	-270.835425526103
1697	20140513	RIAILs	1	f	carmustine	halfpercDMSO	2	B	7	QX91	mean.EXT	-166.065670063243
1698	20140520	RIAILs	1	h	carmustine	halfpercDMSO	2	B	7	QX456	mean.EXT	45.8068491123578
1699	20140603	RIAILs	1	k	carmustine	halfpercDMSO	2	B	7	QX563	mean.EXT	69.1358409066512
1700	20140623	RIAILs	1	l	carmustine	halfpercDMSO	2	B	7	QX15	mean.EXT	-101.283172948813
1701	20140624	RIAILs	1	m	carmustine	halfpercDMSO	2	B	7	QX49	mean.EXT	19.4287766405569
1702	20140429	RIAILs	1	b	carmustine	halfpercDMSO	2	B	7	QX402	mean.norm.EXT	-0.0179303717014313
1703	20140512	RIAILs	1	e	carmustine	halfpercDMSO	2	B	7	QX192	mean.norm.EXT	-0.262012471796182
1704	20140513	RIAILs	1	f	carmustine	halfpercDMSO	2	B	7	QX91	mean.norm.EXT	-0.196546949677042
1705	20140520	RIAILs	1	h	carmustine	halfpercDMSO	2	B	7	QX456	mean.norm.EXT	0.230202410580869
1706	20140603	RIAILs	1	k	carmustine	halfpercDMSO	2	B	7	QX563	mean.norm.EXT	0.168514306661577
1707	20140623	RIAILs	1	l	carmustine	halfpercDMSO	2	B	7	QX15	mean.norm.EXT	0.0191975558050213
1708	20140624	RIAILs	1	m	carmustine	halfpercDMSO	2	B	7	QX49	mean.norm.EXT	-0.0441555899662356
1709	20140429	RIAILs	1	b	carmustine	halfpercDMSO	2	B	7	QX402	mean.TOF	27.755437381759
1710	20140512	RIAILs	1	e	carmustine	halfpercDMSO	2	B	7	QX192	mean.TOF	-49.36084646914
1711	20140513	RIAILs	1	f	carmustine	halfpercDMSO	2	B	7	QX91	mean.TOF	-41.1496762352395
1712	20140520	RIAILs	1	h	carmustine	halfpercDMSO	2	B	7	QX456	mean.TOF	3.92124339625125
1713	20140603	RIAILs	1	k	carmustine	halfpercDMSO	2	B	7	QX563	mean.TOF	-10.3246829372897
1714	20140623	RIAILs	1	l	carmustine	halfpercDMSO	2	B	7	QX15	mean.TOF	-30.8138684333676
1715	20140624	RIAILs	1	m	carmustine	halfpercDMSO	2	B	7	QX49	mean.TOF	6.99588204139886
1716	20140429	RIAILs	1	b	carmustine	halfpercDMSO	2	B	7	QX402	median.EXT	116.629535779349
1717	20140512	RIAILs	1	e	carmustine	halfpercDMSO	2	B	7	QX192	median.EXT	-53.7488033455138
1718	20140513	RIAILs	1	f	carmustine	halfpercDMSO	2	B	7	QX91	median.EXT	-153.209490444485
1719	20140520	RIAILs	1	h	carmustine	halfpercDMSO	2	B	7	QX456	median.EXT	145.840557832929
1720	20140603	RIAILs	1	k	carmustine	halfpercDMSO	2	B	7	QX563	median.EXT	-269.59583996725
1721	20140623	RIAILs	1	l	carmustine	halfpercDMSO	2	B	7	QX15	median.EXT	-117.079305886464
1722	20140624	RIAILs	1	m	carmustine	halfpercDMSO	2	B	7	QX49	median.EXT	11.3470348734091
1723	20140429	RIAILs	1	b	carmustine	halfpercDMSO	2	B	7	QX402	median.norm.EXT	0.0662835732968854
1724	20140512	RIAILs	1	e	carmustine	halfpercDMSO	2	B	7	QX192	median.norm.EXT	-0.135007921743008
1725	20140513	RIAILs	1	f	carmustine	halfpercDMSO	2	B	7	QX91	median.norm.EXT	-0.352078890517206
1726	20140520	RIAILs	1	h	carmustine	halfpercDMSO	2	B	7	QX456	median.norm.EXT	0.269291133419001
1727	20140603	RIAILs	1	k	carmustine	halfpercDMSO	2	B	7	QX563	median.norm.EXT	0.330574457858938
1728	20140623	RIAILs	1	l	carmustine	halfpercDMSO	2	B	7	QX15	median.norm.EXT	0.0272475402173034
1729	20140624	RIAILs	1	m	carmustine	halfpercDMSO	2	B	7	QX49	median.norm.EXT	-0.14423657633246
1730	20140429	RIAILs	1	b	carmustine	halfpercDMSO	2	B	7	QX402	median.TOF	43.4055050728097
1731	20140512	RIAILs	1	e	carmustine	halfpercDMSO	2	B	7	QX192	median.TOF	-33.1027679766096
1732	20140513	RIAILs	1	f	carmustine	halfpercDMSO	2	B	7	QX91	median.TOF	-41.6605726812989
1733	20140520	RIAILs	1	h	carmustine	halfpercDMSO	2	B	7	QX456	median.TOF	47.0635620691355
1734	20140603	RIAILs	1	k	carmustine	halfpercDMSO	2	B	7	QX563	median.TOF	-106.191792647398
1735	20140623	RIAILs	1	l	carmustine	halfpercDMSO	2	B	7	QX15	median.TOF	-38.0971304831123
1736	20140624	RIAILs	1	m	carmustine	halfpercDMSO	2	B	7	QX49	median.TOF	11.946023854528
1737	20140429	RIAILs	1	b	carmustine	halfpercDMSO	2	B	7	QX402	n	66.3168851816128
1738	20140512	RIAILs	1	e	carmustine	halfpercDMSO	2	B	7	QX192	n	-56.0631107386371
1739	20140513	RIAILs	1	f	carmustine	halfpercDMSO	2	B	7	QX91	n	-31.5884504120367
1740	20140520	RIAILs	1	h	carmustine	halfpercDMSO	2	B	7	QX456	n	-10.7706400070659
1741	20140603	RIAILs	1	k	carmustine	halfpercDMSO	2	B	7	QX563	n	22.1471866662601
1742	20140623	RIAILs	1	l	carmustine	halfpercDMSO	2	B	7	QX15	n	48.7454163580019
1743	20140624	RIAILs	1	m	carmustine	halfpercDMSO	2	B	7	QX49	n	-44.6085802818826
1744	20140429	RIAILs	1	b	carmustine	halfpercDMSO	2	B	7	QX402	norm.n	22.7442730369968
1745	20140512	RIAILs	1	e	carmustine	halfpercDMSO	2	B	7	QX192	norm.n	-18.6190529031159
1746	20140513	RIAILs	1	f	carmustine	halfpercDMSO	2	B	7	QX91	norm.n	-9.82617899701432
1747	20140520	RIAILs	1	h	carmustine	halfpercDMSO	2	B	7	QX456	norm.n	-3.25953531943907
1748	20140603	RIAILs	1	k	carmustine	halfpercDMSO	2	B	7	QX563	norm.n	7.36454692288564
1749	20140623	RIAILs	1	l	carmustine	halfpercDMSO	2	B	7	QX15	norm.n	16.3233251099348
1750	20140624	RIAILs	1	m	carmustine	halfpercDMSO	2	B	7	QX49	norm.n	-15.6984729618537
1751	20140429	RIAILs	1	b	carmustine	halfpercDMSO	2	B	7	QX402	q10.EXT	16.2801535395662
1752	20140512	RIAILs	1	e	carmustine	halfpercDMSO	2	B	7	QX192	q10.EXT	31.5979945390354
1753	20140513	RIAILs	1	f	carmustine	halfpercDMSO	2	B	7	QX91	q10.EXT	-11.7510704506421
1754	20140520	RIAILs	1	h	carmustine	halfpercDMSO	2	B	7	QX456	q10.EXT	13.6754512350845
1755	20140603	RIAILs	1	k	carmustine	halfpercDMSO	2	B	7	QX563	q10.EXT	-3.79674059238417
1756	20140623	RIAILs	1	l	carmustine	halfpercDMSO	2	B	7	QX15	q10.EXT	-6.77758796515738
1757	20140624	RIAILs	1	m	carmustine	halfpercDMSO	2	B	7	QX49	q10.EXT	10.0468558984542
1758	20140429	RIAILs	1	b	carmustine	halfpercDMSO	2	B	7	QX402	q10.norm.EXT	0.0135648841440246
1759	20140512	RIAILs	1	e	carmustine	halfpercDMSO	2	B	7	QX192	q10.norm.EXT	-0.0199173367928212
1760	20140513	RIAILs	1	f	carmustine	halfpercDMSO	2	B	7	QX91	q10.norm.EXT	-0.0688368551406427
1761	20140520	RIAILs	1	h	carmustine	halfpercDMSO	2	B	7	QX456	q10.norm.EXT	0.140852544357117
1762	20140603	RIAILs	1	k	carmustine	halfpercDMSO	2	B	7	QX563	q10.norm.EXT	0.103101063210588
1763	20140623	RIAILs	1	l	carmustine	halfpercDMSO	2	B	7	QX15	q10.norm.EXT	-0.026974438574123
1764	20140624	RIAILs	1	m	carmustine	halfpercDMSO	2	B	7	QX49	q10.norm.EXT	-0.0528577999127494
1765	20140429	RIAILs	1	b	carmustine	halfpercDMSO	2	B	7	QX402	q10.TOF	9.16770906680634
1766	20140512	RIAILs	1	e	carmustine	halfpercDMSO	2	B	7	QX192	q10.TOF	12.694424055753
1767	20140513	RIAILs	1	f	carmustine	halfpercDMSO	2	B	7	QX91	q10.TOF	-8.02503527323199
1768	20140520	RIAILs	1	h	carmustine	halfpercDMSO	2	B	7	QX456	q10.TOF	-2.77520660356059
1769	20140603	RIAILs	1	k	carmustine	halfpercDMSO	2	B	7	QX563	q10.TOF	-7.20247941980591
1770	20140623	RIAILs	1	l	carmustine	halfpercDMSO	2	B	7	QX15	q10.TOF	-3.28421879007123
1771	20140624	RIAILs	1	m	carmustine	halfpercDMSO	2	B	7	QX49	q10.TOF	7.14284884192311
1772	20140429	RIAILs	1	b	carmustine	halfpercDMSO	2	B	7	QX402	q25.EXT	89.0958512331327
1773	20140512	RIAILs	1	e	carmustine	halfpercDMSO	2	B	7	QX192	q25.EXT	39.5227147210745
1774	20140513	RIAILs	1	f	carmustine	halfpercDMSO	2	B	7	QX91	q25.EXT	-58.0861821683084
1775	20140520	RIAILs	1	h	carmustine	halfpercDMSO	2	B	7	QX456	q25.EXT	77.7757472850024
1776	20140603	RIAILs	1	k	carmustine	halfpercDMSO	2	B	7	QX563	q25.EXT	-44.3672861099878
1777	20140623	RIAILs	1	l	carmustine	halfpercDMSO	2	B	7	QX15	q25.EXT	-0.868368171846241
1778	20140624	RIAILs	1	m	carmustine	halfpercDMSO	2	B	7	QX49	q25.EXT	-11.5217034330223
1779	20140429	RIAILs	1	b	carmustine	halfpercDMSO	2	B	7	QX402	q25.norm.EXT	0.0424773158366718
1780	20140512	RIAILs	1	e	carmustine	halfpercDMSO	2	B	7	QX192	q25.norm.EXT	0.047345158944582
1781	20140513	RIAILs	1	f	carmustine	halfpercDMSO	2	B	7	QX91	q25.norm.EXT	-0.108272864189607
1782	20140520	RIAILs	1	h	carmustine	halfpercDMSO	2	B	7	QX456	q25.norm.EXT	0.143308718739904
1783	20140603	RIAILs	1	k	carmustine	halfpercDMSO	2	B	7	QX563	q25.norm.EXT	0.108366045313083
1784	20140623	RIAILs	1	l	carmustine	halfpercDMSO	2	B	7	QX15	q25.norm.EXT	0.0563309872976224
1785	20140624	RIAILs	1	m	carmustine	halfpercDMSO	2	B	7	QX49	q25.norm.EXT	-0.0968268335958998
1786	20140429	RIAILs	1	b	carmustine	halfpercDMSO	2	B	7	QX402	q25.TOF	42.7278380915338
1787	20140512	RIAILs	1	e	carmustine	halfpercDMSO	2	B	7	QX192	q25.TOF	6.76496101331329
1788	20140513	RIAILs	1	f	carmustine	halfpercDMSO	2	B	7	QX91	q25.TOF	-17.5011567699826
1789	20140520	RIAILs	1	h	carmustine	halfpercDMSO	2	B	7	QX456	q25.TOF	10.6409908516385
1790	20140603	RIAILs	1	k	carmustine	halfpercDMSO	2	B	7	QX563	q25.TOF	-18.7791640016719
1791	20140623	RIAILs	1	l	carmustine	halfpercDMSO	2	B	7	QX15	q25.TOF	-11.4648679867272
1792	20140624	RIAILs	1	m	carmustine	halfpercDMSO	2	B	7	QX49	q25.TOF	14.7309609036895
1793	20140429	RIAILs	1	b	carmustine	halfpercDMSO	2	B	7	QX402	q75.EXT	20.388713473212
1794	20140512	RIAILs	1	e	carmustine	halfpercDMSO	2	B	7	QX192	q75.EXT	-621.063798536659
1795	20140513	RIAILs	1	f	carmustine	halfpercDMSO	2	B	7	QX91	q75.EXT	-329.391287403123
1796	20140520	RIAILs	1	h	carmustine	halfpercDMSO	2	B	7	QX456	q75.EXT	59.0723536637239
1797	20140603	RIAILs	1	k	carmustine	halfpercDMSO	2	B	7	QX563	q75.EXT	293.572080133539
1798	20140623	RIAILs	1	l	carmustine	halfpercDMSO	2	B	7	QX15	q75.EXT	-27.8108178625469
1799	20140624	RIAILs	1	m	carmustine	halfpercDMSO	2	B	7	QX49	q75.EXT	19.8212102908574
1800	20140429	RIAILs	1	b	carmustine	halfpercDMSO	2	B	7	QX402	q75.norm.EXT	-0.0908238594371992
1801	20140512	RIAILs	1	e	carmustine	halfpercDMSO	2	B	7	QX192	q75.norm.EXT	-0.553351274794075
1802	20140513	RIAILs	1	f	carmustine	halfpercDMSO	2	B	7	QX91	q75.norm.EXT	-0.280895255036589
1803	20140520	RIAILs	1	h	carmustine	halfpercDMSO	2	B	7	QX456	q75.norm.EXT	0.19068091709504
1804	20140603	RIAILs	1	k	carmustine	halfpercDMSO	2	B	7	QX563	q75.norm.EXT	0.322045891024397
1805	20140623	RIAILs	1	l	carmustine	halfpercDMSO	2	B	7	QX15	q75.norm.EXT	-0.0120411647577858
1806	20140624	RIAILs	1	m	carmustine	halfpercDMSO	2	B	7	QX49	q75.norm.EXT	0.184871077132337
1807	20140429	RIAILs	1	b	carmustine	halfpercDMSO	2	B	7	QX402	q75.TOF	24.4306055022867
1808	20140512	RIAILs	1	e	carmustine	halfpercDMSO	2	B	7	QX192	q75.TOF	-85.8796938048103
1809	20140513	RIAILs	1	f	carmustine	halfpercDMSO	2	B	7	QX91	q75.TOF	-70.4997724678217
1810	20140520	RIAILs	1	h	carmustine	halfpercDMSO	2	B	7	QX456	q75.TOF	-13.3451919585976
1811	20140603	RIAILs	1	k	carmustine	halfpercDMSO	2	B	7	QX563	q75.TOF	78.2221779151743
1812	20140623	RIAILs	1	l	carmustine	halfpercDMSO	2	B	7	QX15	q75.TOF	-54.5876534443349
1813	20140624	RIAILs	1	m	carmustine	halfpercDMSO	2	B	7	QX49	q75.TOF	-7.08239649836229
1814	20140429	RIAILs	1	b	carmustine	halfpercDMSO	2	B	7	QX402	q90.EXT	-59.8777740589544
1815	20140512	RIAILs	1	e	carmustine	halfpercDMSO	2	B	7	QX192	q90.EXT	-926.849733563767
1816	20140513	RIAILs	1	f	carmustine	halfpercDMSO	2	B	7	QX91	q90.EXT	-451.064401736222
1817	20140520	RIAILs	1	h	carmustine	halfpercDMSO	2	B	7	QX456	q90.EXT	-154.190363271659
1818	20140603	RIAILs	1	k	carmustine	halfpercDMSO	2	B	7	QX563	q90.EXT	442.761223835295
1819	20140623	RIAILs	1	l	carmustine	halfpercDMSO	2	B	7	QX15	q90.EXT	-187.592902384397
1820	20140624	RIAILs	1	m	carmustine	halfpercDMSO	2	B	7	QX49	q90.EXT	41.2868939026067
1821	20140429	RIAILs	1	b	carmustine	halfpercDMSO	2	B	7	QX402	q90.norm.EXT	-0.229977369098808
1822	20140512	RIAILs	1	e	carmustine	halfpercDMSO	2	B	7	QX192	q90.norm.EXT	-0.618174094531566
1823	20140513	RIAILs	1	f	carmustine	halfpercDMSO	2	B	7	QX91	q90.norm.EXT	-0.130908788079301
1824	20140520	RIAILs	1	h	carmustine	halfpercDMSO	2	B	7	QX456	q90.norm.EXT	0.358888942159407
1825	20140603	RIAILs	1	k	carmustine	halfpercDMSO	2	B	7	QX563	q90.norm.EXT	0.0863346892742956
1826	20140623	RIAILs	1	l	carmustine	halfpercDMSO	2	B	7	QX15	q90.norm.EXT	0.0278567704187872
1827	20140624	RIAILs	1	m	carmustine	halfpercDMSO	2	B	7	QX49	q90.norm.EXT	0.0213166639934186
1828	20140429	RIAILs	1	b	carmustine	halfpercDMSO	2	B	7	QX402	q90.TOF	20.9491458386066
1829	20140512	RIAILs	1	e	carmustine	halfpercDMSO	2	B	7	QX192	q90.TOF	-133.03906219859
1830	20140513	RIAILs	1	f	carmustine	halfpercDMSO	2	B	7	QX91	q90.TOF	-67.6326428695193
1831	20140520	RIAILs	1	h	carmustine	halfpercDMSO	2	B	7	QX456	q90.TOF	-16.954765044391
1832	20140603	RIAILs	1	k	carmustine	halfpercDMSO	2	B	7	QX563	q90.TOF	70.0198636421688
1833	20140623	RIAILs	1	l	carmustine	halfpercDMSO	2	B	7	QX15	q90.TOF	-30.9210009568824
1834	20140624	RIAILs	1	m	carmustine	halfpercDMSO	2	B	7	QX49	q90.TOF	-23.7177582601755
1835	20140429	RIAILs	1	b	carmustine	halfpercDMSO	2	B	7	QX402	var.EXT	-101256.457240371
1836	20140512	RIAILs	1	e	carmustine	halfpercDMSO	2	B	7	QX192	var.EXT	-176802.513694826
1837	20140513	RIAILs	1	f	carmustine	halfpercDMSO	2	B	7	QX91	var.EXT	-69917.6053590611
1838	20140520	RIAILs	1	h	carmustine	halfpercDMSO	2	B	7	QX456	var.EXT	-57863.0543242212
1839	20140603	RIAILs	1	k	carmustine	halfpercDMSO	2	B	7	QX563	var.EXT	252840.165301004
1840	20140623	RIAILs	1	l	carmustine	halfpercDMSO	2	B	7	QX15	var.EXT	-177121.568121462
1841	20140624	RIAILs	1	m	carmustine	halfpercDMSO	2	B	7	QX49	var.EXT	116877.665906924
1842	20140429	RIAILs	1	b	carmustine	halfpercDMSO	2	B	7	QX402	var.TOF	96.3736794537233
1843	20140512	RIAILs	1	e	carmustine	halfpercDMSO	2	B	7	QX192	var.TOF	-7887.42768397362
1844	20140513	RIAILs	1	f	carmustine	halfpercDMSO	2	B	7	QX91	var.TOF	-6820.32069000121
1845	20140520	RIAILs	1	h	carmustine	halfpercDMSO	2	B	7	QX456	var.TOF	-5603.26798214869
1846	20140603	RIAILs	1	k	carmustine	halfpercDMSO	2	B	7	QX563	var.TOF	11995.7479224837
1847	20140623	RIAILs	1	l	carmustine	halfpercDMSO	2	B	7	QX15	var.TOF	-7389.19151665094
1848	20140624	RIAILs	1	m	carmustine	halfpercDMSO	2	B	7	QX49	var.TOF	2255.19190426766
1849	20140429	RIAILs	1	b	carmustine	halfpercDMSO	2	B	9	QX39	cv.EXT	-0.092990756097626
1850	20140512	RIAILs	1	e	carmustine	halfpercDMSO	2	B	9	QX465	cv.EXT	-0.0166600038458861
1851	20140513	RIAILs	1	f	carmustine	halfpercDMSO	2	B	9	QX58	cv.EXT	0.080276369965858
1852	20140520	RIAILs	1	h	carmustine	halfpercDMSO	2	B	9	QX372	cv.EXT	0.0227937589937217
1853	20140526	RIAILs	1	i	carmustine	halfpercDMSO	2	B	9	QX449	cv.EXT	-0.138788310921339
1854	20140603	RIAILs	1	k	carmustine	halfpercDMSO	2	B	9	QX334	cv.EXT	0.0742652891685987
1855	20140623	RIAILs	1	l	carmustine	halfpercDMSO	2	B	9	QX378	cv.EXT	-0.0274793180419699
1856	20140624	RIAILs	1	m	carmustine	halfpercDMSO	2	B	9	QX442	cv.EXT	0.175340588710829
1857	20140429	RIAILs	1	b	carmustine	halfpercDMSO	2	B	9	QX39	cv.TOF	-0.0924481031293685
1858	20140512	RIAILs	1	e	carmustine	halfpercDMSO	2	B	9	QX465	cv.TOF	-0.0267799185344936
1859	20140513	RIAILs	1	f	carmustine	halfpercDMSO	2	B	9	QX58	cv.TOF	0.0393140383322236
1860	20140520	RIAILs	1	h	carmustine	halfpercDMSO	2	B	9	QX372	cv.TOF	-0.0362408722851751
1861	20140526	RIAILs	1	i	carmustine	halfpercDMSO	2	B	9	QX449	cv.TOF	-0.0676000803531149
1862	20140603	RIAILs	1	k	carmustine	halfpercDMSO	2	B	9	QX334	cv.TOF	0.0560096488158832
1863	20140623	RIAILs	1	l	carmustine	halfpercDMSO	2	B	9	QX378	cv.TOF	-0.0227551906952563
1864	20140624	RIAILs	1	m	carmustine	halfpercDMSO	2	B	9	QX442	cv.TOF	0.0363867912354718
1865	20140429	RIAILs	1	b	carmustine	halfpercDMSO	2	B	9	QX39	mean.EXT	-88.0206816867976
1866	20140512	RIAILs	1	e	carmustine	halfpercDMSO	2	B	9	QX465	mean.EXT	-72.8470170320492
1867	20140513	RIAILs	1	f	carmustine	halfpercDMSO	2	B	9	QX58	mean.EXT	-113.279979149401
1868	20140520	RIAILs	1	h	carmustine	halfpercDMSO	2	B	9	QX372	mean.EXT	34.1026217224464
1869	20140526	RIAILs	1	i	carmustine	halfpercDMSO	2	B	9	QX449	mean.EXT	201.817500335865
1870	20140603	RIAILs	1	k	carmustine	halfpercDMSO	2	B	9	QX334	mean.EXT	-61.1350714504966
1871	20140623	RIAILs	1	l	carmustine	halfpercDMSO	2	B	9	QX378	mean.EXT	-91.3701548260465
1872	20140624	RIAILs	1	m	carmustine	halfpercDMSO	2	B	9	QX442	mean.EXT	-206.824951023563
1873	20140429	RIAILs	1	b	carmustine	halfpercDMSO	2	B	9	QX39	mean.norm.EXT	-0.103358583492209
1874	20140512	RIAILs	1	e	carmustine	halfpercDMSO	2	B	9	QX465	mean.norm.EXT	-0.0270792697051175
1875	20140513	RIAILs	1	f	carmustine	halfpercDMSO	2	B	9	QX58	mean.norm.EXT	-0.150815897290185
1876	20140520	RIAILs	1	h	carmustine	halfpercDMSO	2	B	9	QX372	mean.norm.EXT	0.0191288533569726
1877	20140526	RIAILs	1	i	carmustine	halfpercDMSO	2	B	9	QX449	mean.norm.EXT	0.234568212646292
1878	20140603	RIAILs	1	k	carmustine	halfpercDMSO	2	B	9	QX334	mean.norm.EXT	0.115776808097177
1879	20140623	RIAILs	1	l	carmustine	halfpercDMSO	2	B	9	QX378	mean.norm.EXT	0.0130198411803655
1880	20140624	RIAILs	1	m	carmustine	halfpercDMSO	2	B	9	QX442	mean.norm.EXT	-0.0434410808475392
1881	20140429	RIAILs	1	b	carmustine	halfpercDMSO	2	B	9	QX39	mean.TOF	-9.41121874668072
1882	20140512	RIAILs	1	e	carmustine	halfpercDMSO	2	B	9	QX465	mean.TOF	-18.9073026374092
1883	20140513	RIAILs	1	f	carmustine	halfpercDMSO	2	B	9	QX58	mean.TOF	-23.2301756280614
1884	20140520	RIAILs	1	h	carmustine	halfpercDMSO	2	B	9	QX372	mean.TOF	7.88498678527262
1885	20140526	RIAILs	1	i	carmustine	halfpercDMSO	2	B	9	QX449	mean.TOF	41.5852901838023
1886	20140603	RIAILs	1	k	carmustine	halfpercDMSO	2	B	9	QX334	mean.TOF	-29.1585173872266
1887	20140623	RIAILs	1	l	carmustine	halfpercDMSO	2	B	9	QX378	mean.TOF	-21.5545925439599
1888	20140624	RIAILs	1	m	carmustine	halfpercDMSO	2	B	9	QX442	mean.TOF	-72.3971394428818
1889	20140429	RIAILs	1	b	carmustine	halfpercDMSO	2	B	9	QX39	median.EXT	42.5929625080346
1890	20140512	RIAILs	1	e	carmustine	halfpercDMSO	2	B	9	QX465	median.EXT	-25.7427078002947
1891	20140513	RIAILs	1	f	carmustine	halfpercDMSO	2	B	9	QX58	median.EXT	-123.477363850049
1892	20140520	RIAILs	1	h	carmustine	halfpercDMSO	2	B	9	QX372	median.EXT	51.7306727269484
1893	20140526	RIAILs	1	i	carmustine	halfpercDMSO	2	B	9	QX449	median.EXT	164.004634587025
1894	20140603	RIAILs	1	k	carmustine	halfpercDMSO	2	B	9	QX334	median.EXT	-219.132413238564
1895	20140623	RIAILs	1	l	carmustine	halfpercDMSO	2	B	9	QX378	median.EXT	-46.8536054213215
1896	20140624	RIAILs	1	m	carmustine	halfpercDMSO	2	B	9	QX442	median.EXT	-173.433525498705
1897	20140429	RIAILs	1	b	carmustine	halfpercDMSO	2	B	9	QX39	median.norm.EXT	-0.0824763685333441
1898	20140512	RIAILs	1	e	carmustine	halfpercDMSO	2	B	9	QX465	median.norm.EXT	-0.112745621817992
1899	20140513	RIAILs	1	f	carmustine	halfpercDMSO	2	B	9	QX58	median.norm.EXT	-0.3009666381157
1900	20140520	RIAILs	1	h	carmustine	halfpercDMSO	2	B	9	QX372	median.norm.EXT	0.0521389846150679
1901	20140526	RIAILs	1	i	carmustine	halfpercDMSO	2	B	9	QX449	median.norm.EXT	0.364028079925301
1902	20140603	RIAILs	1	k	carmustine	halfpercDMSO	2	B	9	QX334	median.norm.EXT	0.103183623756604
1903	20140623	RIAILs	1	l	carmustine	halfpercDMSO	2	B	9	QX378	median.norm.EXT	0.0125782628330316
1904	20140624	RIAILs	1	m	carmustine	halfpercDMSO	2	B	9	QX442	median.norm.EXT	-0.139235376251352
1905	20140429	RIAILs	1	b	carmustine	halfpercDMSO	2	B	9	QX39	median.TOF	25.4421724523077
1906	20140512	RIAILs	1	e	carmustine	halfpercDMSO	2	B	9	QX465	median.TOF	-19.9938866912552
1907	20140513	RIAILs	1	f	carmustine	halfpercDMSO	2	B	9	QX58	median.TOF	-38.5616721494977
1908	20140520	RIAILs	1	h	carmustine	halfpercDMSO	2	B	9	QX372	median.TOF	26.9841160802231
1909	20140526	RIAILs	1	i	carmustine	halfpercDMSO	2	B	9	QX449	median.TOF	48.6758808225745
1910	20140603	RIAILs	1	k	carmustine	halfpercDMSO	2	B	9	QX334	median.TOF	-74.0817905089037
1911	20140623	RIAILs	1	l	carmustine	halfpercDMSO	2	B	9	QX378	median.TOF	-17.1032417130286
1912	20140624	RIAILs	1	m	carmustine	halfpercDMSO	2	B	9	QX442	median.TOF	-76.017308765974
1913	20140429	RIAILs	1	b	carmustine	halfpercDMSO	2	B	9	QX39	n	-24.7496889444595
1914	20140512	RIAILs	1	e	carmustine	halfpercDMSO	2	B	9	QX465	n	-14.8678917421784
1915	20140513	RIAILs	1	f	carmustine	halfpercDMSO	2	B	9	QX58	n	49.6411814928976
1916	20140520	RIAILs	1	h	carmustine	halfpercDMSO	2	B	9	QX372	n	-45.6427457003059
1917	20140526	RIAILs	1	i	carmustine	halfpercDMSO	2	B	9	QX449	n	-6.76139008620062
1918	20140603	RIAILs	1	k	carmustine	halfpercDMSO	2	B	9	QX334	n	-7.43171525047873
1919	20140623	RIAILs	1	l	carmustine	halfpercDMSO	2	B	9	QX378	n	59.6818444864351
1920	20140624	RIAILs	1	m	carmustine	halfpercDMSO	2	B	9	QX442	n	4.87383798206636
1921	20140429	RIAILs	1	b	carmustine	halfpercDMSO	2	B	9	QX39	norm.n	-7.66667208321619
1922	20140512	RIAILs	1	e	carmustine	halfpercDMSO	2	B	9	QX465	norm.n	-4.84232490357044
1923	20140513	RIAILs	1	f	carmustine	halfpercDMSO	2	B	9	QX58	norm.n	17.3533817362444
1924	20140520	RIAILs	1	h	carmustine	halfpercDMSO	2	B	9	QX372	norm.n	-14.9142147780666
1925	20140526	RIAILs	1	i	carmustine	halfpercDMSO	2	B	9	QX449	norm.n	-1.09688417824318
1926	20140603	RIAILs	1	k	carmustine	halfpercDMSO	2	B	9	QX334	norm.n	-2.44814270077706
1927	20140623	RIAILs	1	l	carmustine	halfpercDMSO	2	B	9	QX378	norm.n	19.9942293415619
1928	20140624	RIAILs	1	m	carmustine	halfpercDMSO	2	B	9	QX442	norm.n	0.756546168976324
1929	20140429	RIAILs	1	b	carmustine	halfpercDMSO	2	B	9	QX39	q10.EXT	7.1622578794887
1930	20140512	RIAILs	1	e	carmustine	halfpercDMSO	2	B	9	QX465	q10.EXT	-6.69986654837903
1931	20140513	RIAILs	1	f	carmustine	halfpercDMSO	2	B	9	QX58	q10.EXT	-12.9973834704097
1932	20140520	RIAILs	1	h	carmustine	halfpercDMSO	2	B	9	QX372	q10.EXT	0.992113601430001
1933	20140526	RIAILs	1	i	carmustine	halfpercDMSO	2	B	9	QX449	q10.EXT	11.2758614200424
1934	20140603	RIAILs	1	k	carmustine	halfpercDMSO	2	B	9	QX334	q10.EXT	-9.84365735805419
1935	20140623	RIAILs	1	l	carmustine	halfpercDMSO	2	B	9	QX378	q10.EXT	6.92241203484262
1936	20140624	RIAILs	1	m	carmustine	halfpercDMSO	2	B	9	QX442	q10.EXT	-15.9698064678913
1937	20140429	RIAILs	1	b	carmustine	halfpercDMSO	2	B	9	QX39	q10.norm.EXT	0.0245932693118796
1938	20140512	RIAILs	1	e	carmustine	halfpercDMSO	2	B	9	QX465	q10.norm.EXT	0.00912761574720354
1939	20140513	RIAILs	1	f	carmustine	halfpercDMSO	2	B	9	QX58	q10.norm.EXT	-0.0681765083718179
1940	20140520	RIAILs	1	h	carmustine	halfpercDMSO	2	B	9	QX372	q10.norm.EXT	-0.0334440311503237
1941	20140526	RIAILs	1	i	carmustine	halfpercDMSO	2	B	9	QX449	q10.norm.EXT	0.0836002493264959
1942	20140603	RIAILs	1	k	carmustine	halfpercDMSO	2	B	9	QX334	q10.norm.EXT	-0.00378988707020594
1943	20140623	RIAILs	1	l	carmustine	halfpercDMSO	2	B	9	QX378	q10.norm.EXT	0.0237073117187231
1944	20140624	RIAILs	1	m	carmustine	halfpercDMSO	2	B	9	QX442	q10.norm.EXT	-0.0525473125548321
1945	20140429	RIAILs	1	b	carmustine	halfpercDMSO	2	B	9	QX39	q10.TOF	2.85049501290575
1946	20140512	RIAILs	1	e	carmustine	halfpercDMSO	2	B	9	QX465	q10.TOF	-3.63809137939257
1947	20140513	RIAILs	1	f	carmustine	halfpercDMSO	2	B	9	QX58	q10.TOF	-3.54769773816686
1948	20140520	RIAILs	1	h	carmustine	halfpercDMSO	2	B	9	QX372	q10.TOF	-1.32643345084223
1949	20140526	RIAILs	1	i	carmustine	halfpercDMSO	2	B	9	QX449	q10.TOF	0.466044455787632
1950	20140603	RIAILs	1	k	carmustine	halfpercDMSO	2	B	9	QX334	q10.TOF	-4.57570200262721
1951	20140623	RIAILs	1	l	carmustine	halfpercDMSO	2	B	9	QX378	q10.TOF	0.725344573206879
1952	20140624	RIAILs	1	m	carmustine	halfpercDMSO	2	B	9	QX442	q10.TOF	-4.67627788463312
1953	20140429	RIAILs	1	b	carmustine	halfpercDMSO	2	B	9	QX39	q25.EXT	21.1200113623513
1954	20140512	RIAILs	1	e	carmustine	halfpercDMSO	2	B	9	QX465	q25.EXT	-21.5010449640134
1955	20140513	RIAILs	1	f	carmustine	halfpercDMSO	2	B	9	QX58	q25.EXT	-59.6449139741438
1956	20140520	RIAILs	1	h	carmustine	halfpercDMSO	2	B	9	QX372	q25.EXT	15.7686727720268
1957	20140526	RIAILs	1	i	carmustine	halfpercDMSO	2	B	9	QX449	q25.EXT	42.1477711398108
1958	20140603	RIAILs	1	k	carmustine	halfpercDMSO	2	B	9	QX334	q25.EXT	10.8476082878879
1959	20140623	RIAILs	1	l	carmustine	halfpercDMSO	2	B	9	QX378	q25.EXT	8.38550278808382
1960	20140624	RIAILs	1	m	carmustine	halfpercDMSO	2	B	9	QX442	q25.EXT	-49.0419926023109
1961	20140429	RIAILs	1	b	carmustine	halfpercDMSO	2	B	9	QX39	q25.norm.EXT	-0.0325620392043489
1962	20140512	RIAILs	1	e	carmustine	halfpercDMSO	2	B	9	QX465	q25.norm.EXT	-0.0736074718279037
1963	20140513	RIAILs	1	f	carmustine	halfpercDMSO	2	B	9	QX58	q25.norm.EXT	-0.191204940862649
1964	20140520	RIAILs	1	h	carmustine	halfpercDMSO	2	B	9	QX372	q25.norm.EXT	-0.0714497304189044
1965	20140526	RIAILs	1	i	carmustine	halfpercDMSO	2	B	9	QX449	q25.norm.EXT	0.149260792475724
1966	20140603	RIAILs	1	k	carmustine	halfpercDMSO	2	B	9	QX334	q25.norm.EXT	-0.0196064306525926
1967	20140623	RIAILs	1	l	carmustine	halfpercDMSO	2	B	9	QX378	q25.norm.EXT	0.0599928049600032
1968	20140624	RIAILs	1	m	carmustine	halfpercDMSO	2	B	9	QX442	q25.norm.EXT	-0.0914665804871532
1969	20140429	RIAILs	1	b	carmustine	halfpercDMSO	2	B	9	QX39	q25.TOF	9.23245820042278
1970	20140512	RIAILs	1	e	carmustine	halfpercDMSO	2	B	9	QX465	q25.TOF	1.81578221109263
1971	20140513	RIAILs	1	f	carmustine	halfpercDMSO	2	B	9	QX58	q25.TOF	-16.5920165877864
1972	20140520	RIAILs	1	h	carmustine	halfpercDMSO	2	B	9	QX372	q25.TOF	7.81706910941396
1973	20140526	RIAILs	1	i	carmustine	halfpercDMSO	2	B	9	QX449	q25.TOF	18.8806818974052
1974	20140603	RIAILs	1	k	carmustine	halfpercDMSO	2	B	9	QX334	q25.TOF	-18.4865547816861
1975	20140623	RIAILs	1	l	carmustine	halfpercDMSO	2	B	9	QX378	q25.TOF	-1.21486798672717
1976	20140624	RIAILs	1	m	carmustine	halfpercDMSO	2	B	9	QX442	q25.TOF	-28.195117354086
1977	20140429	RIAILs	1	b	carmustine	halfpercDMSO	2	B	9	QX39	q75.EXT	-198.632324571952
1978	20140512	RIAILs	1	e	carmustine	halfpercDMSO	2	B	9	QX465	q75.EXT	-147.109193832508
1979	20140513	RIAILs	1	f	carmustine	halfpercDMSO	2	B	9	QX58	q75.EXT	-120.002581998219
1980	20140520	RIAILs	1	h	carmustine	halfpercDMSO	2	B	9	QX372	q75.EXT	-64.320133766179
1981	20140526	RIAILs	1	i	carmustine	halfpercDMSO	2	B	9	QX449	q75.EXT	439.852878140427
1982	20140603	RIAILs	1	k	carmustine	halfpercDMSO	2	B	9	QX334	q75.EXT	22.5313979995726
1983	20140623	RIAILs	1	l	carmustine	halfpercDMSO	2	B	9	QX378	q75.EXT	-159.625657325157
1984	20140624	RIAILs	1	m	carmustine	halfpercDMSO	2	B	9	QX442	q75.EXT	-399.995620145273
1985	20140429	RIAILs	1	b	carmustine	halfpercDMSO	2	B	9	QX39	q75.norm.EXT	-0.290726567874568
1986	20140512	RIAILs	1	e	carmustine	halfpercDMSO	2	B	9	QX465	q75.norm.EXT	0.0172684604780133
1987	20140513	RIAILs	1	f	carmustine	halfpercDMSO	2	B	9	QX58	q75.norm.EXT	-0.10852209086121
1988	20140520	RIAILs	1	h	carmustine	halfpercDMSO	2	B	9	QX372	q75.norm.EXT	0.156248647828846
1989	20140526	RIAILs	1	i	carmustine	halfpercDMSO	2	B	9	QX449	q75.norm.EXT	0.346117267306182
1990	20140603	RIAILs	1	k	carmustine	halfpercDMSO	2	B	9	QX334	q75.norm.EXT	0.152720715534709
1991	20140623	RIAILs	1	l	carmustine	halfpercDMSO	2	B	9	QX378	q75.norm.EXT	-0.0161446919811045
1992	20140624	RIAILs	1	m	carmustine	halfpercDMSO	2	B	9	QX442	q75.norm.EXT	-0.0407614832622532
1993	20140429	RIAILs	1	b	carmustine	halfpercDMSO	2	B	9	QX39	q75.TOF	-36.78446698179
1994	20140512	RIAILs	1	e	carmustine	halfpercDMSO	2	B	9	QX465	q75.TOF	-31.6933352538567
1995	20140513	RIAILs	1	f	carmustine	halfpercDMSO	2	B	9	QX58	q75.TOF	-42.2327795060357
1996	20140520	RIAILs	1	h	carmustine	halfpercDMSO	2	B	9	QX372	q75.TOF	-11.41211674761
1997	20140526	RIAILs	1	i	carmustine	halfpercDMSO	2	B	9	QX449	q75.TOF	91.0154253919425
1998	20140603	RIAILs	1	k	carmustine	halfpercDMSO	2	B	9	QX334	q75.TOF	-24.8504896604627
1999	20140623	RIAILs	1	l	carmustine	halfpercDMSO	2	B	9	QX378	q75.TOF	-34.1836452636021
[truncated: 143,845 more rows]
